# Supplementary material for: Somatic hypermutation of T cell receptor α chain contributes to selection in nurse shark thymus
Source: eLife journal article supplement (doi:10.7554/elife.28477), 2018-04-17
Supplement: supp [file elife-28477-supp-v1.zip]

Archive with 6 entries (6 files):
- elife_poa_e28477_Transparent_Reporting_File.docx
- elife_poa_e28477_Figure_6_source_data_1.xlsx
- elife_poa_e28477_Table_1_source_data_1.xlsx
- elife_poa_e28477_Figure_9_figure_supplement_2.pdf
- elife_poa_e28477_Figure_4_source_data_1.docx
- elife_poa_e28477_Figure_9_figure_supplement_1.pdf
