# Supplementary material for: Somatic hypermutation of T cell receptor α chain contributes to selection in nurse shark thymus
Source: eLife journal article supplement (doi:10.7554/elife.28477), 2018-04-17
Supplement: supp [file elife-28477-supp-v1.zip › elife_poa_e28477_Figure_6_source_data_1.xlsx]

## Sheet: Fig6 Data
	Mutation Rate
	FR1	CDR1	FR2	CDR2	FR3	CDR3
NSYN	1.62602	3.56322	1.29125	2.01149	0.950683	2.31293
SYN	0.650407	1.72414	0.573888	1.00575	0.693207	0.952381
ALL	2.27642	5.28736	1.86514	3.01724	1.64389	3.26531
	Std Dev
	FR1	CDR1	FR2	CDR2	FR3	CDR3
NSYN	4.54673	3.5162	2.25227	2.00454	3.41388	2.06706
SYN	2.99393	1.68954	1.13618	1.02691	3.12468	1.02691
ALL	6.53104	4.57861	2.84125	2.80908	5.42888	2.27236
															Updated 180219
