# Supplementary material for: Somatic hypermutation of T cell receptor α chain contributes to selection in nurse shark thymus
Source: eLife journal article supplement (doi:10.7554/elife.28477), 2018-04-17
Supplement: supp [file elife-28477-supp-v1.zip › elife_poa_e28477_Table_1_source_data_1.xlsx]

## Sheet: Table 1 source data 180327
description	sequence
aV1.1J_V18_101310	GATTCTGTATCACAAAGACCGCTTGTAAGTATAGTGACTGAG---GGAGATGATGTCCAGTTGCTTTGTAATTACACTGCTGCAGCAAGCAACGACCCCAAC---CTGTTCTGGTACCGTCAGAAAACCAGCGGATCCGTGGAGTATCTAGTACAGAGAAGCAAATATATC------AGAGACCAAGAAAGATTTCCA---GGAGATCGGCTTTCCTCGGATTTTGACCATGTGAACCACAATATTCAGTTGAAAGTGGCGAAAACAGAACTGACAGACTCCGCAGTGTATTACTGCGCTCTGAGA------CGGGGCCACTACGGAACTGGTACTGG-----------------------------GTTTATCTTTGGAGAGGGGACAGGGTTGAGTG…
aV1.1J_V08_110210	GATTCTGTATCACAAACACCGGGTGGAATCATAGTGACTGAG---GGAGATGATGTCCAGATGTTTTGTAATTACACTGTTGCAGCAAGCAACGATCCCAAC---CTGTTCTGGTACCGTCAGAAAACCAGCGGAACCGTGGAGTATCTAATACAGAGAAGCAAATATATC------AGGAACCAAGAAAGATTTCCA---GGAGATCGGCTTTCCTCGGATTTTGACCATGTGAACCACAATATCCAGCTGAAAGTGCTGAAAACAGAACTGACAGACTCCGCAGTGTATTACTGCGCTCTGAGA------CGGGGCCACTATGGAACTGGTACT-----------------------------AAGTTTATCTTTGGAGAGGGGACAAAACTAACTG…
aV1.1J_V01_101310	GATTCTGTATCACAAACACCGCCACAAATCATAACGACTGAG---GGAGATGATGTCCAGTTGTTTTGTAATTACACTGCTGGAGCAAGCAACGATCCCAAT---CTGTTCTGGTACCGTCAGAAAACCAGCGGATCCGTGGAGTATCTAGTACAGAGAAGTAAATATATC------AGGCACCAAGAAAGATTTCCA---GGAGATCGGCTTTCCTCGGATTTTGACCATGTGAACCACAATATACAGCTGAAAGTGCTGAAAACAGAACTGACAGACTCCGCAGTGTATTACTGCGCTCTGAGA------CGGGGCCACTACGGAGATGAGACT-----------------------------AAGTTTATCTTTGGAGAGGGGACAAAGTTAACCG…
aV1.1J_V05_102810	GATTCTGTTTCACAAACACCACTTGTAATCAGTGTGACTGAG---GGAGATGATGTCCAGTTGTTTTGTAATTATACCACTGCAGTAAGCAACGATCCCAAC---CTGTTCTGGTACCGTCAGACAACCAGCGGATCCGTGGAGTATCTAGTACAGAGAACGAAATATATC------AGGAACCAGGAAAGATTTCCA---GGAGATCGGCTTTCCTCGGATTTTGACCATGTGAACCACAATATCGAGCTGAAAGTGCTGAAAACAGAACTGACAGACTCCGCAGTGTATTACTGCGCTCTGAGAG------CACGGG--------------------------------CTGAATCAGCTTCTAAGCTTATCTTTGGAGAGGGGACAAAGTTAACCG…
aV1.1J_V18_110210	GCTTCTGTATCACAAGTACCGCTTGTAATCATAGTGACTGAG---GGAGATGATGTCCAGTTGTTTTGTAATTACACTGCTGCAGCGAGTAACGATCCGAAC---CTGTTCTGGTACCGTCAGACGTCCAGCGGATCCGTGGATTATCTAGTACAGAGAAGCCCCTATATC------AGGAACAAGGAAAGATTTCCA---GGAGATCGGCTTTCCTCGGATTTTGACCATGTGAACCACAATATTCAGCTGAAAGTGCTGAAAACAGAACTGACAGACTCCGCAGTGTATTACTGCGCTCTGAGAG------CACGG--------------------------------TCTGAATCAGCTTCTAAGCTTATCTTTGGTGAGGGGACAAAGTTAATCG…
aV1.1J_V23_090110	GATTCTGTATCACAAACACCGCTTGTAATCATAGTGACTGAG---GGAGATGATGTCCAGTTGTTTTGTAATTACACTGCTGCAGCGAGCAACGATCCGAAC---CTGTTCTGGTACCGTCAGAAAACCAGCGGATCCGTGGATTATCTAGTACAGAGAAGCAACTATATC------AAGAACCAGGAAAGATTTCCA---GGAGATCGGCTTTCCTCGGATTTTGACCATGTGAACCACAATATCCAGCTGAAAGTCCTGAAAACAGAACTGACAGACTCCGCAGTCTATTACTGCGCTCTGAGA------CCACGG--------------------------------TCTGAATCAGCCTCTAAGCTTATCTTTGGAGAGGGGACAAAGTTAATCG…
aV1.1J_V15_091010	GACTCTGTATCACAAAGGCCACTTGTAATCATAGTGAGTGAG---GGAGATGATGTCCAGTTGTTTTGTAATTACACTGTTGCAGTAAACAACGATCCCTGC---CTGTTCTGGTACCGTCAGAAAACCAGCGGATCCGTGGAATATCTACTACAGAGAACTAAATATATC------ATGAACCAGGAAAGATTTCCA---GGAGATCGGCTTTCCTCGGATTTTGACCATGTGAACCACAATATCCAGTTGAAAGTGCTGAAAACAGAACTGACAGACTCCGCAGTGTATTACTGCGCTCTGAGA------CCACGGG--------------------------------CTGAATCAGCTTCTAAGCTTATCTTTGGAGAGGGGACAAAGTTGTCCG…
aV1.1J_V01_090110	GACTCTGTATCACAAAGGCCACTTGTAATCATAGTGAGTGAG---GGAGATGATGTCCAGTTGTTTTGTAATTACACTGTTGCAGTAAACAACGATCCCTGC---CTGTTCTGGTACCGTCAGAAAACCAGCGGATCCGTGGAATATCTACTACAGAGAACTAAATATATC------ATGAACCAGGAAAGATTTCCA---GGAGATCGGCTTTCCTCGGATTTTGACCATGTGAACCACAATATCCAGTTGAAAGTGCTGAAAACAGAACTGACAGACTCCGCAGTGTATTACTGCGCTCTGAGA------CCACGGG--------------------------------CTGAATCAGCTTCTAAGCTTATCTTTGGAGAGGGGACAAAGTTGTCCG…
aV1.1J_V01_091410	GATTATGTGGAACAAACACCGCTTGTAATTATAGTGACTGAG---GGAGATGATGTCCAGTTGTTTTGTAACTACACTGCTGCAGCAAACAACGATCCCAAC---CTGTTCTGGTACCGTCAGAAAACCAGCGGATCCGTGGAATATCTCCTACAGAGAAGCAAATATATC------AGGAATCAGGAAAGATTTCCA---GGAGATCGGCTTTCCTCGGATTTTGACCATGTGAACCACAATATCCAGCTGAAAGTGCTGAAAACAGAACTGGGAGACTCCGCAGTGTATTACTGCGC-------------CATGCCTATT-------------------------------GGGGGTTACAGCAAAACAGTATTTGGAGTTGGGACCAGACTCACCG…
aV1.1J_V15_101310	GATTATGTGGAACAAACACCGCTTGTAATTATAGTGACTGAG---GGAGATGATGTCCAGTTGTTTTGTAACTACACTGCTGCAGCAAACAACGATCCCAAC---CTGTTCTGGTACCGTCAGAAAACCAGCGGATCCGTGGAATATCTCCTACAGAGAAGCAAATATATC------AGGAATCAGGAAAGATTTCCA---GGAGATCGGCTTTCCTCGGATTTTGACCATGTGAACCACAATATCCAGCTGAAAGTGCTGAAAACAGAACTGGGAGACTCCGCAGTGTATTACTGCGC-------------CATGCCTATT-------------------------------GGGGGTTACAGCAAAACAGTATTTGGAGTTGGGACCAGACTCACCG…
aV1.1J_V08_101310	GATTCTGTATCACAAACACCGCTTGTAATCATAGTGACTGAG---GGAGATGATGTCCAGTTGTTTTGTAATTACACTGCTGCAGCAACCAACGATCCCAAC---CTGTTCTGGTACCGTCAGAAAACCAGCGGATCCCTTCAGTATCTACTACAGAGAAGCAAATATATC------AGGAACCAGGAAAGAATTATA---GCCGATCGGCTTTCCTCGGATTTAGACCATGTGAACCACAATATCCAACTAAAAGTGCTGAAAACAGAACTGACAGACTCCGCAGTGTATTACTGCGCTCTGAGG------CCGGGTACTGGAA--------------------------------TAGCTGATCAGCTTATCTTCGGAGAGGGGACCGAGTTGACCG…
aV1.1J_V17_090110	GATTCTGTATCACAAACACCGCTTGTAATCATAGTGACTGAG---GGAGATGATGTCCAGTTGTTTTGTAATTACACTGCTGCAGCAAGCAACGATCCCAAC---CTGTTCTGGTACCGTCAGAAAACCAGCGGATCCGTGGAGTATCTAGTACAGAGAAGCAAATATATC------AGGAACCAGGAAAGATTTCCA---GGAGATCGGCTTTCCTCGGATTTAGACCATGTGAACCACAATATCCAGCTGAAAGTGCTGAAAACAGAACTGACAGACTCCGCAGTGTATTACTGCGCTCTGAGG------CCGGGTACTGGAATAA--------------------------------CTGATCAGCTTATCTTTGGAGAGGGGACAAAGTTGACCG…
aV1.1J_V07_090110	GATTCTGTATCACAAACACCGCTTGTAATCATAGTGACTGAG---GGAGATGATGTCCAGCTGTTTTGTAATTACACTGCTGCAGCAAGCAACGATCCCAAC---CTGTTCTGGTACCGTCAGAAAACCAGCGGATCCGTGGAGTATCTAGTACAGAGAAGCAAATATATC------AGGAACCAGGAAAGATTTCCA---GGAGATCGGCTTTCCTCGGATTTTGACCATGTGAACCACAATATTCAACTGAAAGTGCTGAAAACAGAACTGACAGACTCCGCAGTGTATTACTGCGCTCTGAGG------CCGGGTACTGGA--------------------------------GTAGCTGATCAGCTTATCTTTGGAGAGGGGACAAAGTTGACCG…
aV1.1m_T18_072610	GATTCTGTATCACAAACACCGCTTGTAATCATAGTGACTGAG---GGAGATGATGTCCAGTTGTTTTGTAATTACACTGCTGCAGCAAGCAACGATCCCAAC---CTGTTCTGGTACCGTCAGAAAACCAGCGGATCCGTGGAGTATCTAGTACAGAGAAGCAAATATATC------AGGAACCAGGAAAGATTTCCA---GGAGATCGGCTTTCCTCGGATTTTGACCATGTGAACCACAATATCCAGCTGAAAGTGCTGAAAACAGAACTGACAGACTCCGCAGTGTATTACTGCGCTCTGAGC------CCGTAT--------------------------------------GATAACACCAAGCTTATCTTTGGAGAAGGGACCAGACTAACAG…
aV1.1m_T21_072012	GATTCTGTATCACAAACACCGCTTGTAATCATAGTGACTGAG---GGAGATGATGTCCAGTTGTTTTGTAATTACACTGCTGCAGCAAGCAACGATCCCAAC---CTGTTCTGGTACCGTCAGAAAACCAGCGGATCCGTGGAGTATCTAGTACAGAGAAGCAAATATATC------AGGAACCAGGAAAGATTTCCA---GGAGATCGGCTTTCCTCGGATTTTGACCATGTGAACCACAATATCCAGCTGAAAGTGCTGAAAACAGAACTGACAGACTCCGCAGTGTATTACTGCGCTCTGAGC------CCGTAT--------------------------------------GATAACACCAAGCTTATCTTTGGAGAAGGGACCAGACTAACAG…
aV1.1m_T17_071212	GATTCTGTATCACAAACACCGCTTGTAATCATAGTGACTGAG---GGAGATGATGTCCAGTTGTTTTGTAATTACACTGCTGCAGCAAGCAACGATCCCAAC---CTGTTCTGGTACCGTCAGAAAACCAGCGGATCCGTGGAGTATCTAGTACAGAGAAGCAAATATATC------AGGAACCAGGAAAGATTTCCA---GGAGATCGGCTTTCCTCGGATTTTGACCATGTGAACCACAATATCCAGCTGAAAGTGCTGAAAACAGAACTGACAGACTCCGCAGTGTATTACTGCGCTCTGAG-------CCGGACT----------------------------------GGAGTAGCTGATCAGCTTATCTTTGGAGAGGGGACAAAGTTGACCG…
aV1.1m_T23_071212	GATTCTGTATCACAAACACCGCTTGTAATCATAGTGACTGAG---GGAGATGATGTCCAGTTGTTTTGTAATTACACTGCTGCAGCAAGCAACGATCCCAAC---CTGTTCTGGTACCGTCAGAAAACCAGCGGATCCGTGGAGTATCTAGTACAGAGAAGCAAATATATC------AGGAACCAGGAAAGATTTCCA---GGAGATCGGCTTTCCTCGGATTTTGACCATGTGAACCACAATATCCAGCTGAAAGTGCTGAAAACAGAACTGACAGACTCCGCAGTGTATTACTGCGCTCTGAG-------CCGGACT----------------------------------GGAGTAGCTGATCAGCTTATCTTTGGAGAGGGGACAAAGTTGACCG…
aV1.1J_V14_101310	GATTCTGTATCACAAACACCGCTTGTAATCATAGTGACTGAG---GGAGATGATGTCCAGTTGTTTTGTAATTACACT------GTAAGCAACGATCCCACC---CTGTTGTGGTACCGTCAGGGAACCAGCGGATCCCTGGAGTATCTATTACAGAGAAGCAAATATATC------AGGAACCAGGAAAGATTTCCA---GGAGATCGGCTTTCCTCGGATTTTGACCATGTGAACCACAATATCCAGCTGAAAGTACTGAAAACAGAACTGACAGACTCCGCAGTGTATTTCTGCGCTCTGAGA------CCCCCATATACT--------------------------------GGAAACACCCCCCTCGTGTTTGGAAATGGGACCCGACTCATAG…
aV1.1J_V16_101310	GATTCTGTATCACAAACACCGCTTGTAATCATAGTGACTGAG---GGAGATGATGTCCAGTTGTTTTGTAATTACACT------GTAAGCAACGATCCCACC---CTGTTGTGGTACCGTCAGGGAACCAGCGGATCCCTGGAGTATCTATTACAGAGAAGCAAATATATC------AGGAACCAGGAAAGATTTCCA---GGAGATCGGCTTTCCTCGGATTTTGACCATGTGAACCACAATATCCAGCTGAAAGTACTGAAAACAGAACTGACAGACTCCGCAGTGTATTTCTGCGCTCTGAGA------CCCCCATATACT--------------------------------GGAAACACCCCCCTCGTGTTTGGAAATGGGACCCGACTCATAG…
aV1.1m_T02_060512	GATTCTGTATCACAAACACCGCTTGTAATCATAGTGACTGAG---GGAGATGATGTCCAGTTGTTTTGTAATTACACTGCTGCAGCAAGCAACGATCCCAAC---CTGTTCTGGTACCGTCAGAAAACCAGCGGATCCGTGGAGTATCTAGTACAGAGAAGCAAATATATC------AGGAACCAGGAAAGATTTCCA---GGAGATCGGCTTTCCTCGGATTTTGACCATGTGAACCACAATATCCAGCTGAAAGTGCTGAAAACAGAACTGACAGACTCCGCAGTGTATTACTGCGCTCTGAGA------CCGCCGCAT-----------------------------------GATAACACCAAGCTTATCTTTGGAGAAGGGACCAGACTAACAG…
aV1.1J_V05_091010	GATTCTGTATCACAAACACCGCTTGTAATCATAGTGACTGAG---GGAGATGATGTCCAGTTGTTTTGTAATTACACTGCAGCAGCAAGCAACGATCCCAAT---CTGTTCTGGTACCGTCAGAAAACCAGCGGATCCGTGGAATATCTAGTACAGAGAAGCAAATATATC------AGGAACCAGGAAAGATTTCCA---GGAGATCGGCTTTCCTCGGATTTTGACCATGTGAACCACAATATCCAGCTGAAAGTGCTGAAAACAGAACTGACAGACTCCGCAGTGTATTACTGCGCTCTGAGA------CCGGTA--------------------------------TCTGAATCTGCTTCTAAGCTTATCTTTGGAGAGGGGACAAAGTTAACCG…
aV1.1J_V19_110210	GATTCTGTATCACAAACACCGCTTGTAATCATAGTGACTGAG---GGAGATGATGTCCAGTTGTTTTGTAATTACACTGCTGCAGCAAGCAACGATCCCAAC---CTGTTCTGGTACCGTCAGAAAACCAGCGGATCCGTGGAGTATCTAGTACAGAGAAGCAAATATATC------AGGAACCAGGAAAGATTTCCA---GGAGATCGGCTTTCCTCGGATTTTGACCATGTGAACCACAATATCCAGCTGAAAGTGCTGAAAACAGAACTGACAGACTCCGCAGTGTATTACTGCGCTCTGAG-------CCGG----------------------------------TACGGAACTGGTAATAAGCTTATCTTTGGAGAGGGGACAAAGTTAACCG…
aV1.1J_V13_101310	GATTCTGTATCACAAACACCGCTTGTAATCATAGTGACTGAG---GGAGATGATGTCCAGTTGTTTTGTAATTACACTGCTGCAGCAAGCAACGATCCCAAC---CTGTTCTGGTACCGTCAGAAAACCAGCGGATCCGTGGAGTATCTAGTACAGAGAAGCAAATATATC------AGGAACCAGGAAAGATTTCCA---GGAGATCGGCTTTCCTCGGATTTTGACCATGTGAACCACAATATCCAGCTGAAAGTGCTGAAAACAGAACTGACAGACTCCGCAGTGTATTACTGCGCTCTGAGAG--------------------------------------------CTGGACTAGCTTCTAAGCTTATCTTTGGAGAGGGGACAAAGTTAACTG…
aV1.1m_T08_060512	GATTCTGTATCACAAACACCGCTTGTAATCATAGTGACTGAG---GGAGATGATGTCCAGTTGTTTTGTAATTACACTGCTGCAGCAAGCAACGATCCCAAC---CTGTTCTGGTACCGTCAGAAAACCAGCGGATCCGTGGAGTATCTAGTACAGAGAAGCAAATATATC------AGGAACCAGGAAAGATTTCCA---GGAGATCGGCTTTCCTCGGATTTTGACCATGTGAACCACAATATCCAGCTGAAAGTGCTGAAAACAGAACTGACAGACTCCGCAGTGTATTACTGCGCTCTG---------TCGGGA-----------------------------TATGGTACAGGTGCTGAAAAGCTGATCTTCGGAGCAGGGACCAGGCTCACTG…
aV1.1J_V02_110210	GATTCTGTATCACAAACACCGCTTGTAATCATAGTGACTGAG---GGAGATGATGTCCAGTTGTTTTGTAATTACACTGCTGCAGCAAGCAACGATCCCAAC---CTGTTCTGGTACCGTCAGAAAACCAGCGGATCCGTGGAGTATCTAGTACAGAGAAGCAAATATATC------AGGAACCAGGAAAGATTTCCA---GGAGATCGGCTTTCCTCGGATTTTGACCATGTGAACCACAATATCCAGCTGAAAGTGCTGAAAACAGAACTGACAGACTCCGCAGTGTATTACTGCGCTCT----------AA----------------------------------GGAATGATGGCACCAACAAGCTTATCTTTGGAGGTGGGACCAGACTGACAG…
aV1.1J_T17_100710	GATTCTGTATCACAAACACCGCTTGTAATCATAGTGACTGAG---GGAGATGATGTCCAGTTGTTTTGTAATTACACTGCTGCAGCAAGCAACGATCCCAAC---CTGTTCTGGTACCGTCAGAAAACCAGCGGATCCGTGGAGTATCTAGTACAGAGAAGCAAATATATC------AGGAACCAGGAAAGATTTCCA---GGAGATCGGCTTTCCTCGGATTTTGACCATGTGAACCACAATATCCAGCTGAAAGTGCTGAAAACAGAACTGACAGACTCCGCAGTGTATTACTGCGCTCTG---------TGT--------------------------------CGGAATGATGGCACCTACAAGCTTATCTTTGGAGGTGGGACCAGACTGACAG…
aV1.1J_V08_102810	GATTCTGTATCACAAACACCGCTTGTAATCATAGTGACTGAG---GGAGATGATGTCCAGTTGTTTTGTAATTACACTGCTGCAGCAAGCAACGATCCCAAC---CTGTTCTGGTACCGTCAGAAAACCAGCGGATCCGTGGAGTATCTAGTACAGAGAAGCAAATATATC------AGGAACCAGGAAAGATTTCCA---GGAGATCGGCTTTCCTCGGATTTTGACCATGTGAACCACAATATCCAGCTGAAAGTGCTGAAAACAGAACTGACAGACTCCGCAGTGTATTACTGCGCTCTG---------GCGCTGTGG-----------------------------AATGATGGCACCTACAAGCTTATCTTTGGAGGTGGGACCAGACTGACAG…
aV1.1m_T14_080912	GATTCTGTATCACAAACACCGCTTGTAATCATAGTGACTGAG---GGAGATGATGTCCAGTTGTTTTGTAATTACACTGCTGCAGCAAGCAACGATCCCAAC---CTGTTCTGGTACCGTCAGAAAACCAGCGGATCCGTGGAGTATCTAGTACAGAGAAGCAAATATATC------AGGAACCAGGAAAGATTTCCA---GGAGATCGGCTTTCCTCGGATTTTGACCATGTGAACCACAATATCCAGCTGAAAGTGCTGAAAACAGAACTGACAGACTCCGCAGTGTATTACTGCGCTCTGA--------TCCGCTTACG---------------------------------TGGCACCAACAACCTTATCTTTGGAGGTGGGACCAGACTGATCG…
aV1.1J_V07_091410	GATTCTGTATCACAAACACCGCTTGTAATCATAGTGACTGAG---GGAGATGATGTCCAGTTGTTTTGTAATTACACTGCTGCAGCAAGCAACGATCCCAAC---CTGTTCTGGTACCGTCAGAAAACCAGCGGATCCGTGGAGTATCTAGTACAGAGAAGCAAATATATC------AGGAACCAGGAAAGATTTCCA---GGAGATCGGCTTTCCTCGGATTTTGACCATGTGAACCACAATATCCAGCTGAAAGTGCTGAAAACAGAACTGACAGACTCCGCAGTGTATTACTGCGCTCTG---------TCCCCT--------------------------------------GATAACAACAGGCTTATCTTTGGAGGTGGCACCAGACTAACAG…
aV1.1m_T13_060512	GATTCTGTATCACAAACACCGCTTGTAATCATAGTGACTGAG---GGAGATGATGTCCAGTTGTTTTGTAATTACACTGCTGCAGCAAGCAACGATCCCAAC---CTGTTCTGGTACCGTCAGAAAACCAGCGGATCCGTGGAGTATCTAGTACAGAGAAGCAAATATATC------AGGAACCAGGAAAGATTTCCA---GGAGATCGGCTTTCCTCGGATTTTGACCATGTGAACCACAATATCCAGCTGAAAGTGCTGAAAACAGAACTGACAGACTCCGCAGTGTATTACTGCGCTCT----------CCAAAAAAAT----------------------------------GATAACAACAGGCTTATCTTTGGAGGTGGCACCAGACTAACAG…
aV1.1J_V09_110210	GATTCTGTATCACAAACACCGCTTGTAATCATAGTGACTGAG---GGAGATGATGTCCAGTTGTTTTGTAATTACACTGCTGCAGCAAGCAACGATCCCAAC---CTGTTCTGGTACCGTCAGAAAACCAGCGGATCCGTGGAGTATCTAGTACAGAGAAGCAAATATATC------AGGAACCAGGAAAGATTTCCA---GGAGATCGGCTTTCCTCGGATTTTGACCATGTGAACCACAATATCCAGCTGAAAGTGCTGAAAACAGAACTGACAGACTCCGCAGTGTATTACTGCGCTCTGAGA------TCC-----------------------------------GAGTATGATGGCTACAAGCTTATCTTTGGAGGTGGGACCAGACTGACAG…
aV1.1J_V05_101310	GATTCTGTATCACAAACACCGCTTGTAATCATAGTGACTGAG---GGAGATGATGTCCAGTTGTTTTGTAATTACACTGCTGCAGCAAGCAACGATCCCAAC---CTGTTCTGGTACCGTCAGAAAACCAGCGGATCCGTGGAGTATCTAGTACAGAGAAGCAAATATATC------AGGAACCAGGAAAGATTTCCA---GGAGATCGGCTTTCCTCGGATTTTGACCATGTGAACCACAATATCCAGCTGAAAGTGCTGAAAACAGAACTGACAGACTCCGCAGTGTATTACTGCGCTCTGAGA------CCGGGA--------------------------------------GGCGTTGGCAAGCTTATCTTTGGAGGTGGGACCAGACTGACAG…
aV1.1J_V20_110210	GATTCTGTATCACAAACACCGCTTGTAATCATAGTGACTGAG---GGAGATGATGCGCAGTTGTTTTGTAATTACACTGCTGAGGCAAACAACGATCCCAAC---CTGTTCTGGTACCGTCAGAAAACCAGCGGATCCGTGGAGTATCTAATACAGAGAAGCAAATATATC------AGGAACCAGGAAAGATTTCCA---GGAGATCGGCTTTCCTCGGATTTTGACCATGTGAACCACACCATCCAGCTGAAAGTGCTGAAAACAGAACTGACAGACTCCTTTGTGTATTACTGCGCC------------TCCTGCGAT-----------------------------------GCAACCAACAAGCTTACCTTTGGCGGTGGGACCACCCTGATAG…
aV1.1m_T17_072610	GATTCTGTATCACAAACACCGCTTGTAATCATAGTGACTGAG---GGAGATGATGTCCAGTTGTTTTGTAATTACACTGCTGCAGCAAGCAACGATCCCAAC---CTGTTCTGGTACCGTCAGAAAACCAGCGGATCCGTGGAGTATCTAGTACAGAGAAGCAAATATATC------AGGAACCAGGAAAGATTTCCA---GGAGATCGGCTTTCCTCGGATTTTGACCATGTGAACCACAATATCCAGCTGAAAGTGCTGAAAACAGAACTGACAGACTCCGCAGTGTATTACTGCGCTCTGA--------TCCGCTTACG---------------------------------TGGCACCAACAACCTTATCTTTGGAGGTGGGACCAGACTGATCG…
aV1.1m_T13_072610	GATTCTGTATCACAAACACCGCTTGTAATCATAGTGACTGAG---GGAGATGATGTCCAGTTGTTTTGTAATTACACTGCTGCAGCAAGCAACGATCCCAAC---CTGTTCTGGTACCGTCAGAAAACCAGCGGATCCGTGGAGTATCTAGTACAGAGAAGCAAATATATC------AGGAACCAGGAAAGATTTCCA---GGAGATCGGCTTTCCTCGGATTTTGACCATGTGAACCACAATATCCAGCTGAAAGTGCTGAAAACAGAACTGACAGACTCCGCAGTGTATTACTGCGCTCT----------CCGCGC----------------------------------TGGAGCTGGTTACAAGCTTACCTTTGGACAGGGGACAAAGTTAACCG…
aV1.1J_V18_090110	GATTCTGTATCACAAACACCGCTTGTAATCATAGTGACTGAG---GGAGATGATGTCCAGTTGTTTTGTAATTACACTGCTGCAGCAAGCAACGATCCCAAC---CTGTTCTGGTACCGTCAGAAAACCAGCGGATCCGTGGAGTATCTAGTACAGAGAAGCAAATATATC------AGGAACCAGGAAAGATTTCCA---GGAGATCGGCTTTCCTCGGATTTTGACCATGTGAACCACAATATCCAGCTGAAAGTGCTGAAAACAGAACTGACAGACTCCGCAGTGTATTACTGCGCTCTGAGA------CCCGGCGCT--------------------------------GGAGGCAATGACAAGCTTATATTTGGAAGTGGGACCAAGGTGACTG…
aV1.1m_T14_060512	GATTCTGTATCACAAACACCGCTTGTAATCATAGTGACTGAG---GGAGATGATGTCCAGTTGTTTTGTAATTACACTGCTGCAGCAAGCAACGATCCCAAC---CTGTTCTGGTACCGTCAGAAAACCAGCGGATCCGTGGAGTATCTAGTACAGAGAAGCAAATATATC------AGGAACCAGGAAAGATTTCCA---GGAGATCGGCTTTCCTCGGATTTTGACCATGTGAACCACAATATCCAGCTGAAAGTGCTGAAAACAGAACTGACAGACTCCGCAGTGTATTACTGCGCTGTGAAC------CTTACT-----------------------------------GGAGGCAATGACAAGCTTATATTTGGAAGTGGGACCAAGGTGACTG…
aV1.1J_V21_101310	GATTCTGTATCACAAACACCAGCTGTAATCGTAGTGACTGAG---GGAACTGATGTCCAGTTCTTTTGTAATTACACTGTTGCAGCACCCATGGATCCCAAT---CTGTTCTGGTACCTTCAGAAAACCAGCGGATCCGTGGCTTATCTAGTACAGAGAAGCAAATATATC------AAGAACCAGGAAAGATTTCCA---GGAGATCGACTTTCCTCGGATTTTGACCATGTGAACCACAATATCCAACTGAAAGTGATGAAAACAGAACTGACAGACTCCGCAGTGTATTACTGTGCTTTGA--------CA------------------------------------------AGTTTGGACGTGCTAACATTTGGATCTGGGACCAAGCTGACGG…
aV1.1B_A_419.40	GATTCTGTATCACAAACACCGCTTGTAATCATAGTGACTGAG---GGAGATGATGTCCAGTTGTTTTGTAATTACACTGCTGCAGCAAGCAACGATCCCAAC---CTGTTCTGGTACCGTCAGAAAACCAGCGGATCCGTGGAGTATCTAGTACAGAGAAGCAAATATATC------AGGAACCAGGAAAGATTTCCA---GGAGATCGGCTTTCCTCGGATTTTGACCATGTGAACCACAATATCCAGCTGAAAGTGCTGAAAACAGAACTGACAGACTCCGCAGTGTATTACTGCGCTCTGA--------CAACA---------------------------------TCTGGGGGTTACAGCAAAACAGTATTTGGAGCTGGGACCAGACTCATCG…
aV1.1J_V17_101310	GATTCTGTATCACAAACGCCGCTGCGAATCATAGTGACTGAG---GGAGATGATGTCCAGTTGTTTTGTAATTGGACTACTGCAGCAACCGCCGATCCCAGC---CTGTTCTGGTACCGTCAGAGAACCAGCGGTTCCGTGGAGTATCTAGTACAGAGAAGCAAGTATATC------AGGAACCAGGAAAGATTTCCA---GGAGATCGCGTTTCCTCGGATTTTGACCATGTGAACCACAATATCCAGCTGAAAGTGCCTAAAACAGAACTGACAGACACCGCAGTGTATTACTGCGCTCT----------ATCA-------------------------------------AATGATGGCATCAGCCTTATCTTTGGCTCTGGGACCAGACTGACAG…
aV2.1m_T22_071212	GATTCTGTCTCACAAACAGCGGCTGCAATTGCAGTGAATGAG---GGTGATGATGTCCTGTTGTCCTGTAATTACTCT---ACAACAAGTAGCAACCCTTAC---CTGTTCTGGTACCGCCAACATTCCAGGGGGTCCATGCATTTTCTACTCCAGAAAAACCGATATAGT------GAGAAACCGGCGACTTTTATC---AAGGACAGGCTTTCCTTGGATTTTGATCATGTGAACCATACTATCCAGATGGGATTGTTGAAAACAGAACTATCAGACTCCGCAGTGTATTTCTGCGCACTGA--------TTCGCCGGTAT---------------------------------GATAACACCAAGCTTATCTTTGGAGAAGGGACCAGACTAACAG…
aV2.1m_T23_071612	GATTCTGTCTCACAAACAGCGGCTGCAATTGCAGTGAATGAG---GGTGATGATGTCCTGTTGTCCTGTAATTACTCT---ACAACAAGTAGCAACCCTTAC---CTGTTCTGGTACCGCCAACATTCCAGGGGGTCCATGCATTTTCTACTCCAGAAAAACCGATATAGT------GAGAAACCGGCGACTTTTATC---AAGGACAGGCTTTCCTTGGATTTTGATCATGTGAACCATACTATCCAGATGGGATTGTTGAAAACAGAACTATCAGACTCCGCAGTGTATTTCTGCGCACTGA--------TTCGCCGGTAT---------------------------------GATAACACCAAGCTTATCTTTGGAGAAGGGACCAGACTAACAG…
aV2.1m_T08_071212	GATTCTGTCTCACAAACAGCGGCTGCAATTGCAGTGAATGAG---GGTGATGATGTCCTGTTGTCCTGTAATTACTCT---ACAACAAGTAGCAACCCTTAC---CTGTTCTGGTACCGCCAACATTCCAGGGGGTCCATGCATTTTCTACTCCAGAAAAACCGATATAGT------GAGAAACCGGCGACTTTTATC---AAGGACAGGCTTTCCTTGGATTTTGATCATGTGAACCATACTATCCAGATGGGATTGTTGAAAACAGAACTATCAGACTCCGCAGTGTATTTCTGCGCACTGA--------TTCGCCGGTAT---------------------------------GATAACACCAAGCTTATCTTTGGAGAAGGGACCAGACTAACAG…
aV2.1m_T14_070612	GATTCTGTCTCACAAACAGCGGCTGCAATTGCAGTGAATGAG---GGTGATGATGTCCTGTTGTCCTGTAATTACTCT---ACAACAAGTAGCAACCCTTAC---CTGTTCTGGTACCGCCAACATTCCAGGGGGTCCATGCATTTTCTACTCCAGAAAAACCGATATAGT------GAGAAACCGGCGACTTTTATC---AAGGACAGGCTTTCCTTGGATTTTGATCATGTGAACCATACTATCCAGATGGGATTGTTGAAAACAGAACTATCAGACTCCGCAGTGTATTTCTGCGCACTGA--------TTCGCCGGTAT---------------------------------GATAACACCAAGCTTATCTTTGGAGAAGGGACCAGACTAACAG…
aV2.1m_T05_072012	GATTCTGTCTCACAAACAGCGGCTGCAATTGCAGTGAATGAG---GGTGATGATGTCCTGTTGTCCTGTAATTACTCT---ACAACAAGTAGCAGCCCTTAC---CTGTTCTGGTACCGCCAACATTCCAGGGGGTCCATGCATTTTCTGCTCCAGAAAAACCGATATAGT------GAGAAACCGGCGACTTTTATC---AAGGACAGGCTTTCCTTGGATTTTGATCATGTGAACCATACTATCCAGATGGGATTGTTGAAAACAGAACTATCAGACTCCGCAGTGTATTTCTGCGCACTGA--------TTCGCCGGTAT---------------------------------GATAACACCAAGCTTATCTTTGGAGAAGGGACCAGACTAACAG…
aV2.2m_T04_071212	GATTCTGTCTCACAAACACCGGCCACAATCACAGTGAATGAA---GGGGAAGATGGCCCGTTATTCTGTAATTACACAATTACATCAAGCAGTAGTCCATAT---TTGTTCTGGTACCGTCAGCATTCCAGCGGTTCCATGGAGTATGTTCTAATGAGAAACCAATATACC------AGGACAACAGAAAGACTTCCA---GGAGACAGGTTTTCTTCGGAATTTGATCATGTGAACCGGACTATCCAATTTAACGTGTTGAACTCAGAACTGACAGACTCCGCAGTGTATTACTGTGCACTG---------CGGACTGGAGGGTTTACA-----------------------------------AAGCTTATCTTCGGACAGGGGACAAAGTTAACCG…
aV2.2m_T11_072012	GATTCTGTCTCACAAACACCGGCCACAATCACAGTGAATGAA---GGGGAAGATGGCCCGTTATTCTGTAATTACACAATTACATCAAGCAGTAGTCCATAT---TTGTTCTGGTACCGTCAGCATTCCAGCGGTTCCATGGAGTATGTTCTAATGAGAAACCAATATACC------AGGACAACAGAAAGACTTCCA---GGAGACAGGTTTTCTTCGGAATTTGATCATGTGAACCGGACTATCCAATTTAACGTGTTGAACTCAGAACTGACAGACTCCGCAGTGTATTACTGTGCACTG---------CGGACTGGAGGGTTTACA-----------------------------------AAGCTTATCTTCGGACAGGGGACAAAGTTAACCG…
aV2.3m_T11_070612	GATTCTGTCTCACAAACAGAGGCTGCAATTGCAGTGAATGAG---GGTGACGATGTCCTGTTGTCCTGTAATTACAAT---ACAACAAACAGCAACCCTTCC---CTGTTCTGGTACCGTCAACATTCCAGGGGGTCCATGCATTTTCTACTGTATAAAAACCGATATAGT------GAGAAACAAGCGAGTTTTCTA---AATGACCGGCTTTCCTTGGATTTTGATCATGTGAAACGCACTATCCAGGTGAGAGTGTTAAAAGCAGAACTATCAGACTCCGCAGTGTATTTCTGCGCACTGAA-------CCGGTCGAAT-------------------------------GGAGTAGCTGATCAGCTTATCTTTGGAGAGGGGACAAAGTTGACCG…
aV2.3m_T24_080212	GATTCTGTCTCACAAACAGAGGCTGCAATTGCAGTGAATGAG---GGTGACGATGTCCTGTTGTCCTGTAATTACAAT---ACAACAAACAGCAACCCTTCC---CTGTTCTGGTACCGTCAACATTCCAGGGGGTCCATGCATTTTCTACTGTATAAAAACCGATATAGT------GAGAAACAAGCGAGTTTTCTA---AATGACCGGCTTTCCTTGGATTTTGATCATGTGAAACGCACTATCCAGGTGAGAGTGTTAAAAGCAGAACTATCAGACTCCGCAGTGTATTTCTGCGCACTGAA-------CCGGTCGAAT-------------------------------GGAGTAGCTGATCAGCTTATCTTTGGAGAGGGGACAAAGTTGACCG…
aV2.1B_A419.3	GATTCTGTCTCACAAACAGCGGCTGCAATTGCAGTGAATGAG---GGTGATGATGTCCTGTTGTCCTGTAATTACTCT---ACAACAAGTAGCAACCCTTAC---CTGTTCTGGTACCGCCAACATTCCAGGGGGTCCATGCATTTTCTACTCCAGAAAAACCGATATAGT------GAGAAACCGGCGACTTTTATC---AAGGACAGGCTTTCCTTGGATTTTGATCATGTGAACCATACTATCCAGATGGGATTGTTGAAAACAGAACTATCAGACTCCGCAGTGTATTTCTGCGCACTG---------TGGCC--------------------------------------TGGCACCAGGAAGCTTATCTTTGGAGATGGGACCAGACTGATCG…
aV2.1J_T43_100410	GATTCTGTCTCACAAACAGCGGCTGCAATTGCAGTGAATGAG---GGTGATGATGTCCTGTTGTCCTGTAATTACTCT---ACAACAAGTAGCAACCCTTAC---CTGTTCTGGTACCGCCAACATTCCAGGGGGTCCATGCATTTTCTACTCCAGAAAAACCGATATAGT------GAGAAACCGGCGACTTTTATC---AAGGACAGGCTTTCCTTGGATTTTGATCATGTGAACCATACTATCCAGATGGGATTGTTGAAAACAGAACTATCAGACTCCGCAGTGTATTTCTGCGCACTGAA-------CCCC-------------------------------------------ACTGACAGACTTATCTTTGGAGGTGGGACCAGACTGACAG…
aV2.1J_V06_091410	GGCTCTGTCTCACAAACAGCGACTGCAATTGTCGTGACTGAA---GATGATGATGTCCTGTTGTCCTGTAATTACTCT---ACAACAAGTGCCAACCCTTAC---CTACTCTGGTACCGCCAACATTCCAGGGGGTCCATGCATTTTCTAATCCAGAAAAACCGATATAGT------GAGAAACCGGCGAACTTTATC---AAGGACAGACTCTCCTTGGATCTTGATCATGTGAACCATAAGATCCAGTTAAGATTTACGAAAACAGAACTATCAGACTCCGCAGTGTATTTCTGCGCACTG---------GAT-----------------------------------------GATAACACCAAACTTATATTTGGAGAAGGGACTAGAGTAACAG…
aV2.2m_T13_080212	GATTCTGTCACTCAGACACCGGCTTCAATCTCAGTGAATGAG---AAAGATAATGCCCAGCTGTTTTGTAACTACAC---TACAACAAGCAACATTCCTTAT---CTTTTCTGGTACTATCAACGTTTAAGCGGCTCCATGGAGTTTCTATTATCCAGAAACCAATATAGT------GAGAACACAGTGAGATTTCCA---GGTGACCGGTTTTCCGCAGACTTTGATCACGTGAACCACAAAATCGAGCTGAATATATTGAAAACAGAACTAACGGACTCCACAGTGTATTTCTGCGC-------------TTTGAGAAAGAAT-------------------------GCTGGAGGGTTTAATAAGTTTATCTTTGGAGAGGGGACAAAGTTAACCG…
aV2.2J_V22_110210	GATTCTGTCTCACAAACACCGGCCACAATCACAGTGAATGAA---GGGGAAGATGGCCCGTTATTCTGTAATTACACAGTTACATCAAGCAATAGTCCATAT---TTGTTCTGGTACCGTCAGCATTTCAACGGTTCCATAGATTATGTGTTAAAGAGAAACCAATATACC------AGGAAAACAGAAAGACTTCCA---GGAGACAAATTTTCTTCGGAATTTGATCATGTGAACCGGACTATCCAATTGAAAGTGTTGAACGCAGAACTGACAGACTCCGCAGTGTATTACTGTGCACTG---------TACCCTGGATTCTCTGAACAA-----------------------------------CTTATCTTTGGACAGGGGACAAAGGTGACCG…
aV2.3J_V07_110210	GATTCTGTCTCACAAACAGAGGCTGCAATTGCAGTGAATGAG---GGTGACGATGTCCTGTTGTCCTGTAATTACAAT---ACAACAAACAGCAACCCTTCC---CTGTTCTGGTACCGTCAACATTCCAGGGGGTCCATGCATTTTCTACTGTATAAAAACCGATATAGT------GAGAAACAAGCGAGTTTTCTA---AATGACCGGCTTTCCTTGGATTTTGATCATGTGAAACGCACTATCCAGGTGAGAGTGTTAAAAGCAGAACTATCAGACTCCGCAGTGTATTTCTGCGCAC-----------CGAGCCGCCGCATGGCTGATNN------------------GGAGCTGGTTACAAGCTTACCTTTTGGACAGGGGGACAA--------…
aV2.3B_A_419.9	GATTCTGTCTCACAAACAGAGGCTGCAATTGCAGTGAATGAG---GGTGACGATGTCCTGTTGTCCTGTAATTACAAT---ACAACAAACAGCAACCCTTCC---CTGTTCTGGTACCGTCAACATTCCAGGGGGTCCATGCATTTTCTACTGTATAAAAACCGATATAGC------GAGAAACAAGCGAGTTTTCTA---AATGACCGGCTTTCCTTGGATTTTGATCATGTGAAACGCACTATCCAGGTGAGAGTGTTAAAAGCAGAACTATCAGACTCCGCAGTGTATTTCTGCGCACTG--------------------------------------------------AATGCTAACTACGAGCTTATCTTCGGAGGTGGGACAAGACTGGTAG…
aV2.3m_T23_071712	GTTTCTGTCTCACAAACAGAGGCTGCAATTGCAGTGAATGAG---GGTGACGATGTCCTGTTGTCCTGTAATTACAAT---ACAACAAACAGCAACCCTTCC---CTGTTCTGGTACCGTCAACATTCCAGGGGGTCCATGCATTTTCTACTGTATAAAAACCGATATAGT------GAGAAACAAGCGAGTTTTCTA---AATGACCGGCTTTCCTTGGATTTTGATCATGTGAAACGCACTATCCAGGTGAGAGTGTTAAAAGCAGAACTATCAGACTCCGCAGTGTATTTCTGCGCAC-----------------------------------------------GGAATGATGGCACCTACAAGCTTATCTTTGGAGGTGGGACCAGACTGACAG…
aV2.3J_V12_102810	GATTCTGTCTCACAAACAGCGGCTGCAATTGCAGTGAATGAG---GGTGACGATGTCCTGTTGTCCTGTAATTACAAT---ACAACAAACAGCAACCCTTCC---CTGTTCTGGTACCGTCAACATTCCAGGGGGTCCATGCATTTTCTACTGTATAAAAACCGATATAGT------GAGAAACAAGCGAGTTTTCTA---AATGACCGGCTTTCCTTGGATTTTGATCATGTGAAACGCACTATCCAGGTGAGAGTGTTAAAAGCAGAACTATCAGACTCCGCAGTGTATTTCTGCGCACTGAA-------CCGACCT----------------------------------GATGGCACCAACAACCTTATCTTTGGAGGTGGGACCAGACTGATCG…
aV3.1m_T03_060612	GATCCAGTTTCCCAGAGCCCACCTCAGTTACCGGTTGAGGAA---GGACAAACGGTAATGTTGAACTGTAGTTACAAA---TCGTTGGTT------GCTACTGCTCTCTTCTGGTACGTCCAACATCCTGGGGAAGCTCTGAGATATTTACTGAGGGCGTACAAGGATGAAGAGTGGGAGAGCTCACCAGCTTTC------CGTGACCGGTTTTCTGCCAATTTGGACAAAGTCAAAAAAGTGGTCCCTTTGAGAATTAATGAAACCCGTCTGTCTGACTCAGCCATCTATTACTGCGCTCTGAG-------CCCGTTGTCCCCG----------------------------GGAGTAGCTGATCAGCTTATCTTTGGAGAGGGGACAAAGTTGACCG…
aV3.1m_T10_062512	GATCCAGTTTCCCAGAGCCCACCTCAGTTACCGGTTGAGGAA---GGACAAACGGTAATGTTGAACTGTAGTTACAAA---TCGTTGGTT------GCTACTGCTCTCTTCTGGTACGTCCAACATCCTGGGGAAGCTCTGAGATATTTACTGAGGGCGTACAAGGATGAAGAGTGGGAGAGCTCACCAGCTTTC------CGTGACCGGTTTTCTGCCAATTTGGACAAAGTCAAAAAAGTGGTCCCTTTGAGAATTAATGAAACCCGTCTGTCTGACTCAGCCATCTATTACTGCGCTCTGAG-------CCCGTTGTCCCCG----------------------------GGAGTAGCTGATCAGCTTATCTTTGGAGAGGGGACAAAGTTGACCG…
aV3.1m_T02_062512	GATCCAGTTTCCCAGAGCCCACCTCAGTTACCGGTTGAGGAA---GGACAAACGGTAATGTTGAACTGTAGTTACAAA---TCGTTGGTT------GCTACTGCTCTCTTCTGGTACGTCCAACATCCTGGGGAAGCTCTGAGATATTTACTGAGGGCGTACAAGGATGAAGAGTGGGAGAGCTCACCAGCTTTC------CGTGACCGGTTTTCTGCCAATTTGGACAAAGTCAAAAAAGTGGTCCCTTTGAGAATTAATGAAACCCGTCTGTCTGACTCAGCCATCTATTACTGCGCTCTGAG-------CCCGTTGTCCCCG----------------------------GGAGTAGCTGATCAGCTTATCTTTGGAGAGGGGACAAAGTTGACCG…
aV3.1m_T24_062012	GATCCAGTTTCCCAGAGCCCACCTCAGTTACCGGTTGAGGAA---GGACAAACGGTAATGTTGAACTGTAGTTACAAA---TCGTTGGTT------GCTACTGCTCTCTTCTGGTACGTCCAACATCCTGGGGAAGCTCTGAGATATTTACTGAGGGCGTACAAGGATGAAGAGTGGGAGAGCTCACCAGCTTTC------CGTGACCGGTTTTCTGCCAATTTGGACAAAGTCAAAAAAGTGGTCCCTTTGAGAATTAATGAAACCCGTCTGTCTGACTCAGCCATCTATTACTGCGCTCTGAG-------CCCGTTGTCCCCG----------------------------GGAGTAGCTGATCAGCTTATCTTTGGAGAGGGGACAAAGTTGACCG…
aV3.1m_T14_070912	GATCCAGTTTCCCAGAGCCCACCTCAGTTACCGGTTGAGGAA---GGACAAACGGTAATGTTGAACTGTAGTTACAAA---TCGTTGGTT------GCTACTGCTCTCTTCTGGTACGTCCAACATCCTGGGGAAGCTCTGAGATATTTACTGAGGGCGTACAAGGATGAAGAGTGGGAGAGCTCACCAGCTTTC------CGTGACCGGTTTTCTGCCAATTTGGACAAAGTCAAAAAAGTGGTCCCTTTGAGAATTAATGAAACCCGTCTGTCTGACTCAGCCATCTATTACTGCGCTCTGAG-------CCCGTTGTCCCCG----------------------------GGAGTAGCTGATCAGCTTATCTTTGGAGAGGGGACAAAGTTGACCG…
aV3.1m_T15_071712	GATCCAGTTTCCCAGAGCCCACCTCAGTTACCGGTTGAGGAA---GGACAAACGGTAATGTTGAACTGTAGTTACAAA---TCGTTGGTT------GCTACTGCTCTCTTCTGGTACGTCCAACATCCTGGGGAAGCTCTGAGATATTTACTGAGGGCGTACAAGGATGAAGAGTGGGAGAGCTCACCAGCTTTC------CGTGACCGGTTTTCTGCCAATTTGGACAAAGTCAAAAAAGTGGTCCCTTTGAGAATTAATGAAACCCGTCTGTCTGACTCAGCCATCTATTACTGCGCTCTGAG-------CCCGTTGTCCCCG----------------------------GGAGTAGCTGATCAGCTTATCTTTGGAGAGGGGACAAAGTTGACCG…
aV3.1m_T03_062612	GATCCAGTTTCCCAGAGCCCACCTCAGTTACCGGTTGAGGAA---GGACAAACGGTAATGTTGAACTGTAGTTACAAA---TCGTTGGTT------GCTACTGCTCTCTTCTGGTACGTCCAACATCCTGGGGAAGCTCTGAGATATTTACTGAGGGCGTACAAGGATGAAGAGTGGGAGAGCTCACCAGCTTTC------CGTGACCGGTTTTCTGCCAATTTGGACAAAGTCAAAAAAGTGGTCCCTTTGAGAATTAATGAAACCCGTCTGTCTGACTCAGCCATCTATTACTGCGCTCTGAG-------CCCGTTGTCCCCG----------------------------GGAGTAGCTGATCAGCTTATCTTTGGAGAGGGGACAAAGTTGACCG…
aV3.1m_T04_060512	GATCCAGTTTCCCAGAGCCCACCTCAGTTACCGGTTGAGGAA---GGACAAACGGTAATGTTGAACTGTAGTTACAAA---TCGTTGGTT------GCTACTGCTCTCTTCTGGTACGTCCAACATCCTGGGGAAGCTCTGAGATATTTACTGAGGGCGTACAAGGATGAAGAGTGGGAGAGCTCACCAGCTTTC------CGTGACCGGTTTTCTGCCAATTTGGACAAAGTCAAAAAAGTGGTCCCTTTGAGAATTAATGAAACCCGTCTGTCTGACTCAGCCATCTATTACTGCGCTCTGAG-------CCCGTTGTCCCCG----------------------------GGAGTAGCTGATCAGCTTATCTTTGGAGAGGGGACAAAGTTGACCG…
aV3.1m_T24B_060712	GATCCAGTTTCCCAGAGCCCACCTCAGTTACCGGTTGAGGAA---GGACAAACGGTAATGTTGAACTGTAGTTACAAA---TCGTTGGTT------GCTACTGCTCTCTTCTGGTACGTCCAACATCCTGGGGAAGCTCTGAGATATTTACTGAGGGCGTACAAGGATGAAGAGTGGGAGAGCTCACCAGCTTTC------CGTGACCGGTTTTCTGCCAATTTGGACAAAGTCAAAAAAGTGGTCCCTTTGAGAATTAATGAAACCCGTCTGTCTGACTCAGCCATCTATTACTGCGCTCTGAG-------CCCGTTGTCCCCG----------------------------GGAGTAGCTGATCAGCTTATCTTTGGAGAGGGGACAAAGTTGACCG…
aV3.1m_T01_060512	GATCCAGTTTCCCAGAGCCCACCTCAGTTACCGGTTGAGGAA---GGACAAACGGTAATGTTGAACTGTAGTTACAAA---TCGTTGGTT------GCTACTGCTCTCTTCTGGTACGTCCAACATCCTGGGGAAGCTCTGAGATATTTACTGAGGGCGTACAAGGATGAAGAGTGGGAGAGCTCACCAGCTTTC------CGTGACCGGTTTTCTGCCAATTTGGACAAAGTCAAAAAAGTGGTCCCTTTGAGAATTAATGAAACCCGTCTGTCTGACTCAGCCATCTATTACTGCGCTCTGAG-------CCCGTTGTCCCCG----------------------------GGAGTAGCTGATCAGCTTATCTTTGGAGAGGGGACAAAGTTGACCG…
aV3.1m_T21_052410	GATCCAGTTTCCCAGAGCCCACCTCAGTTACCGGTTGAGGAA---GGACAAACGGTAATGTTGAACTGTAGTTACAAA---TCGTTGGTT------GCTACTGCTCTCTTCTGGTACGTCCAACATCCTGGGGAAGCTCTGAGATATTTACTGAGGGCGTACAAGGATGAAGAGTGGGAGAGCTCACCAGCTTTC------CGTGACCGGTTTTCTGCCAATTTGGACAAAGTCAAAAAAGTGGTCCCTTTGAGAATTAATGAAACCCGTCTGTCTGACTCAGCCATCTATTACTGCGCTCTGAG-------CCCGTTGTCCCCG----------------------------GGAGTAGCTGATCAGCTTATCTTTGGAGAGGGGACAAAGTTGACCG…
aV3.1m_T13_061812	GATCCAGTTTCCCAGAGCCCACCTCAGTTACCGGTTGAGGAA---GGACAAACGGTAATGTTGAACTGTAGTTACAAA---TCGTTGGTT------GCTACTGCTCTCTTCTGGTACGTCCAACATCCTGGGGAAGCTCTGAGATATTTACTGAGGGCGTACAAGGATGAAGAGTGGGAGAGCTCACCAGCTTTC------CGTGACCGGTTTTCTGCCAATTTGGACAAAGTCAAAAAAGTGGTCCCTTTGAGAATTAATGAAACCCGTCTGTCTGACTCAGCCATCTATTACTGCGCTCTGAG-------CCCGTTGTCCCCG----------------------------GGAGTAGCTGATCAGCTTATCTTTGGAGAGGGGACAAAGTTGACCG…
aV3.1m_T17_061812	GATCCAGTTTCCCAGAGCCCACCTCAGTTACCGGTTGAGGAA---GGACAAACGGTAATGTTGAACTGTAGTTACAAA---TCGTTGGTT------GCTACTGCTCTCTTCTGGTACGTCCAACATCCTGGGGAAGCTCTGAGATATTTACTGAGGGCGTACAAGGATGAAGAGTGGGAGAGCTCACCAGCTTTC------CGTGACCGGTTTTCTGCCAATTTGGACAAAGTCAAAAAAGTGGTCCCTTTGAGAATTAATGAAACCCGTCTGTCTGACTCAGCCATCTATTACTGCGCTCTGAG-------CCCGTTGTCCCCG----------------------------GGAGTAGCTGATCAGCTTATCTTTGGAGAGGGGACAAAGTTGACCG…
aV3.1m_T05_071712	GATCCAGTTTCCCAGAGCCCACCTCAGTTACCGGTTGAGGAA---GGACAAACGGTAATGTTGAACTGTAGTTACAAA---TCGTTGGTT------GCTACTGCTCTCTTCTGGTACGTCCAACATCCTGGGGAAGCTCTGAGATATTTACTGAGGGCGTACAAGGATGAAGAGTGGGAGAGCTCACCAGCTTTC------CGTGACCGGTTTTCTGCCAATTTGGACAAAGTCAAAAAAGTGGTCCCTTTGAGAATTAATGAAACCCGTCTGTCTGACTCAGCCATCTATTACTGCGCTCTGAG-------CCCGTTGTCCCCG----------------------------GGAGTAGCTGATCAGCTTATCTTTGGAGAGGGGACAAAGTTGACCG…
aV3.1m_T20_052410	GATCCAGTTTCCCAGAGCCCACCTCAGTTACCGGTTGAGGAA---GGACAAACGGTAATGTTGAACTGTAGTTACAAA---TCGTTGGTT------GCTACTGCTCTCTTCTGGTACGTCCAACATCCTGGGGAAGCTCTGAGATATTTACTGAGGGCGTACAAGGATGAAGAGTGGGAGAGCTCACCAGCTTTC------CGTGACCGGTTTTCTGCCAATTTGGACAAAGTCAAAAAAGTGGTCCCTTTGAGAATTAATGAAACCCGTCTGTCTGACTCAGCCATCTATTACTGCGCTCTGAG-------CCCGTTGTCCCCG----------------------------GGAGTAGCTGATCAGCTTATCTTTGGAGAGGGGACAAAGTTGACCG…
aV3.1m_T07_062512	GATCCAGTTTCCCAGAGCCCACCTCAGTTACCGGTTGAGGAA---GGACAAACGGTAATGTTGAACTGTAGTTACAAA---TCGTTGGTT------GCTACTGCTCTCTTCTGGTACGTCCAACATCCTGGGGAAGCTCTGAGATATTTACTGAGGGCGTACAAGGATGAAGAGTGGGAGAGCTCACCAGCTTTC------CGTGACCGGTTTTCTGCCAATTTGGACAAAGTCAAAAAAGTGGTCCCTTTGAGAATTAATGAAACCCGTCTGTCTGACTCAGCCATCTATTACTGCGCTCTGAG-------CCCGTTGTCCCCG----------------------------GGAGTAGCTGATCAGCTTATCTTTGGAGAGGGGACAAAGTTGACCG…
aV3.1m_T24_062612	GATCCAGTTTCCCAGAGCCCACCTCAGTTACCGGTTGAGGAA---GGACAAACGGTAATGTTGAACTGTAGTTACAAA---TCGTTGGTT------GCTACTGCTCTCTTCTGGTACGTCCAACATCCTGGGGAAGCTCTGAGATATTTACTGAGGGCGTACAAGGATGAAGAGTGGGAGAGCTCACCAGCTTTC------CGTGACCGGTTTTCTGCCAATTTGGACAAAGTCAAAAAAGTGGTCCCTTTGAGAATTAATGAAACCCGTCTGTCTGACTCAGCCATCTATTACTGCGCTCTGAG-------CCCGTTGTCCCCG----------------------------GGAGTAGCTGATCAGCTTATCTTTGGAGAGGGGACAAAGTTGACCG…
aV3.1m_T15_062512	GATCCAGTTTCCCAGAGCCCACCTCAGTTACCGGTTGAGGAA---GGACAAACGGTAATGTTGAACTGTAGTTACAAA---TCGTTGGTT------GCTACTGCTCTCTTCTGGTACGTCCAACATCCTGGGGAAGCTCTGAGATATTTACTGAGGGCGTACAAGGATGAAGAGTGGGAGAGCTCACCAGCTTTC------CGTGACCGGTTTTCTGCCAATTTGGACAAAGTCAAAAAAGTGGTCCCTTTGAGAATTAATGAAACCCGTCTGTCTGACTCAGCCATCTATTACTGCGCTCTGAG-------CCCGTTGTCCCCG----------------------------GGAGTAGCTGATCAGCTTATCTTTGGAGAGGGGACAAAGTTGACCG…
aV3.1m_T04_071712	GATCCAGTTTCCCAGAGCCCACCTCAGTTACCGGTTGAGGAA---GGACAAACGGTAATGTTGAACTGTAGTTACAAA---TCGTTGGTT------GCTACTGCTCTCTTCTGGTACGTCCAACATCCTGGGGAAGCTCTGAGATATTTACTGAGGGCGTACAAGGATGAAGAGTGGGAGAGCTCACCAGCTTTC------CGTGACCGGTTTTCTGCCAATTTGGACAAAGTCAAAAAAGTGGTCCCTTTGAGAATTAATGAAACCCGTCTGTCTGACTCAGCCATCTATTACTGCGCTCTGAG-------CCCGTTGTCCCCG----------------------------GGAGTAGCTGATCAGCTTATCTTTGGAGAGGGGACAAAGTTGACCG…
aV3.1m_T25_052410	GATCCAGTTTCCCAGAGCCCACCTCAGTTACCGGTTGAGGAA---GGACAAACGGTAATGTTGAACTGTAGTTACAAA---TCGTTGGTT------GCTACTGCTCTCTTCTGGTACGTCCAACATCCTGGGGAAGCTCTGAGATATTTACTGAGGGCGTACAAGGATGAAGAGTGGGAGAGCTCACCAGCTTTC------CGTGACCGGTTTTCTGCCAATTTGGACAAAGTCAAAAAAGTGGTCCCTTTGAGAATTAATGAAACCCGTCTGTCTGACTCAGCCATCTATTACTGCGCTCTGAG-------CCCGTTGTCCCCG----------------------------GGAGTAGCTGATCAGCTTATCTTTGGAGAGGGGACAAAGTTGACCG…
aV3.1m_T23_052410	GATCCAGTTTCCCAGAGCCCACCTCAGTTACCGGTTGAGGAA---GGACAAACGGTAATGTTGAACTGTAGTTACAAA---TCGTTGGTT------GCTACTGCTCTCTTCTGGTACGTCCAACATCCTGGGGAAGCTCTGAGATATTTACTGAGGGCGTACAAGGATGAAGAGTGGGAGAGCTCACCAGCTTTC------CGTGACCGGTTTTCTGCCAATTTGGACAAAGTCAAAAAAGTGGTCCCTTTGAGAATTAATGAAACCCGTCTGTCTGACTCAGCCATCTATTACTGCGCTCTGAG-------CCCGTTGTCCCCG----------------------------GGAGTAGCTGATCAGCTTATCTTTGGAGAGGGGACAAAGTTGACCG…
aV3.1m_T16_061812	GATCCAGTTTCCCAGAGCCCACCTCAGTTACCGGTTGAGGAA---GGACAAACGGTAATGTTGAACTGTAGTTACAAA---TCGTTGGTT------GCTACTGCTCTCTTCTGGTACGTCCAACATCCTGGGGAAGCTCTGAGATATTTACTGAGGGCGTACAAGGATGAAGAGTGGGAGAGCTCACCAGCTTTC------CGTGACCGGTTTTCTGCCAATTTGGACAAAGTCAAAAAAGTGGTCCCTTTGAGAATTAATGAAACCCGTCTGTCTGACTCAGCCATCTATTACTGCGCTCTGAG-------CCCGTTGTCCCCG----------------------------GGAGTAGCTGATCAGCTTATCTTTGGAGAGGGGACAAAGTTGACCG…
aV3.1m_T20_060512	GATCCAGTTTCCCAGAGCCCACCTCAGTTACCGGTTGAGGAA---GGACAAACGGTAATGTTGAACTGTAGTTACAAA---TCGTTGGTT------GCTACTGCTCTCTTCTGGTACGTCCAACATCCTGGGGAAGCTCTGAGATATTTACTGAGGGCGTACAAGGATGAAGAGTGGGAGAGCTCACCAGCTTTC------CGTGACCGGTTTTCTGCCAATTTGGACAAAGTCAAAAAAGTGGTCCCTTTGAGAATTAATGAAACCCGTCTGTCTGACTCAGCCATCTATTACTGCGCTCTGAG-------CCCGTTGTCCCCG----------------------------GGAGTAGCTGATCAGCTTATCTTTGGAGAGGGGACAAAGTTGACCG…
aV3.1m_T06_061812	GATCCAGTTTCCCAGAGCCCACCTCAGTTACCGGTTGAGGAA---GGACAAACGGTAATGTTGAACTGTAGTTACAAA---TCGTTGGTT------GCTACTGCTCTCTTCTGGTACGTCCAACATCCTGGGGAAGCTCTGAGATATTTACTGAGGGCGTACAAGGATGAAGAGTGGGAGAGCTCACCAGCTTTC------CGTGACCGGTTTTCTGCCAATTTGGACAAAGTCAAAAAAGTGGTCCCTTTGAGAATTAATGAAACCCGTCTGTCTGACTCAGCCATCTATTACTGCGCTCTGAG-------CCCGTTGTCCCCG----------------------------GGAGTAGCTGATCAGCTTATCTTTGGAGAGGGGACAAAGTTGACCG…
aV3.1m_T09_052410	GATCCAGTTTCCCAGAGCCCACCTCAGTTACCGGTTGAGGAA---GGACAAACGGTAATGTTGAACTGTAGTTACAAA---TCGTTGGTT------GCTACTGCTCTCTTCTGGTACGTCCAACATCCTGGGGAAGCTCTGAGATATTTACTGAGGGCGTACAAGGATGAAGAGTGGGAGAGCTCACCAGCTTTC------CGTGACCGGTTTTCTGCCAATTTGGACAAAGTCAAAAAAGTGGTCCCTTTGAGAATTAATGAAACCCGTCTGTCTGACTCAGCCATCTATTACTGCGCTCTGAG-------CCCGTTGTCCCCG----------------------------GGAGTAGCTGATCAGCTTATCTTTGGAGAGGGGACAAAGTTGACCG…
aV3.1m_T15_052410	GATCCAGTTTCCCAGAGCCCACCTCAGTTACCGGTTGAGGAA---GGACAAACGGTAATGTTGAACTGTAGTTACAAA---TCGTTGGTT------GCTACTGCTCTCTTCTGGTACGTCCAACATCCTGGGGAAGCTCTGAGATATTTACTGAGGGCGTACAAGGATGAAGAGTGGGAGAGCTCACCAGCTTTC------CGTGACCGGTTTTCTGCCAATTTGGACAAAGTCAAAAAAGTGGTCCCTTTGAGAATTAATGAAACCCGTCTGTCTGACTCAGCCATCTATTACTGCGCTCTGAG-------CCCGTTGTCCCCG----------------------------GGAGTAGCTGATCAGCTTATCTTTGGAGAGGGGACAAAGTTGACCG…
aV3.1m_T10_060612	GATCCAGTTTCCCAGAGCCCACCTCAGTTACCGGTTGAGGAA---GGACAAACGGTAATGTTGAACTGTAGTTACAAA---TCGTTGGTT------GCTACTGCTCTCTTCTGGTACGTCCAACATCCTGGGGAAGCTCTGAGATATTTACTGAGGGCGTACAAGGATGAAGAGTGGGAGAGCTCACCAGCTTTC------CGTGACCGGTTTTCTGCCAATTTGGACAAAGTCAAAAAAGTGGTCCCTTTGAGAATTAATGAAACCCGTCTGTCTGACTCAGCCATCTATTACTGCGCTCTGAG-------CCCGTTGTCCCCG----------------------------GGAGTAGCTGATCAGCTTATCTTTGGAGAGGGGACAAAGTTGACCG…
aV3.1m_T01_071712	GATCCAGTTTCCCAGAGCCCACCTCAGTTACCGGTTGAGGAA---GGACAAACGGTAATGTTGAACTGTAGTTACAAA---TCGTTGGTT------GCTACTGCTCTCTTCTGGTACGTCCAACATCCTGGGGAAGCTCTGAGATATTTACTGAGGGCGTACAAGGATGAAGAGTGGGAGAGCTCACCAGCTTTC------CGTGACCGGTTTTCTGCCAATTTGGACAAAGTCAAAAAAGTGGTCCCTTTGAGAATTAATGAAACCCGTCTGTCTGACTCAGCCATCTATTACTGCGCTCTGAG-------CCCGTTGTCCCCG----------------------------GGAGTAGCTGATCAGCTTATCTTTGGAGAGGGGACAAAGTTGACCG…
aV3.1m_T19_062012	GATCCAGTTTCCCAGAGCCCACCTCAGTTACCGGTTGAGGAA---GGACAAACGGTAATGTTGAACTGTAGTTACAAA---TCGTTGGTT------GCTACTGCTCTCTTCTGGTACGTCCAACATCCTGGGGAAGCTCTGAGATATTTACTGAGGGCGTACAAGGATGAAGAGTGGGAGAGCTCACCAGCTTTC------CGTGACCGGTTTTCTGCCAATTTGGACAAAGTCAAAAAAGTGGTCCCTTTGAGAATTAATGAAACCCGTCTGTCTGACTCAGCCATCTATTACTGCGCTCTGAG-------CCCGTTGTCCCCG----------------------------GGAGTAGCTGATCAGCTTATCTTTGGAGAGGGGACAAAGTTGACCG…
aV3.1m_T23_061812	GATCCAGTTTCCCAGAGCCCACCTCAGTTACCGGTTGAGGAA---GGACAAACGGTAATGTTGAACTGTAGTTACAAA---TCGTTGGTT------GCTACTGCTCTCTTCTGGTACGTCCAACATCCTGGGGAAGCTCTGAGATATTTACTGAGGGCGTACAAGGATGAAGAGTGGGAGAGCTCACCAGCTTTC------CGTGACCGGTTTTCTGCCAATTTGGACAAAGTCAAAAAAGTGGTCCCTTTGAGAATTAATGAAACCCGTCTGTCTGACTCAGCCATCTATTACTGCGCTCTGAG-------CCCGTTGTCCCCG----------------------------GGAGTAGCTGATCAGCTTATCTTTGGAGAGGGGACAAAGTTGACCG…
aV3.1m_T20_061812	GATCCAGTTTCCCAGAGCCCACCTCAGTTACCGGTTGAGGAA---GGACAAACGGTAATGTTGAACTGTAGTTACAAA---TCGTTGGTT------GCTACTGCTCTCTTCTGGTACGTCCAACATCCTGGGGAAGCTCTGAGATATTTACTGAGGGCGTACAAGGATGAAGAGTGGGAGAGCTCACCAGCTTTC------CGTGACCGGTTTTCTGCCAATTTGGACAAAGTCAAAAAAGTGGTCCCTTTGAGAATTAATGAAACCCGTCTGTCTGACTCAGCCATCTATTACTGCGCTCTGAG-------CCCGTTGTCCCCG----------------------------GGAGTAGCTGATCAGCTTATCTTTGGAGAGGGGACAAAGTTGACCG…
aV3.1m_T24_061812	GATCCAGTTTCCCAGAGCCCACCTCAGTTACCGGTTGAGGAA---GGACAAACGGTAATGTTGAACTGTAGTTACAAA---TCGTTGGTT------GCTACTGCTCTCTTCTGGTACGTCCAACATCCTGGGGAAGCTCTGAGATATTTACTGAGGGCGTACAAGGATGAAGAGTGGGAGAGCTCACCAGCTTTC------CGTGACCGGTTTTCTGCCAATTTGGACAAAGTCAAAAAAGTGGTCCCTTTGAGAATTAATGAAACCCGTCTGTCTGACTCAGCCATCTATTACTGCGCTCTGAG-------CCCGTTGTCCCCG----------------------------GGAGTAGCTGATCAGCTTATCTTTGGAGAGGGGACAAAGTTGACCG…
aV3.1m_T23_062512	GATCCAGTTTCCCAGAGCCCACCTCAGTTACCGGTTGAGGAA---GGACAAACGGTAATGTTGAACTGTAGTTACAAA---TCGTTGGTT------GCTACTGCTCTCTTCTGGTACGTCCAACATCCTGGGGAAGCTCTGAGATATTTACTGAGGGCGTACAAGGATGAAGAGTGGGAGAGCTCACCAGCTTTC------CGTGACCGGTTTTCTGCCAATTTGGACAAAGTCAAAAAAGTGGTCCCTTTGAGAATTAATGAAACCCGTCTGTCTGACTCAGCCATCTATTACTGCGCTCTGAG-------CCCGTTGTCCCCG----------------------------GGAGTAGCTGATCAGCTTATCTTTGGAGAGGGGACAAAGTTGACCG…
aV3.1m_T02_062612	GATCCAGTTTCCCAGAGCCCACCTCAGTTACCGGTTGAGGAA---GGACAAACGGTAATGTTGAACTGTAGTTACAAA---TCGTTGGTT------GCTACTGCTCTCTTCTGGTACGTCCAACATCCTGGGGAAGCTCTGAGATATTTACTGAGGGCGTACAAGGATGAAGAGTGGGAGAGCTCACCAGCTTTC------CGTGACCGGTTTTCTGCCAATTTGGACAAAGTCAAAAAAGTGGTCCCTTTGAGAATTAATGAAACCCGTCTGTCTGACTCAGCCATCTATTACTGCGCTCTGAG-------CCCGTTGTCCCCG----------------------------GGAGTAGCTGATCAGCTTATCTTTGGAGAGGGGACAAAGTTGACCG…
aV3.1m_T21B_060712	GATCCAGTTTCCCAGAGCCCACCTCAGTTACCGGTTGAGGAA---GGACAAACGGTAATGTTGAACTGTAGTTACAAA---TCGTTGGTT------GCTACTGCTCTCTTCTGGTACGTCCAACATCCTGGGGAAGCTCTGAGATATTTACTGAGGGCGTACAAGGATGAAGAGTGGGAGAGCTCACCAGCTTTC------CGTGACCGGTTTTCTGCCAATTTGGACAAAGTCAAAAAAGTGGTCCCTTTGAGAATTAATGAAACCCGTCTGTCTGACTCAGCCATCTATTACTGCGCTCTGAG-------CCCGTTGTCCCCG----------------------------GGAGTAGCTGATCAGCTTATCTTTGGAGAGGGGACAAAGTTGACCG…
aV3.1m_T14_062512	GATCCAGTTTCCCAGAGCCCACCTCAGTTACCGGTTGAGGAA---GGACAAACGGTAATGTTGAACTGTAGTTACAAA---TCGTTGGTT------GCTACTGCTCTCTTCTGGTACGTCCAACATCCTGGGGAAGCTCTGAGATATTTACTGAGGGCGTACAAGGATGAAGAGTGGGAGAGCTCACCAGCTTTC------CGTGACCGGTTTTCTGCCAATTTGGACAAAGTCAAAAAAGTGGTCCCTTTGAGAATTAATGAAACCCGTCTGTCTGACTCAGCCATCTATTACTGCGCTCTGAG-------CCCGTTGTCCCCG----------------------------GGAGTAGCTGATCAGCTTATCTTTGGAGAGGGGACAAAGTTGACCG…
aV3.1m_T12_052410	GATCCAGTTTCCCAGAGCCCACCTCAGTTACCGGTTGAGGAA---GGACAAACGGTAATGTTGAACTGTAGTTACAAA---TCGTTGGTT------GCTACTGCTCTCTTCTGGTACGTCCAACATCCTGGGGAAGCTCTGAGATATTTACTGAGGGCGTACAAGGATGAAGAGTGGGAGAGCTCACCAGCTTTC------CGTGACCGGTTTTCTGCCAATTTGGACAAAGTCAAAAAAGTGGTCCCTTTGAGAATTAATGAAACCCGTCTGTCTGACTCAGCCATCTATTACTGCGCTCTGAG-------CCCGTTGTCCCCG----------------------------GGAGTAGCTGATCAGCTTATCTTTGGAGAGGGGACAAAGTTGACCG…
aV3.1m_T21_071712	GATCCAGTTTCCCAGAGCCCACCTCAGTTACCGGTTGAGGAA---GGACAAACGGTAATGTTGAACTGTAGTTACAAA---TCGTTGGTT------GCTACTGCTCTCTTCTGGTACGTCCAACATCCTGGGGAAGCTCTGAGATATTTACTGAGGGCGTACAAGGATGAAGAGTGGGAGAGCTCACCAGCTTTC------CGTGACCGGTTTTCTGCCAATTTGGACAAAGTCAAAAAAGTGGTCCCTTTGAGAATTAATGAAACCCGTCTGTCTGACTCAGCCATCTATTACTGCGCTCTGAG-------CCCGTTGTCCCCG----------------------------GGAGTAGCTGATCAGCTTATCTTTGGAGAGGGGACAAAGTTGACCG…
aV3.1m_T02_071712	GATCCAGTTTCCCAGAGCCCACCTCAGTTACCGGTTGAGGAA---GGACAAACGGTAATGTTGAACTGTAGTTACAAA---TCGTTGGTT------GCTACTGCTCTCTTCTGGTACGTCCAACATCCTGGGGAAGCTCTGAGATATTTACTGAGGGCGTACAAGGATGAAGAGTGGGAGAGCTCACCAGCTTTC------CGTGACCGGTTTTCTGCCAATTTGGACAAAGTCAAAAAAGTGGTCCCTTTGAGAATTAATGAAACCCGTCTGTCTGACTCAGCCATCTATTACTGCGCTCTGAG-------CCCGTTGTCCCCG----------------------------GGAGTAGCTGATCAGCTTATCTTTGGAGAGGGGACAAAGTTGACCG…
aV3.1m_T09_062612	GATCCAGTTTCCCAGAGCCCACCTCAGTTACCGGTTGAGGAA---GGACAAACGGTAATGTTGAACTGTAGTTACAAA---TCGTTGGTT------GCTACTGCTCTCTTCTGGTACGTCCAACATCCTGGGGAAGCTCTGAGATATTTACTGAGGGCGTACAAGGATGAAGAGTGGGAGAGCTCACCAGCTTTC------CGTGACCGGTTTTCTGCCAATTTGGACAAAGTCAAAAAAGTGGTCCCTTTGAGAATTAATGAAACCCGTCTGTCTGACTCAGCCATCTATTACTGCGCTCTGAG-------CCCGTTGTCCCCG----------------------------GGAGTAGCTGATCAGCTTATCTTTGGAGAGGGGACAAAGTTGACCG…
aV3.1m_T24_071712	GATCCAGTTTCCCAGAGCCCACCTCAGTTACCGGTTGAGGAA---GGACAAACGGTAATGTTGAACTGTAGTTACAAA---TCGTTGGTT------GCTACTGCTCTCTTCTGGTACGTCCAACATCCTGGGGAAGCTCTGAGATATTTACTGAGGGCGTACAAGGATGAAGAGTGGGAGAGCTCACCAGCTTTC------CGTGACCGGTTTTCTGCCAATTTGGACAAAGTCAAAAAAGTGGTCCCTTTGAGAATTAATGAAACCCGTCTGTCTGACTCAGCCATCTATTACTGCGCTCTGAG-------CCCGTTGTCCCCG----------------------------GGAGTAGCTGATCAGCTTATCTTTGGAGAGGGGACAAAGTTGACCG…
aV3.1m_T17_062612	GATCCAGTTTCCCAGAGCCCACCTCAGTTACCGGTTGAGGAA---GGACAAACGGTAATGTTGAACTGTAGTTACAAA---TCGTTGGTT------GCTACTGCTCTCTTCTGGTACGTCCAACATCCTGGGGAAGCTCTGAGATATTTACTGAGGGCGTACAAGGATGAAGAGTGGGAGAGCTCACCAGCTTTC------CGTGACCGGTTTTCTGCCAATTTGGACAAAGTCAAAAAAGTGGTCCCTTTGAGAATTAATGAAACCCGTCTGTCTGACTCAGCCATCTATTACTGCGCTCTGAG-------CCCGTTGTCCCCG----------------------------GGAGTAGCTGATCAGCTTATCTTTGGAGAGGGGACAAAGTTGACCG…
aV3.1m_T02_061812	GATCCAGTTTCCCAGAGCCCACCTCAGTTACCGGTTGAGGAA---GGACAAACGGTAATGTTGAACTGTAGTTACAAA---TCGTTGGTT------GCTACTGCTCTCTTCTGGTACGTCCAACATCCTGGGGAAGCTCTGAGATATTTACTGAGGGCGTACAAGGATGAAGAGTGGGAGAGCTCACCAGCTTTC------CGTGACCGGTTTTCTGCCAATTTGGACAAAGTCAAAAAAGTGGTCCCTTTGAGAATTAATGAAACCCGTCTGTCTGACTCAGCCATCTATTACTGCGCTCTGAG-------CCCGTTGTCCCCG----------------------------GGAGTAGCTGATCAGCTTATCTTTGGAGAGGGGACAAAGTTGACCG…
aV3.1m_T22A_060712	GATCCAGTTTCCCAGAGCCCACCTCAGTTACCGGTTGAGGAA---GGACAAACGGTAATGTTGAACTGTAGTTACAAA---TCGTTGGTT------GCTACTGCTCTCTTCTGGTACGTCCAACATCCTGGGGAAGCTCTGAGATATTTACTGAGGGCGTACAAGGATGAAGAGTGGGAGAGCTCACCAGCTTTC------CGTGACCGGTTTTCTGCCAATTTGGACAAAGTCAAAAAAGTGGTCCCTTTGAGAATTAATGAAACCCGTCTGTCTGACTCAGCCATCTATTACTGCGCTCTGAG-------CCCGTTGTCCCCG----------------------------GGAGTAGCTGATCAGCTTATCTTTGGAGAGGGGACAAAGTTGACCG…
aV3.1m_T19_062612	GATCCAGTTTCCCAGAGCCCACCTCAGTTACCGGTTGAGGAA---GGACAAACGGTAATGTTGAACTGTAGTTACAAA---TCGTTGGTT------GCTACTGCTCTCTTCTGGTACGTCCAACATCCTGGGGAAGCTCTGAGATATTTACTGAGGGCGTACAAGGATGAAGAGTGGGAGAGCTCACCAGCTTTC------CGTGACCGGTTTTCTGCCAATTTGGACAAAGTCAAAAAAGTGGTCCCTTTGAGAATTAATGAAACCCGTCTGTCTGACTCAGCCATCTATTACTGCGCTCTGAG-------CCCGTTGTCCCCG----------------------------GGAGTAGCTGATCAGCTTATCTTTGGAGAGGGGACAAAGTTGACCG…
aV3.1m_T06_060612	GATCCAGTTTCCCAGAGCCCACCTCAGTTACCGGTTGAGGAA---GGACAAACGGTAATGTTGAACTGTAGTTACAAA---TCGTTGGTT------GCTACTGCTCTCTTCTGGTACGTCCAACATCCTGGGGAAGCTCTGAGATATTTACTGAGGGCGTACAAGGATGAAGAGTGGGAGAGCTCACCAGCTTTC------CGTGACCGGTTTTCTGCCAATTTGGACAAAGTCAAAAAAGTGGTCCCTTTGAGAATTAATGAAACCCGTCTGTCTGACTCAGCCATCTATTACTGCGCTCTGAG-------CCCGTTGTCCCCG----------------------------GGAGTAGCTGATCAGCTTATCTTTGGAGAGGGGACAAAGTTGACCG…
aV3.1m_T13_062012	GATCCAGTTTCCCAGAGCCCACCTCAGTTACCGGTTGAGGAA---GGACAAACGGTAATGTTGAACTGTAGTTACAAA---TCGTTGGTT------GCTACTGCTCTCTTCTGGTACGTCCAACATCCTGGGGAAGCTCTGAGATATTTACTGAGGGCGTACAAGGATGAAGAGTGGGAGAGCTCACCAGCTTTC------CGTGACCGGTTTTCTGCCAATTTGGACAAAGTCAAAAAAGTGGTCCCTTTGAGAATTAATGAAACCCGTCTGTCTGACTCAGCCATCTATTACTGCGCTCTGAG-------CCCGTTGTCCCCG----------------------------GGAGTAGCTGATCAGCTTATCTTTGGAGAGGGGACAAAGTTGACCG…
aV3.1m_T15_062612	GATCCAGTTTCCCAGAGCCCACCTCAGTTACCGGTTGAGGAA---GGACAAACGGTAATGTTGAACTGTAGTTACAAA---TCGTTGGTT------GCTACTGCTCTCTTCTGGTACGTCCAACATCCTGGGGAAGCTCTGAGATATTTACTGAGGGCGTACAAGGATGAAGAGTGGGAGAGCTCACCAGCTTTC------CGTGACCGGTTTTCTGCCAATTTGGACAAAGTCAAAAAAGTGGTCCCTTTGAGAATTAATGAAACCCGTCTGTCTGACTCAGCCATCTATTACTGCGCTCTGAG-------CCCGTTGTCCCCG----------------------------GGAGTAGCTGATCAGCTTATCTTTGGAGAGGGGACAAAGTTGACCG…
aV3.1m_T13_052410	GATCCAGTTTCCCAGAGCCCACCTCAGTTACCGGTTGAGGAA---GGACAAACGGTAATGTTGAACTGTAGTTACAAA---TCGTTGGTT------GCTACTGCTCTCTTCTGGTACGTCCAACATCCTGGGGAAGCTCTGAGATATTTACTGAGGGCGTACAAGGATGAAGAGTGGGAGAGCTCACCAGCTTTC------CGTGACCGGTTTTCTGCCAATTTGGACAAAGTCAAAAAAGTGGTCCCTTTGAGAATTAATGAAACCCGTCTGTCTGACTCAGCCATCTATTACTGCGCTCTGAG-------CCCGTTGTCCCCG----------------------------GGAGTAGCTGATCAGCTTATCTTTGGAGAGGGGACAAAGTTGACCG…
aV3.1m_T06_071712	GATCCAGTTTCCCAGAGCCCACCTCAGTTACCGGTTGAGGAA---GGACAAACGGTAATGTTGAACTGTAGTTACAAA---TCGTTGGTT------GCTACTGCTCTCTTCTGGTACGTCCAACATCCTGGGGAAGCTCTGAGATATTTACTGAGGGCGTACAAGGATGAAGAGTGGGAGAGCTCACCAGCTTTC------CGTGACCGGTTTTCTGCCAATTTGGACAAAGTCAAAAAAGTGGTCCCTTTGAGAATTAATGAAACCCGTCTGTCTGACTCAGCCATCTATTACTGCGCTCTGAG-------CCCGTTGTCCCCG----------------------------GGAGTAGCTGATCAGCTTATCTTTGGAGAGGGGACAAAGTTGACCG…
aV3.1m_T18_071712	GATCCAGTTTCCCAGAGCCCACCTCAGTTACCGGTTGAGGAA---GGACAAACGGTAATGTTGAACTGTAGTTACAAA---TCGTTGGTT------GCTACTGCTCTCTTCTGGTACGTCCAACATCCTGGGGAAGCTCTGAGATATTTACTGAGGGCGTACAAGGATGAAGAGTGGGAGAGCTCACCAGCTTTC------CGTGACCGGTTTTCTGCCAATTTGGACAAAGTCAAAAAAGTGGTCCCTTTGAGAATTAATGAAACCCGTCTGTCTGACTCAGCCATCTATTACTGCGCTCTGAG-------CCCGTTGTCCCCG----------------------------GGAGTAGCTGATCAGCTTATCTTTGGAGAGGGGACAAAGTTGACCG…
aV3.1m_T03_062512	GATCCAGTTTCCCAGAGCCCACCTCAGTTACCGGTTGAGGAA---GGACAAACGGTAATGTTGAACTGTAGTTACAAA---TCGTTGGTT------GCTACTGCTCTCTTCTGGTACGTCCAACATCCTGGGGAAGCTCTGAGATATTTACTGAGGGCGTACAAGGATGAAGAGTGGGAGAGCTCACCAGCTTTC------CGTGACCGGTTTTCTGCCAATTTGGACAAAGTCAAAAAAGTGGTCCCTTTGAGAATTAATGAAACCCGTCTGTCTGACTCAGCCATCTATTACTGCGCTCTGAG-------CCCGTTGTCCCCG----------------------------GGAGTAGCTGATCAGCTTATCTTTGGAGAGGGGACAAAGTTGACCG…
aV3.1m_T01_062012	GATCCAGTTTCCCAGAGCCCACCTCAGTTACCGGTTGAGGAA---GGACAAACGGTAATGTTGAACTGTAGTTACAAA---TCGTTGGTT------GCTACTGCTCTCTTCTGGTACGTCCAACATCCTGGGGAAGCTCTGAGATATTTACTGAGGGCGTACAAGGATGAAGAGTGGGAGAGCTCACCAGCTTTC------CGTGACCGGTTTTCTGCCAATTTGGACAAAGTCAAAAAAGTGGTCCCTTTGAGAATTAATGAAACCCGTCTGTCTGACTCAGCCATCTATTACTGCGCTCTGAG-------CCCGTTGTCCCCG----------------------------GGAGTAGCTGATCAGCTTATCTTTGGAGAGGGGACAAAGTTGACCG…
aV3.1m_T22_062612	GATCCAGTTTCCCAGAGCCCACCTCAGTTACCGGTTGAGGAA---GGACAAACGGTAATGTTGAACTGTAGTTACAAA---TCGTTGGTT------GCTACTGCTCTCTTCTGGTACGTCCAACATCCTGGGGAAGCTCTGAGATATTTACTGAGGGCGTACAAGGATGAAGAGTGGGAGAGCTCACCAGCTTTC------CGTGACCGGTTTTCTGCCAATTTGGACAAAGTCAAAAAAGTGGTCCCTTTGAGAATTAATGAAACCCGTCTGTCTGACTCAGCCATCTATTACTGCGCTCTGAG-------CCCGTTGTCCCCG----------------------------GGAGTAGCTGATCAGCTTATCTTTGGAGAGGGGACAAAGTTGACCG…
aV3.1m_T12_062612	GATCCAGTTTCCCAGAGCCCACCTCAGTTACCGGTTGAGGAA---GGACAAACGGTAATGTTGAACTGTAGTTACAAA---TCGTTGGTT------GCTACTGCTCTCTTCTGGTACGTCCAACATCCTGGGGAAGCTCTGAGATATTTACTGAGGGCGTACAAGGATGAAGAGTGGGAGAGCTCACCAGCTTTC------CGTGACCGGTTTTCTGCCAATTTGGACAAAGTCAAAAAAGTGGTCCCTTTGAGAATTAATGAAACCCGTCTGTCTGACTCAGCCATCTATTACTGCGCTCTGAG-------CCCGTTGTCCCCG----------------------------GGAGTAGCTGATCAGCTTATCTTTGGAGAGGGGACAAAGTTGACCG…
aV3.1m_T15_060512	GATCCAGTTTCCCAGAGCCCACCTCAGTTACCGGTTGAGGAA---GGACAAACGGTAATGTTGAACTGTAGTTACAAA---TCGTTGGTT------GCTACTGCTCTCTTCTGGTACGTCCAACATCCTGGGGAAGCTCTGAGATATTTACTGAGGGCGTACAAGGATGAAGAGTGGGAGAGCTCACCAGCTTTC------CGTGACCGGTTTTCTGCCAATTTGGACAAAGTCAAAAAAGTGGTCCCTTTGAGAATTAATGAAACCCGTCTGTCTGACTCAGCCATCTATTACTGCGCTCTGAG-------CCCGTTGTCCCCG----------------------------GGAGTAGCTGATCAGCTTATCTTTGGAGAGGGGACAAAGTTGACCG…
aV3.1m_T03_060512	GATCCAGTTTCCCAGAGCCCACCTCAGTTACCGGTTGAGGAA---GGACAAACGGTAATGTTGAACTGTAGTTACAAA---TCGTTGGTT------GCTACTGCTCTCTTCTGGTACGTCCAACATCCTGGGGAAGCTCTGAGATATTTACTGAGGGCGTACAAGGATGAAGAGTGGGAGAGCTCACCAGCTTTC------CGTGACCGGTTTTCTGCCAATTTGGACAAAGTCAAAAAAGTGGTCCCTTTGAGAATTAATGAAACCCGTCTGTCTGACTCAGCCATCTATTACTGCGCTCTGAG-------CCCGTTGTCCCCG----------------------------GGAGTAGCTGATCAGCTTATCTTTGGAGAGGGGACAAAGTTGACCG…
aV3.1m_T14_061812	GATCCAGTTTCCCAGAGCCCACCTCAGTTACCGGTTGAGGAA---GGACAAACGGTAATGTTGAACTGTAGTTACAAA---TCGTTGGTT------GCTACTGCTCTCTTCTGGTACGTCCAACATCCTGGGGAAGCTCTGAGATATTTACTGAGGGCGTACAAGGATGAAGAGTGGGAGAGCTCACCAGCTTTC------CGTGACCGGTTTTCTGCCAATTTGGACAAAGTCAAAAAAGTGGTCCCTTTGAGAATTAATGAAACCCGTCTGTCTGACTCAGCCATCTATTACTGCGCTCTGAG-------CCCGTTGTCCCCG----------------------------GGAGTAGCTGATCAGCTTATCTTTGGAGAGGGGACAAAGTTGACCG…
aV3.1m_T21A_060712	GATCCAGTTTCCCAGAGCCCACCTCAGTTACCGGTTGAGGAA---GGACAAACGGTAATGTTGAACTGTAGTTACAAA---TCGTTGGTT------GCTACTGCTCTCTTCTGGTACGTCCAACATCCTGGGGAAGCTCTGAGATATTTACTGAGGGCGTACAAGGATGAAGAGTGGGAGAGCTCACCAGCTTTC------CGTGACCGGTTTTCTGCCAATTTGGACAAAGTCAAAAAAGTGGTCCCTTTGAGAATTAATGAAACCCGTCTGTCTGACTCAGCCATCTATTACTGCGCTCTGAG-------CCCGTTGTCCCCG----------------------------GGAGTAGCTGATCAGCTTATCTTTGGAGAGGGGACAAAGTTGACCG…
aV3.1m_T19_071712	GATCCAGTTTCCCAGAGCCCACCTCAGTTACCGGTTGAGGAA---GGACAAACGGTAATGTTGAACTGTAGTTACAAA---TCGTTGGTT------GCTACTGCTCTCTTCTGGTACGTCCAACATCCTGGGGAAGCTCTGAGATATTTACTGAGGGCGTACAAGGATGAAGAGTGGGAGAGCTCACCAGCTTTC------CGTGACCGGTTTTCTGCCAATTTGGACAAAGTCAAAAAAGTGGTCCCTTTGAGAATTAATGAAACCCGTCTGTCTGACTCAGCCATCTATTACTGCGCTCTGAG-------CCCGTTGTCCCCG----------------------------GGAGTAGCTGATCAGCTTATCTTTGGAGAGGGGACAAAGTTGACCG…
aV3.1m_T07_071712	GATCCAGTTTCCCAGAGCCCACCTCAGTTACCGGTTGAGGAA---GGACAAACGGTAATGTTGAACTGTAGTTACAAA---TCGTTGGTT------GCTACTGCTCTCTTCTGGTACGTCCAACATCCTGGGGAAGCTCTGAGATATTTACTGAGGGCGTACAAGGATGAAGAGTGGGAGAGCTCACCAGCTTTC------CGTGACCGGTTTTCTGCCAATTTGGACAAAGTCAAAAAAGTGGTCCCTTTGAGAATTAATGAAACCCGTCTGTCTGACTCAGCCATCTATTACTGCGCTCTGAG-------CCCGTTGTCCCCG----------------------------GGAGTAGCTGATCAGCTTATCTTTGGAGAGGGGACAAAGTTGACCG…
aV3.1m_T09_060612	GATCCAGTTTCCCAGAGCCCACCTCAGTTACCGGTTGAGGAA---GGACAAACGGTAATGTTGAACTGTAGTTACAAA---TCGTTGGTT------GCTACTGCTCTCTTCTGGTACGTCCAACATCCTGGGGAAGCTCTGAGATATTTACTGAGGGCGTACAAGGATGAAGAGTGGGAGAGCTCACCAGCTTTC------CGTGACCGGTTTTCTGCCAATTTGGACAAAGTCAAAAAAGTGGTCCCTTTGAGAATTAATGAAACCCGTCTGTCTGACTCAGCCATCTATTACTGCGCTCTGAG-------CCCGTTGTCCCCG----------------------------GGAGTAGCTGATCAGCTTATCTTTGGAGAGGGGACAAAGTTGACCG…
aV3.1m_T10_061812	GATCCAGTTTCCCAGAGCCCACCTCAGTTACCGGTTGAGGAA---GGACAAACGGTAATGTTGAACTGTAGTTACAAA---TCGTTGGTT------GCTACTGCTCTCTTCTGGTACGTCCAACATCCTGGGGAAGCTCTGAGATATTTACTGAGGGCGTACAAGGATGAAGAGTGGGAGAGCTCACCAGCTTTC------CGTGACCGGTTTTCTGCCAATTTGGACAAAGTCAAAAAAGTGGTCCCTTTGAGAATTAATGAAACCCGTCTGTCTGACTCAGCCATCTATTACTGCGCTCTGAG-------CCCGTTGTCCCCG----------------------------GGAGTAGCTGATCAGCTTATCTTTGGAGAGGGGACAAAGTTGACCG…
aV3.1m_T23_062612	GATCCAGTTTCCCAGAGCCCACCTCAGTTACCGGTTGAGGAA---GGACAAACGGTAATGTTGAACTGTAGTTACAAA---TCGTTGGTT------GCTACTGCTCTCTTCTGGTACGTCCAACATCCTGGGGAAGCTCTGAGATATTTACTGAGGGCGTACAAGGATGAAGAGTGGGAGAGCTCACCAGCTTTC------CGTGACCGGTTTTCTGCCAATTTGGACAAAGTCAAAAAAGTGGTCCCTTTGAGAATTAATGAAACCCGTCTGTCTGACTCAGCCATCTATTACTGCGCTCTGAG-------CCCGTTGTCCCCG----------------------------GGAGTAGCTGATCAGCTTATCTTTGGAGAGGGGACAAAGTTGACCG…
aV3.1m_T07_052410	GATCCAGTTTCCCAGAGCCCACCTCAGTTACCGGTTGAGGAA---GGACAAACGGTAATGTTGAACTGTAGTTACAAA---TCGTTGGTT------GCTACTGCTCTCTTCTGGTACGTCCAACATCCTGGGGAAGCTCTGAGATATTTACTGAGGGCGTACAAGGATGAAGAGTGGGAGAGCTCACCAGCTTTC------CGTGACCGGTTTTCTGCCAATTTGGACAAAGTCAAAAAAGTGGTCCCTTTGAGAATTAATGAAACCCGTCTGTCTGACTCAGCCATCTATTACTGCGCTCTGAG-------CCCGTTGTCCCCG----------------------------GGAGTAGCTGATCAGCTTATCTTTGGAGAGGGGACAAAGTTGACCG…
aV3.1m_T23_062012	GATCCAGTTTCCCAGAGCCCACCTCAGTTACCGGTTGAGGAA---GGACAAACGGTAATGTTGAACTGTAGTTACAAA---TCGTTGGTT------GCTACTGCTCTCTTCTGGTACGTCCAACATCCTGGGGAAGCTCTGAGATATTTACTGAGGGCGTACAAGGATGAAGAGTGGGAGAGCTCACCAGCTTTC------CGTGACCGGTTTTCTGCCAATTTGGACAAAGTCAAAAAAGTGGTCCCTTTGAGAATTAATGAAACCCGTCTGTCTGACTCAGCCATCTATTACTGCGCTCTGAG-------CCCGTTGTCCCCG----------------------------GGAGTAGCTGATCAGCTTATCTTTGGAGAGGGGACAAAGTTGACCG…
aV3.1m_T16_052410	GATCCAGTTTCCCAGAGCCCACCTCAGTTACCGGTTGAGGAA---GGACAAACGGTAATGTTGAACTGTAGTTACAAA---TCGTTGGTT------GCTACTGCTCTCTTCTGGTACGTCCAACATCCTGGGGAAGCTCTGAGATATTTACTGAGGGCGTACAAGGATGAAGAGTGGGAGAGCTCACCAGCTTTC------CGTGACCGGTTTTCTGCCAATTTGGACAAAGTCAAAAAAGTGGTCCCTTTGAGAATTAATGAAACCCGTCTGTCTGACTCAGCCATCTATTACTGCGCTCTGAG-------CCCGTTGTCCCCG----------------------------GGAGTAGCTGATCAGCTTATCTTTGGAGAGGGGACAAAGTTGACCG…
aV3.1m_T22_062012	GATCCAGTTTCCCAGAGCCCACCTCAGTTACCGGTTGAGGAA---GGACAAACGGTAATGTTGAACTGTAGTTACAAA---TCGTTGGTT------GCTACTGCTCTCTTCTGGTACGTCCAACATCCTGGGGAAGCTCTGAGATATTTACTGAGGGCGTACAAGGATGAAGAGTGGGAGAGCTCACCAGCTTTC------CGTGACCGGTTTTCTGCCAATTTGGACAAAGTCAAAAAAGTGGTCCCTTTGAGAATTAATGAAACCCGTCTGTCTGACTCAGCCATCTATTACTGCGCTCTGAG-------CCCGTTGTCCCCG----------------------------GGAGTAGCTGATCAGCTTATCTTTGGAGAGGGGACAAAGTTGACCG…
aV3.1m_T11_062612	GATCCAGTTTCCCAGAGCCCACCTCAGTTACCGGTTGAGGAA---GGACAAACGGTAATGTTGAACTGTAGTTACAAA---TCGTTGGTT------GCTACTGCTCTCTTCTGGTACGTCCAACATCCTGGGGAAGCTCTGAGATATTTACTGAGGGCGTACAAGGATGAAGAGTGGGAGAGCTCACCAGCTTTC------CGTGACCGGTTTTCTGCCAATTTGGACAAAGTCAAAAAAGTGGTCCCTTTGAGAATTAATGAAACCCGTCTGTCTGACTCAGCCATCTATTACTGCGCTCTGAG-------CCCGTTGTCCCCG----------------------------GGAGTAGCTGATCAGCTTATCTTTGGAGAGGGGACAAAGTTGACCG…
aV3.1m_T03_052410	GATCCAGTTTCCCAGAGCCCACCTCAGTTACCGGTTGAGGAA---GGACAAACGGTAATGTTGAACTGTAGTTACAAA---TCGTTGGTT------GCTACTGCTCTCTTCTGGTACGTCCAACATCCTGGGGAAGCTCTGAGATATTTACTGAGGGCGTACAAGGATGAAGAGTGGGAGAGCTCACCAGCTTTC------CGTGACCGGTTTTCTGCCAATTTGGACAAAGTCAAAAAAGTGGTCCCTTTGAGAATTAATGAAACCCGTCTGTCTGACTCAGCCATCTATTACTGCGCTCTGAG-------CCCGTTGTCCCCG----------------------------GGAGTAGCTGATCAGCTTATCTTTGGAGAGGGGACAAAGTTGACCG…
aV3.1m_T17_052410	GANCCAGTTTCCCAGAGCCCACCTCAGTTACCGGTTGAGGAA---GGACAAACGGTAATGTTGAACTGTAGTTACAAA---TCGTTGGTT------GCTACTGCTCTCTTCTGGTACGTCCAACATCCTGGGGAAGCTCTGAGATATTTACTGAGGGCGTACAAGGATGAAGAGTGGGAGAGCTCACCAGCTTTC------CGTGACCGGTTTTCTGCCAATTTGGACAAAGTCAAAAAAGTGGTCCCTTTGAGAATTAATGAAACCCGTCTGTCTGACTCAGCCATCTATTACTGCGCTCTGAG-------CCCGTTGTCCCCG----------------------------GGAGTAGCTGATCAGCTTATCTTTGGAGAGGGGACAAAGTTGACCG…
aV3.1m_T21_062512	GATCCAGTTTCCCAGAGCCCACCTCAGTTACCGGTTGAGGAA---GGACAAACGGTAATGTTGAACTGTAGTTACAAA---TCGTTGGTT------GCTACTGCTCTCTTCTGGTACGTCCAACATCCTGGGGAAGCTCTGAGATATTTACTGAGGGCGTACAAGGATGAAGAGTGGGAGAGCTCACCAGCTTTC------CGTGACCGGTTTTCTGCCAATTTGGACAAAGTCAAAAAAGTGGTCCCTTTGAGAATTAATGAAACCCGTCTGTCTGACTCAGCCATCTATTACTGCGCTCTGAG-------CCCGTTGTCCCCG----------------------------GGAGTAGCTGATCAGCTTATCTTTGGAGAGGGGACAAAGTTGACCG…
aV3.1m_T15_062012	GATCCAGTTTCCCAGAGCCCACCTCAGTTACCGGTTGAGGAA---GGACAAACGGTAATGTTGAACTGTAGTTACAAA---TCGTTGGTT------GCTACTGCTCTCTTCTGGTACGTCCAACATCCTGGGGAAGCTCTGAGATATTTACTGAGGGCGTACAAGGATGAAGAGTGGGAGAGCTCACCAGCTTTC------CGTGACCGGTTTTCTGCCAATTTGGACAAAGTCAAAAAAGTGGTCCCTTTGAGAATTAATGAAACCCGTCTGTCTGACTCAGCCATCTATTACTGCGCTCTGAG-------CCCGTTGTCCCCG----------------------------GGAGTAGCTGATCAGCTTATCTTTGGAGAGGGGACAAAGTTGACCG…
aV3.1m_T16_071712	GATCCAGTTTCCCAGAGCCCACCTCAGTTACCGGTTGAGGAA---GGACAAACGGTAATGTTGAACTGTAGTTACAAA---TCGTTGGTT------GCTACTGCTCTCTTCTGGTACGTCCAACATCCTGGGGAAGCTCTGAGATATTTACTGAGGGCGTACAAGGATGAAGAGTGGGAGAGCTCACCAGCTTTC------CGTGACCGGTTTTCTGCCAATTTGGACAAAGTCAAAAAAGTGGTCCCTTTGAGAATTAATGAAACCCGTCTGTCTGACTCAGCCATCTATTACTGCGCTCTGAG-------CCCGTTGTCCCCG----------------------------GGAGTAGCTGATCAGCTTATCTTTGGAGAGGGGACAAAGTTGACCG…
aV3.1m_T22B_060712	GATCCAGTTTCCCAGAGCCCACCTCAGTTACCGGTTGAGGAA---GGACAAACGGTAATGTTGAACTGTAGTTACAAA---TCGTTGGTT------GCTACTGCTCTCTTCTGGTACGTCCAACATCCTGGGGAAGCTCTGAGATATTTACTGAGGGCGTACAAGGATGAAGAGTGGGAGAGCTCACCAGCTTTC------CGTGACCGGTTTTCTGCCAATTTGGACAAAGTCAAAAAAGTGGTCCCTTTGAGAATTAATGAAACCCGTCTGTCTGACTCAGCCATCTATTACTGCGCTCTGAG-------CCCGTTGTCCCCG----------------------------GGAGTAGCTGATCAGCTTATCTTTGGAGAGGGGACAAAGTTGACCG…
aV3.1m_T01_062512	GATCCAGTTTCCCAGAGCCCACCTCAGTTACCGGTTGAGGAA---GGACAAACGGTAATGTTGAACTGTAGTTACAAA---TCGTTGGTT------GCTACTGCTCTCTTCTGGTACGTCCAACATCCTGGGGAAGCTCTGAGATATTTACTGAGGGCGTACAAGGATGAAGAGTGGGAGAGCTCACCAGCTTTC------CGTGACCGGTTTTCTGCCAATTTGGACAAAGTCAAAAAAGTGGTCCCTTTGAGAATTAATGAAACCCGTCTGTCTGACTCAGCCATCTATTACTGCGCTCTGAG-------CCCGTTGTCCCCG----------------------------GGAGTAGCTGATCAGCTTATCTTTGGAGAGGGGACAAAGTTGACCG…
aV3.1m_T05_062612	GATCCAGTTTCCCAGAGCCCACCTCAGTTACCGGTTGAGGAA---GGACAAACGGTAATGTTGAACTGTAGTTACAAA---TCGTTGGTT------GCTACTGCTCTCTTCTGGTACGTCCAACATCCTGGGGAAGCTCTGAGATATTTACTGAGGGCGTACAAGGATGAAGAGTGGGAGAGCTCACCAGCTTTC------CGTGACCGGTTTTCTGCCAATTTGGACAAAGTCAAAAAAGTGGTCCCTTTGAGAATTAATGAAACCCGTCTGTCTGACTCAGCCATCTATTACTGCGCTCTGAG-------CCCGTTGTCCCCG----------------------------GGAGTAGCTGATCAGCTTATCTTTGGAGAGGGGACAAAGTTGACCG…
aV3.1m_T18_062612	GATCCAGTTTCCCAGAGCCCACCTCAGTTACCGGTTGAGGAA---GGACAAACGGTAATGTTGAACTGTAGTTACAAA---TCGTTGGTT------GCTACTGCTCTCTTCTGGTACGTCCAACATCCTGGGGAAGCTCTGAGATATTTACTGAGGGCGTACAAGGATGAAGAGTGGGAGAGCTCACCAGCTTTC------CGTGACCGGTTTTCTGCCAATTTGGACAAAGTCAAAAAAGTGGTCCCTTTGAGAATTAATGAAACCCGTCTGTCTGACTCAGCCATCTATTACTGCGCTCTGAG-------CCCGTTGTCCCCG----------------------------GGAGTAGCTGATCAGCTTATCTTTGGAGAGGGGACAAAGTTGACCG…
aV3.1m_T08_061812	GATCCAGTTTCCCAGAGCCCACCTCAGTTACCGGTTGAGGAA---GGACAAACGGTAATGTTGAACTGTAGTTACAAA---TCGTTGGTT------GCTACTGCTCTCTTCTGGTACGTCCAACATCCTGGGGAAGCTCTGAGATATTTACTGAGGGCGTACAAGGATGAAGAGTGGGAGAGCTCACCAGCTTTC------CGTGACCGGTTTTCTGCCAATTTGGACAAAGTCAAAAAAGTGGTCCCTTTGAGAATTAATGAAACCCGTCTGTCTGACTCAGCCATCTATTACTGCGCTCTGAG-------CCCGTTGTCCCCG----------------------------GGAGTAGCTGATCAGCTTATCTTTGGAGAGGGGACAAAGTTGACCG…
aV3.1m_T24A_060712	GATCCAGTTTCCCAGAGCCCACCTCAGTTACCGGTTGAGGAA---GGACAAACGGTAATGTTGAACTGTAGTTACAAA---TCGTTGGTT------GCTACTGCTCTCTTCTGGTACGTCCAACATCCTGGGGAAGCTCTGAGATATTTACTGAGGGCGTACAAGGATGAAGAGTGGGAGAGCTCACCAGCTTTC------CGTGACCGGTTTTCTGCCAATTTGGACAAAGTCAAAAAAGTGGTCCCTTTGAGAATTAATGAAACCCGTCTGTCTGACTCAGCCATCTATTACTGCGCTCTGAG-------CCCGTTGTCCCCG----------------------------GGAGTAGCTGATCAGCTTATCTTTGGAGAGGGGACAAAGTTGACCG…
aV3.1m_T11_052410	GATCCAGTTTCCCAGAGCCCACCTCAGTTACCGGTTGAGGAA---GGACAAACGGTAATGTTGAACTGTAGTTACAAA---TCGTTGGTT------GCTACTGCTCTCTTCTGGTACGTCCAACATCCTGGGGAAGCTCTGAGATATTTACTGAGGGCGTACAAGGATGAAGAGTGGGAGAGCTCACCAGCTTTC------CGTGACCGGTTTTCTGCCAATTTGGACAAAGTCAAAAAAGTGGTCCCTTTGAGAATTAATGAAACCCGTCTGTCTGACTCAGCCATCTATTACTGCGCTCTGAG-------CCCGTTGTCCCCG----------------------------GGAGTAGCTGATCAGCTTATCTTTGGAGAGGGGACAAAGTTGACCG…
aV3.1m_T27_052410	GATCCAGTTTCCCAGAGCCCACCTCAGTTACCGGTTGAGGAA---GGACAAACGGTAATGTTGAACTGTAGTTACAAA---TCGTTGGTT------GCTACTGCTCTCTTCTGGTACGTCCAACATCCTGGGGAAGCTCTGAGATATTTACTGAGGGCGTACAAGGATGAAGAGTGGGAGAGCTCACCAGCTTTC------CGTGACCGGTTTTCTGCCAATTTGGACAAAGTCAAAAAAGTGGTCCCTTTGAGAATTAATGAAACCCGTCTGTCTGACTCAGCCATCTATTACTGCGCTCTGAG-------CCCGTTGTCCCCG----------------------------GGAGTAGCTGATCAGCTTATCTTTGGAGAGGGGACAAAGTTGACCG…
aV3.1m_T04_070912	GATCCAGTTTCCCAGAGCCCACCTCAGTTACCGGTTGAGGAA---GGACAAACGGTAATGTTGAACTGTAGTTACAAA---TCGTTGGTT------GCTACTGCTCTCTTCTGGTACGTCCAACATCCTGGGGAAGCTCTGAGATATTTACTGAGGGCGTACAAGGATGAAGAGTGGGAGAGCTCACCAGCTTTC------CGTGACCGGTTTTCTGCCAATTTGGACAAAGTCAAAAAAGTGGTCCCTTTGAGAATTAATGAAACCCGTCTGTCTGACTCAGCCATCTATTACTGCGCTCTGAG-------CCCGTTGTCCCCG----------------------------GGAGTAGCTGATCAGCTTATCTTTGGAGAGGGGACAAAGTTGACCG…
aV3.1m_T08_070912	GATCCAGTTTCCCAGAGCCCACCTCAGTTACCGGTTGAGGAA---GGACAAACGGTAATGTTGAACTGTAGTTACAAA---TCGTTGGTT------GCTACTGCTCTCTTCTGGTACGTCCAACATCCTGGGGAAGCTCTGAGATATTTACTGAGGGCGTACAAGGATGAAGAGTGGGAGAGCTCACCAGCTTTC------CGTGACCGGTTTTCTGCCAATTTGGACAAAGTCAAAAAAGTGGTCCCTTTGAGAATTAATGAAACCCGTCTGTCTGACTCAGCCATCTATTACTGCGCTCTGAG-------CCCGTTGTCCCCG----------------------------GGAGTAGCTGATCAGCTTATCTTTGGAGAGGGGACAAAGTTGACCG…
aV3.1m_T16_062012	GATCCAGTTTCCCAGAGCCCACCTCAGTTACCGGTTGAGGAA---GGACAAACGGTAATGTTGAACTGTAGTTACAAA---TCGTTGGTT------GCTACTGCTCTCTTCTGGTACGTCCAACATCCTGGGGAAGCTCTGAGATATTTACTGAGGGCGTACAAGGATGAAGAGTGGGAGAGCTCACCAGCTTTC------CGTGACCGGTTTTCTGCCAATTTGGACAAAGTCAAAAAAGTGGTCCCTTTGAGAATTAATGAAACCCGTCTGTCTGACTCAGCCATCTATTACTGCGCTCTGAG-------CCCGTTGTCCCCG----------------------------GGAGTAGCTGATCAGCTTATCTTTGGAGAGGGGACAAAGTTGACCG…
aV3.1m_T05_052410	GATCCAGTTTCCCAGAGCCCACCTCAGTTACCGGTTGAGGAA---GGACAAACGGTAATGTTGAACTGTAGTTACAAA---TCGTTGGTT------GCTACTGCTCTCTTCTGGTACGTCCAACATCCTGGGGAAGCTCTGAGATATTTACTGAGGGCGTACAAGGATGAAGAGTGGGAGAGCTCACCAGCTTTC------CGTGACCGGTTTTCTGCCAATTTGGACAAAGTCAAAAAAGTGGTCCCTTTGAGAATTAATGAAACCCGTCTGTCTGACTCAGCCATCTATTACTGCGCTCTGAG-------CCCGTTGTCCCCG----------------------------GGAGTAGCTGATCAGCTTATCTTTGGAGAGGGGACAAAGTTGACCG…
aV3.1m_T01_061812	GATCCAGTTTCCCAGAGCCCACCTCAGTTACCGGTTGAGGAA---GGACAAACGGTAATGTTGAACTGTAGTTACAAA---TCGTTGGTT------GCTACTGCTCTCTTCTGGTACGTCCAACATCCTGGGGAAGCTCTGAGATATTTACTGAGGGCGTACAAGGATGAAGAGTGGGAGAGCTCACCAGCTTTC------CGTGACCGGTTTTCTGCCAATTTGGACAAAGTCAAAAAAGTGGTCCCTTTGAGAATTAATGAAACCCGTCTGTCTGACTCAGCCATCTATTACTGCGCTCTGAG-------CCCGTTGTCCCCG----------------------------GGAGTAGCTGATCAGCTTATCTTTGGAGAGGGGACAAAGTTGACCG…
aV3.1m_T23B_060712	GATCCAGTTTCCCAGAGCCCACCTCAGTTACCGGTTGAGGAA---GGACAAACGGTAATGTTGAACTGTAGTTACAAA---TCGTTGGTT------GCTACTGCTCTCTTCTGGTACGTCCAACATCCTGGGGAAGCTCTGAGATATTTACTGAGGGCGTACAAGGATGAAGAGTGGGAGAGCTCACCAGCTTTC------CGTGACCGGTTTTCTGCCAATTTGGACAAAGTCAAAAAAGTGGTCCCTTTGAGAATTAATGAAACCCGTCTGTCTGACTCAGCCATCTATTACTGCGCTCTGAG-------CCCGTTGTCCCCG----------------------------GGAGTAGCTGATCAGCTTATCTTTGGAGAGGGGACAAAGTTGACCG…
aV3.1m_T10_062612	GATCCAGTTTCCCAGAGCCCACCTCAGTTACCGGTTGAGGAA---GGACAAACGGTAATGTTGAACTGTAGTTACAAA---TCGTTGGTT------GCTACTGCTCTCTTCTGGTACGTCCAACATCCTGGGGAAGCTCTGAGATATTTACTGAGGGCGTACAAGGATGAAGAGTGGGAGAGCTCACCAGCTTTC------CGTGACCGGTTTTCTGCCAATTTGGACAAAGTCAAAAAAGTGGTCCCTTTGAGAATTAATGAAACCCGTCTGTCTGACTCAGCCATCTATTACTGCGCTCTGAG-------CCCGTTGTCCCCG----------------------------GGAGTAGCTGATCAGCTTATCTTTGGAGAGGGGACAAAGTTGACCG…
aV3.1m_T21_060512	GATCCAGTTTCCCAGAGCCCACCTCAGTTACCGGTTGAGGAA---GGACAAACGGTAATGTTGAACTGTAGTTACAAA---TCGTTGGTT------GCTACTGCTCTCTTCTGGTACGTCCAACATCCTGGGGAAGCTCTGAGATATTTACTGAGGGCGTACAAGGATGAAGAGTGGGAGAGCTCACCAGCTTTC------CGTGACCGGTTTTCTGCCAATTTGGACAAAGTCAAAAAAGTGGTCCCTTTGAGAATTAATGAAACCCGTCTGTCTGACTCAGCCATCTATTACTGCGCTCTGAG-------CCCGTTGTCCCCG----------------------------GGAGTAGCTGATCAGCTTATCTTTGGAGAGGGGACAAAGTTGACCG…
aV3.1m_T04_062012	GATCCAGTTTCCCAGAGCCCACCTCAGTTACCGGTTGAGGAA---GGACAAACGGTAATGTTGAACTGTAGTTACAAA---TCGTTGGTT------GCTACTGCTCTCTTCTGGTACGTCCAACATCCTGGGGAAGCTCTGAGATATTTACTGAGGGCGTACAAGGATGAAGAGTGGGAGAGCTCACCAGCTTTC------CGTGACCGGTTTTCTGCCAATTTGGACAAAGTCAAAAAAGTGGTCCCTTTGAGAATTAATGAAACCCGTCTGTCTGACTCAGCCATCTATTACTGCGCTCTGAG-------CCCGTTGTCCCCG----------------------------GGAGTAGCTGATCAGCTTATCTTTGGAGAGGGGACAAAGTTGACCG…
aV3.1m_T10_070912	GATCCAGTTTCCCAGAGCCCACCTCAGTTACCGGTTGAGGAA---GGACAAACGGTAATGTTGAACTGTAGTTACAAA---TCGTTGGTT------GCTACTGCTCTCTTCTGGTACGTCCAACATCCTGGGGAAGCTCTGAGATATTTACTGAGGGCGTACAAGGATGAAGAGTGGGAGAGCTCACCAGCTTTC------CGTGACCGGTTTTCTGCCAATTTGGACAAAGTCAAAAAAGTGGTCCCTTTGAGAATTAATGAAACCCGTCTGTCTGACTCAGCCATCTATTACTGCGCTCTGAG-------CCCGTTGTCCCCG----------------------------GGAGTAGCTGATCAGCTTATCTTTGGAGAGGGGACAAAGTTGACCG…
aV3.1m_T22_052410	GATCCAGTTTCCCAGAGCCCACCTCAGTTACCGGTTGAGGAA---GGACAAACGGTAATGTTGAACTGTAGTTACAAA---TCGTTGGTT------GCTACTGCTCTCTTCTGGTACGTCCAACATCCTGGGGAAGCTCTGAGATATTTACTGAGGGCGTACAAGGATGAAGAGTGGGAGAGCTCACCAGCTTTC------CGTGACCGGTTTTCTGCCAATTTGGACAAAGTCAAAAAAGTGGTCCCTTTGAGAATTAATGAAACCCGTCTGTCTGACTCAGCCATCTATTACTGCGCTCTGAG-------CCCGTTGTCCCCG----------------------------GGAGTAGCTGATCAGCTTATCTTTGGAGAGGGGACAAAGTTGACCG…
aV3.1m_T26_052410	GATCCAGTTTCCCAGAGCCCACCTCAGTTACCGGTTGAGGAA---GGACAAACGGTAATGTTGAACTGTAGTTACAAA---TCGTTGGTT------GCTACTGCTCTCTTCTGGTACGTCCAACATCCTGGGGAAGCTCTGAGATATTTACTGAGGGCGTACAAGGATGAAGAGTGGGAGAGCTCACCAGCTTTC------CGTGACCGGTTTTCTGCCAATTTGGACAAAGTCAAAAAAGTGGTCCCTTTGAGAATTAATGAAACCCGTCTGTCTGACTCAGCCATCTATTACTGCGCTCTGAG-------CCCGTTGTCCCCG----------------------------GGAGTAGCTGATCAGCTTATCTTTGGAGAGGGGACAAAGTTGACCG…
aV3.1m_T16_060612	GATCCAGTTTCCCAGAGCCCACCTCAGTTACCGGTTGAGGAA---GGACAAACGGTAATGTTGAACTGTAGTTACAAA---TCGTTGGTT------GCTACTGCTCTCTTCTGGTACGTCCAACATCCTGGGGAAGCTCTGAGATATTTACTGAGGGCGTACAAGGATGAAGAGTGGGAGAGCTCACCAGCTTTC------CGTGACCGGTTTTCTGCCAATTTGGACAAAGTCAAAAAAGTGGTCCCTTTGAGAATTAATGAAACCCGTCTGTCTGACTCAGCCATCTATTACTGCGCTCTGAG-------CCCGTTGTCCCCG----------------------------GGAGTAGCTGATCAGCTTATCTTTGGAGAGGGGACAAAGTTGACCG…
aV3.1m_T05_061812	GATCCAGTTTCCCAGAGCCCACCTCAGTTACCGGTTGAGGAA---GGACAAACGGTAATGTTGAACTGTAGTTACAAA---TCGTTGGTT------GCTACTGCTCTCTTCTGGTACGTCCAACATCCTGGGGAAGCTCTGAGATATTTACTGAGGGCGTACAAGGATGAAGAGTGGGAGAGCTCACCAGCTTTC------CGTGACCGGTTTTCTGCCAATTTGGACAAAGTCAAAAAAGTGGTCCCTTTGAGAATTAATGAAACCCGTCTGTCTGACTCAGCCATCTATTACTGCGCTCTGAG-------CCCGTTGTCCCCG----------------------------GGAGTAGCTGATCAGCTTATCTTTGGAGAGGGGACAAAGTTGACCG…
aV3.1m_T14_071712	GATCCAGTTTCCCAGAGCCCACCTCAGTTACCGGTTGAGGAA---GGACAAACGGTAATGTTGAACTGTAGTTACAAA---TCGTTGGTT------GCTACTGCTCTCTTCTGGTACGTCCAACATCCTGGGGAAGCTCTGAGATATTTACTGAGGGCGTACAAGGATGAAGAGTGGGAGAGCTCACCAGCTTTC------CGTGACCGGTTTTCTGCCAATTTGGACAAAGTCAAAAAAGTGGTCCCTTTGAGAATTAATGAAACCCGTCTGTCTGACTCAGCCATCTATTACTGCGCTCTGAG-------CCCGTTGTCCCCG----------------------------GGAGTAGCTGATCAGCTTATCTTTGGAGAGGGGACAAAGTTGACCG…
aV3.1m_T19_060512	GATCCAGTTTCCCAGAGCCCACCTCAGTTACCGGTTGAGGAA---GGACAAACGGTAATGTTGAACTGTAGTTACAAA---TCGTTGGTT------GCTACTGCTCTCTTCTGGTACGTCCAACATCCTGGGGAAGCTCTGAGATATTTACTGAGGGCGTACAAGGATGAAGAGTGGGAGAGCTCACCAGCTTTC------CGTGACCGGTTTTCTGCCAATTTGGACAAAGTCAAAAAAGTGGTCCCTTTGAGAATTAATGAAACCCGTCTGTCTGACTCAGCCATCTATTACTGCGCTCTGAG-------CCCGTTGTCCCCG----------------------------GGAGTAGCTGATCAGCTTATCTTTGGAGAGGGGACAAAGTTGACCG…
aV3.1m_T22_062512	GATCCAGTTTCCCAGAGCCCACCTCAGTTACCGGTTGAGGAA---GGACAAACGGTAATGTTGAACTGTAGTTACAAA---TCGTTGGTT------GCTACTGCTCTCTTCTGGTACGTCCAACATCCTGGGGAAGCTCTGAGATATTTACTGAGGGCGTACAAGGATGAAGAGTGGGAGAGCTCACCAGCTTTC------CGTGACCGGTTTTCTGCCAATTTGGACAAAGTCAAAAAAGTGGTCCCTTTGAGAATTAATGAAACCCGTCTGTCTGACTCAGCCATCTATTACTGCGCTCTGAG-------CCCGTTGTCCCCG----------------------------GGAGTAGCTGATCAGCTTATCTTTGGAGAGGGGACAAAGTTGACCG…
aV3.1m_T29_052410	GATCCAGTTTCCCAGAGCCCACCTCAGTTACCGGTTGAGGAA---GGACAAACGGTAATGTTGAACTGTAGTTACAAA---TCGTTGGTT------GCTACTGCTCTCTTCTGGTACGTCCAACATCCTGGGGAAGCTCTGAGATATTTACTGAGGGCGTACAAGGATGAAGAGTGGGAGAGCTCACCAGCTTTC------CGTGACCGGTTTTCTGCCAATTTGGACAAAGTCAAAAAAGTGGTCCCTTTGAGAATTAATGAAACCCGTCTGTCTGACTCAGCCATCTATTACTGCGCTCTGAG-------CCCGTTGTCCCCG----------------------------GGAGTAGCTGATCAGCTTATCTTTGGAGAGGGGACAAAGTTGACCG…
aV3.1m_T17_062012	GATCCAGTTTCCCAGAGCCCACCTCAGTTACCGGTTGAGGAA---GGACAAACGGTAATGTTGAACTGTAGTTACAAA---TCGTTGGTT------GCTACTGCTCTCTTCTGGTACGTCCAACATCCTGGGGAAGCTCTGAGATATTTACTGAGGGCGTACAAGGATGAAGAGTGGGAGAGCTCACCAGCTTTC------CGTGACCGGTTTTCTGCCAATTTGGACAAAGTCAAAAAAGTGGTCCCTTTGAGAATTAATGAAACCCGTCTGTCTGACTCAGCCATCTATTACTGCGCTCTGAG-------CCCGTTGTCCCCG----------------------------GGAGTAGCTGATCAGCTTATCTTTGGAGAGGGGACAAAGTTGACCG…
aV3.1m_T30_052410	GATCCAGTTTCCCAGAGCCCACCTCAGTTACCGGTTGAGGAA---GGACAAACGGTAATGTTGAACTGTAGTTACAAA---TCGTTGGTT------GCTACTGCTCTCTTCTGGTACGTCCAACATCCTGGGGAAGCTCTGAGATATTTACTGAGGGCGTACAAGGATGAAGAGTGGGAGAGCTCACCAGCTTTC------CGTGACCGGTTTTCTGCCAATTTGGACAAAGTCAAAAAAGTGGTCCCTTTGAGAATTAATGAAACCCGTCTGTCTGACTCAGCCATCTATTACTGCGCTCTGAG-------CCCGTTGTCCCCG----------------------------GGAGTAGCTGATCAGCTTATCTTTGGAGAGGGGACAAAGTTGACCG…
aV3.1m_T20_062612	GATCCAGTTTCCCAGAGCCCACCTCAGTTACCGGTTGAGGAA---GGACAAACGGTAATGTTGAACTGTAGTTACAAA---TCGTTGGTT------GCTACTGCTCTCTTCTGGTACGTCCAACATCCTGGGGAAGCTCTGAGATATTTACTGAGGGCGTACAAGGATGAAGAGTGGGAGAGCTCACCAGCTTTC------CGTGACCGGTTTTCTGCCAATTTGGACAAAGTCAAAAAAGTGGTCCCTTTGAGAATTAATGAAACCCGTCTGTCTGACTCAGCCATCTATTACTGCGCTCTGAG-------CCCGTTGTCCCCG----------------------------GGAGTAGCTGATCAGCTTATCTTTGGAGAGGGGACAAAGTTGACCG…
aV3.1m_T08_062512	GATCCAGTTTCCCAGAGCCCACCTCAGTTACCGGTTGAGGAA---GGACAAACGGTAATGTTGAACTGTAGTTACAAA---TCGTTGGTT------GCTACTGCTCTCTTCTGGTACGTCCAACATCCTGGGGAAGCTCTGAGATATTTACTGAGGGCGTACAAGGATGAAGAGTGGGAGAGCTCACCAGCTTTC------CGTGACCGGTTTTCTGCCAATTTGGACAAAGTCAAAAAAGTGGTCCCTTTGAGAATTAATGAAACCCGTCTGTCTGACTCAGCCATCTATTACTGCGCTCTGAG-------CCCGTTGTCCCCG----------------------------GGAGTAGCTGATCAGCTTATCTTTGGAGAGGGGACAAAGTTGACCG…
aV3.1m_T19_061812	GATCCAGTTTCCCAGAGCCCACCTCAGTTACCGGTTGAGGAA---GGACAAACGGTAATGTTGAACTGTAGTTACAAA---TCGTTGGTT------GCTACTGCTCTCTTCTGGTACGTCCAACATCCTGGGGAAGCTCTGAGATATTTACTGAGGGCGTACAAGGATGAAGAGTGGGAGAGCTCACCAGCTTTC------CGTGACCGGTTTTCTGCCAATTTGGACAAAGTCAAAAAAGTGGTCCCTTTGAGAATTAATGAAACCCGTCTGTCTGACTCAGCCATCTATTACTGCGCTCTGAG-------CCCGTTGTCCCCG----------------------------GGAGTAGCTGATCAGCTTATCTTTGGAGAGGGGACAAAGTTGACCG…
aV3.1m_T09_070912	GATCCAGTTTCCCAGAGCCCACCTCAGTTACCGGTTGAGGAA---GGACAAACGGTAATGTTGAACTGTAGTTACAAA---TCGTTGGTT------GCTACTGCTCTCTTCTGGTACGTCCAACATCCTGGGGAAGCTCTGAGATATTTACTGAGGGCGTACAAGGATGAAGAGTGGGAGAGCTCACCAGCTTTC------CGTGACCGGTTTTCTGCCAATTTGGACAAAGTCAAAAAAGTGGTCCCTTTGAGAATTAATGAAACCCGTCTGTCTGACTCAGCCATCTATTACTGCGCTCTGAG-------CCCGTTGTCCCCG----------------------------GGAGTAGCTGATCAGCTTATCTTTGGAGAGGGGACAAAGTTGACCG…
aV3.1m_T07_062612	GATCCAGTTTCCCAGAGCCCACCTCAGTTACCGGTTGAGGAA---GGACAAACGGTAATGTTGAACTGTAGTTACAAA---TCGTTGGTT------GCTACTGCTCTCTTCTGGTACGTCCAACATCCTGGGGAAGCTCTGAGATATTTACTGAGGGCGTACAAGGATGAAGAGTGGGAGAGCTCACCAGCTTTC------CGTGACCGGTTTTCTGCCAATTTGGACAAAGTCAAAAAAGTGGTCCCTTTGAGAATTAATGAAACCCGTCTGTCTGACTCAGCCATCTATTACTGCGCTCTGAG-------CCCGTTGTCCCCG----------------------------GGAGTAGCTGATCAGCTTATCTTTGGAGAGGGGACAAAGTTGACCG…
aV3.1m_T14_052410	GATCCAGTTTCCCAGAGCCCACCTCAGTTACCGGTTGAGGAA---GGACAAACGGTAATGTTGAACTGTAGTTACAAA---TCGTTGGTT------GCTACTGCTCTCTTCTGGTACGTCCAACATCCTGGGGAAGCTCTGAGATATTTACTGAGGGCGTACAAGGATGAAGAGTGGGAGAGCTCACCAGCTTTC------CGTGACCGGTTTTCTGCCAATTTGGACAAAGTCAAAAAAGTGGTCCCTTTGAGAATTAATGAAACCCGTCTGTCTGACTCAGCCATCTATTACTGCGCTCTGAG-------CCCGTTGTCCCCG----------------------------GGAGTAGCTGATCAGCTTATCTTTGGAGAGGGGACAAAGTTGACCG…
aV3.1m_T17_071712	GATCCAGTTTCCCAGAGCCCACCTCAGTTACCGGTTGAGGAA---GGACAAACGGTAATGTTGAACTGTAGTTACAAA---TCGTTGGTT------GCTACTGCTCTCTTCTGGTACGTCCAACATCCTGGGGAAGCTCTGAGATATTTACTGAGGGCGTACAAGGATGAAGAGTGGGAGAGCTCACCAGCTTTC------CGTGACCGGTTTTCTGCCAATTTGGACAAAGTCAAAAAAGTGGTCCCTTTGAGAATTAATGAAACCCGTCTGTCTGACTCAGCCATCTATTACTGCGCTCTGAG-------CCCGTTGTCCCCG----------------------------GGAGTAGCTGATCAGCTTATCTTTGGAGAGGGGACAAAGTTGACCG…
aV3.1m_T06_062012	GATCCAGTTTCCCAGAGCCCACCTCAGTTACCGGTTGAGGAA---GGACAAACGGTAATGTTGAACTGTAGTTACAAA---TCGTTGGTT------GCTACTGCTCTCTTCTGGTACGTCCAACATCCTGGGGAAGCTCTGAGATATTTACTGAGGGCGTACAAGGATGAAGAGTGGGAGAGCTCACCAGCTTTC------CGTGACCGGTTTTCTGCCAATTTGGACAAAGTCAAAAAAGTGGTCCCTTTGAGAATTAATGAAACCCGTCTGTCTGACTCAGCCATCTATTACTGCGCTCTGAG-------CCCGTTGTCCCCG----------------------------GGAGTAGCTGATCAGCTTATCTTTGGAGAGGGGACAAAGTTGACCG…
aV3.1m_T24_062512	GATCCAGTTTCCCAGAGCCCACCTCAGTTACCGGTTGAGGAA---GGACAAACGGTAATGTTGAACTGTAGTTACAAA---TCGTTGGTT------GCTACTGCTCTCTTCTGGTACGTCCAACATCCTGGGGAAGCTCTGAGATATTTACTGAGGGCGTACAAGGATGAAGAGTGGGAGAGCTCACCAGCTTTC------CGTGACCGGTTTTCTGCCAATTTGGACAAAGTCAAAAAAGTGGTCCCTTTGAGAATTAATGAAACCCGTCTGTCTGACTCAGCCATCTATTACTGCGCTCTGAG-------CCCGTTGTCCCCG----------------------------GGAGTAGCTGATCAGCTTATCTTTGGAGAGGGGACAAAGTTGACCG…
aV3.1m_T18_061812	GATCCAGTTTCCCAGAGCCCACCTCAGTTACCGGTTGAGGAA---GGACAAACGGTAATGTTGAACTGTAGTTACAAA---TCGTTGGTT------GCTACTGCTCTCTTCTGGTACGTCCAACATCCTGGGGAAGCTCTGAGATATTTACTGAGGGCGTACAAGGATGAAGAGTGGGAGAGCTCACCAGCTTTC------CGTGACCGGTTTTCTGCCAATTTGGACAAAGTCAAAAAAGTGGTCCCTTTGAGAATTAATGAAACCCGTCTGTCTGACTCAGCCATCTATTACTGCGCTCTGAG-------CCCGTTGTCCCCG----------------------------GGAGTAGCTGATCAGCTTATCTTTGGAGAGGGGACAAAGTTGACCG…
aV3.1m_T09_062012	GATCCAGTTTCCCAGAGCCCACCTCAGTTACCGGTTGAGGAA---GGACAAACGGTAATGTTGAACTGTAGTTACAAA---TCGTTGGTT------GCTACTGCTCTCTTCTGGTACGTCCAACATCCTGGGGAAGCTCTGAGATATTTACTGAGGGCGTACAAGGATGAAGAGTGGGAGAGCTCACCAGCTTTC------CGTGACCGGTTTTCTGCCAATTTGGACAAAGTCAAAAAAGTGGTCCCTTTGAGAATTAATGAAACCCGTCTGTCTGACTCAGCCATCTATTACTGCGCTCTGAG-------CCCGTTGTCCCCG----------------------------GGAGTAGCTGATCAGCTTATCTTTGGAGAGGGGACAAAGTTGACCG…
aV3.1m_T01_062612	GATCCAGTTTCCCAGAGCCCACCTCAGTTACCGGTTGAGGAA---GGACAAACGGTAATGTTGAACTGTAGTTACAAA---TCGTTGGTT------GCTACTGCTCTCTTCTGGTACGTCCAACATCCTGGGGAAGCTCTGAGATATTTACTGAGGGCGTACAAGGATGAAGAGTGGGAGAGCTCACCAGCTTTC------CGTGACCGGTTTTCTGCCAATTTGGACAAAGTCAAAAAAGTGGTCCCTTTGAGAATTAATGAAACCCGTCTGTCTGACTCAGCCATCTATTACTGCGCTCTGAG-------CCCGTTGTCCCCG----------------------------GGAGTAGCTGATCAGCTTATCTTTGGAGAGGGGACAAAGTTGACCG…
aV3.1m_T09_071712	GATCCAGTTTCCCAGAGCCCACCTCAGTTACCGGTTGAGGAA---GGACAAACGGTAATGTTGAACTGTAGTTACAAA---TCGTTGGTT------GCTACTGCTCTCTTCTGGTACGTCCAACATCCTGGGGAAGCTCTGAGATATTTACTGAGGGCGTACAAGGATGAAGAGTGGGAGAGCTCACCAGCTTTC------CGTGACCGGTTTTCTGCCAATTTGGACAAAGTCAAAAAAGTGGTCCCTTTGAGAATTAATGAAACCCGTCTGTCTGACTCAGCCATCTATTACTGCGCTCTGAG-------CCCGTTGTCCCCG----------------------------GGAGTAGCTGATCAGCTTATCTTTGGAGAGGGGACAAAGTTGACCG…
aV3.1m_T08_071712	GATCCAGTTTCCCAGAGCCCACCTCAGTTACCGGTTGAGGAA---GGACAAACGGTAATGTTGAACTGTAGTTACAAA---TCGTTGGTT------GCTACTGCTCTCTTCTGGTACGTCCAACATCCTGGGGAAGCTCTGAGATATTTACTGAGGGCGTACAAGGATGAAGAGTGGGAGAGCTCACCAGCTTTC------CGTGACCGGTTTTCTGCCAATTTGGACAAAGTCAAAAAAGTGGTCCCTTTGAGAATTAATGAAACCCGTCTGTCTGACTCAGCCATCTATTACTGCGCTCTGAG-------CCCGTTGTCCCCG----------------------------GGAGTAGCTGATCAGCTTATCTTTGGAGAGGGGACAAAGTTGACCG…
aV3.1m_T01_060612	GATCCAGTTTCCCAGAGCCCACCTCAGTTACCGGTTGAGGAA---GGACAAACGGTAATGTTGAACTGTAGTTACAAA---TCGTTGGTT------GCTACTGCTCTCTTCTGGTACGTCCAACATCCTGGGGAAGCTCTGAGATATTTACTGAGGGCGTACAAGGATGAAGAGTGGGAGAGCTCACCAGCTTTC------CGTGACCGGTTTTCTGCCAATTTGGACAAAGTCAAAAAAGTGGTCCCTTTGAGAATTAATGAAACCCGTCTGTCTGACTCAGCCATCTATTACTGCGCTCTGAG-------CCCGTTGTCCCCG----------------------------GGAGTAGCTGATCAGCTTATCTTTGGAGAGGGGACAAAGTTGACCG…
aV3.1m_T15_061812	GATCCAGTTTCCCAGAGCCCACCTCAGTTACCGGTTGAGGAA---GGACAAACGGTAATGTTGAACTGTAGTTACAAA---TCGTTGGTT------GCTACTGCTCTCTTCTGGTACGTCCAACATCCTGGGGAAGCTCTGAGATATTTACTGAGGGCGTACAAGGATGAAGAGTGGGAGAGCTCACCAGCTTTC------CGTGACCGGTTTTCTGCCAATTTGGACAAAGTCAAAAAAGTGGTCCCTTTGAGAATTAATGAAACCCGTCTGTCTGACTCAGCCATCTATTACTGCGCTCTGAG-------CCCGTTGTCCCCG----------------------------GGAGTAGCTGATCAGCTTATCTTTGGAGAGGGGACAAAGTTGACCG…
aV3.1m_T22_061812	GATCCAGTTTCCCAGAGCCCACCTCAGTTACCGGTTGAGGAA---GGACAAACGGTAATGTTGAACTGTAGTTACAAA---TCGTTGGTT------GCTACTGCTCTCTTCTGGTACGTCCAACATCCTGGGGAAGCTCTGAGATATTTACTGAGGGCGTACAAGGATGAAGAGTGGGAGAGCTCACCAGCTTTC------CGTGACCGGTTTTCTGCCAATTTGGACAAAGTCAAAAAAGTGGTCCCTTTGAGAATTAATGAAACCCGTCTGTCTGACTCAGCCATCTATTACTGCGCTCTGAG-------CCCGTTGTCCCCG----------------------------GGAGTAGCTGATCAGCTTATCTTTGGAGAGGGGACAAAGTTGACCG…
aV3.1m_T14_062612	GATCCAGTTTCCCAGAGCCCACCTCAGTTACCGGTTGAGGAA---GGACAAACGGTAATGTTGAACTGTAGTTACAAA---TCGTTGGTT------GCTACTGCTCTCTTCTGGTACGTCCAACATCCTGGGGAAGCTCTGAGATATTTACTGAGGGCGTACAAGGATGAAGAGTGGGAGAGCTCACCAGCTTTC------CGTGACCGGTTTTCTGCCAATTTGGACAAAGTCAAAAAAGTGGTCCCTTTGAGAATTAATGAAACCCGTCTGTCTGACTCAGCCATCTATTACTGCGCTCTGAG-------CCCGTTGTCCCCG----------------------------GGAGTAGCTGATCAGCTTATCTTTGGAGAGGGGACAAAGTTGACCG…
aV3.1m_T08_062012	GATCCAGTTTCCCAGAGCCCACCTCAGTTACCGGTTGAGGAA---GGACAAACGGTAATGTTGAACTGTAGTTACAAA---TCGTTGGTT------GCTACTGCTCTCTTCTGGTACGTCCAACATCCTGGGGAAGCTCTGAGATATTTACTGAGGGCGTACAAGGATGAAGAGTGGGAGAGCTCACCAGCTTTC------CGTGACCGGTTTTCTGCCAATTTGGACAAAGTCAAAAAAGTGGTCCCTTTGAGAATTAATGAAACCCGTCTGTCTGACTCAGCCATCTATTACTGCGCTCTGAG-------CCCGTTGTCCCCG----------------------------GGAGTAGCTGATCAGCTTATCTTTGGAGAGGGGACAAAGTTGACCG…
aV3.1m_T05_062512	GATCCAGTTTCCCAGAGCCCACCTCAGTTACCGGTTGAGGAA---GGACAAACGGTAATGTTGAACTGTAGTTACAAA---TCGTTGGTT------GCTACTGCTCTCTTCTGGTACGTCCAACATCCTGGGGAAGCTCTGAGATATTTACTGAGGGCGTACAAGGATGAAGAGTGGGAGAGCTCACCAGCTTTC------CGTGACCGGTTTTCTGCCAATTTGGACAAAGTCAAAAAAGTGGTCCCTTTGAGAATTAATGAAACCCGTCTGTCTGACTCAGCCATCTATTACTGCGCTCTGAG-------CCCGTTGTCCCCG----------------------------GGAGTAGCTGATCAGCTTATCTTTGGAGAGGGGACAAAGTTGACCG…
aV3.1m_T16_062612	GATCCAGTTTCCCAGAGCCCACCTCAGTTACCGGTTGAGGAA---GGACAAACGGTAATGTTGAACTGTAGTTACAAA---TCGTTGGTT------GCTACTGCTCTCTTCTGGTACGTCCAACATCCTGGGGAAGCTCTGAGATATTTACTGAGGGCGTACAAGGATGAAGAGTGGGAGAGCTCACCAGCTTTC------CGTGACCGGTTTTCTGCCAATTTGGACAAAGTCAAAAAAGTGGTCCCTTTGAGAATTAATGAAACCCGTCTGTCTGACTCAGCCATCTATTACTGCGCTCTGAG-------CCCGTTGTCCCCG----------------------------GGAGTAGCTGATCAGCTTATCTTTGGAGAGGGGACAAAGTTGACCG…
aV3.1m_T28_052410	GATCCAGTTTCCCAGAGCCCACCTCAGTTACCGGTTGAGGAA---GGACAAACGGTAATGTTGAACTGTAGTTACAAA---TCGTTGGTT------GCTACTGCTCTCTTCTGGTACGTCCAACATCCTGGGGAAGCTCTGAGATATTTACTGAGGGCGTACAAGGATGAAGAGTGGGAGAGCTCACCAGCTTTC------CGTGACCGGTTTTCTGCCAATTTGGACAAAGTCAAAAAAGTGGTCCCTTTGAGAATTAATGAAACCCGTCTGTCTGACTCAGCCATCTATTACTGCGCTCTGAG-------CCCGTTGTCCCCG----------------------------GGAGTAGCTGATCAGCTTATCTTTGGAGAGGGGACAAAGTTGACCG…
aV3.1m_T11_062512	GATCCAGTTTCCCAGAGCCCACCTCAGTTACCGGTTGAGGAA---GGACAAACGGTAATGTTGAACTGTAGTTACAAA---TCGTTGGTT------GCTACTGCTCTCTTCTGGTACGTCCAACATCCTGGGGAAGCTCTGAGATATTTACTGAGGGCGTACAAGGATGAAGAGTGGGAGAGCTCACCAGCTTTC------CGTGACCGGTTTTCTGCCAATTTGGACAAAGTCAAAAAAGTGGTCCCTTTGAGAATTAATGAAACCCGTCTGTCTGACTCAGCCATCTATTACTGCGCTCTGAG-------CCCGTTGTCCCCG----------------------------GGAGTAGCTGATCAGCTTATCTTTGGAGAGGGGACAAAGTTGACCG…
aV3.1m_T11_062012	GATCCAGTTTCCCAGAGCCCACCTCAGTTACCGGTTGAGGAA---GGACAAACGGTAATGTTGAACTGTAGTTACAAA---TCGTTGGTT------GCTACTGCTCTCTTCTGGTACGTCCAACATCCTGGGGAAGCTCTGAGATATTTACTGAGGGCGTACAAGGATGAAGAGTGGGAGAGCTCACCAGCTTTC------CGTGACCGGTTTTCTGCCAATTTGGACAAAGTCAAAAAAGTGGTCCCTTTGAGAATTAATGAAACCCGTCTGTCTGACTCAGCCATCTATTACTGCGCTCTGAG-------CCCGTTGTCCCCG----------------------------GGAGTAGCTGATCAGCTTATCTTTGGAGAGGGGACAAAGTTGACCG…
aV3.1m_T10_062012	GATCCAGTTTCCCAGAGCCCACCTCAGTTACCGGTTGAGGAA---GGACAAACGGTAATGTTGAACTGTAGTTACAAA---TCGTTGGTT------GCTACTGCTCTCTTCTGGTACGTCCAACATCCTGGGGAAGCTCTGAGATATTTACTGAGGGCGTACAAGGATGAAGAGTGGGAGAGCTCACCAGCTTTC------CGTGACCGGTTTTCTGCCAATTTGGACAAAGTCAAAAAAGTGGTCCCTTTGAGAATTAATGAAACCCGTCTGTCTGACTCAGCCATCTATTACTGCGCTCTGAG-------CCCGTTGTCCCCG----------------------------GGAGTAGCTGATCAGCTTATCTTTGGAGAGGGGACAAAGTTGACCG…
aV3.1m_T21_061812	GATCCAGTTTCCCAGAGCCCACCTCAGTTACCGGTTGAGGAA---GGACAAACGGTAATGTTGAACTGTAGTTACAAA---TCGTTGGTT------GCTACTGCTCTCTTCTGGTACGTCCAACATCCTGGGGAAGCTCTGAGATATTTACTGAGGGCGTACAAGGATGAAGAGTGGGAGAGCTCACCAGCTTTC------CGTGACCGGTTTTCTGCCAATTTGGACAAAGTCAAAAAAGTGGTCCCTTTGAGAATTAATGAAACCCGTCTGTCTGACTCAGCCATCTATTACTGCGCTCTGAG-------CCCGTTGTCCCCG----------------------------GGAGTAGCTGATCAGCTTATCTTTGGAGAGGGGACAAAGTTGACCG…
aV3.1m_T19_052410	GATCCAGTTTCCCAGAGCCCACCTCAGTTACCGGTTGAGGAA---GGACAAACGGTAATGTTGAACTGTAGTTACAAA---TCGTTGGTT------GCTACTGCTCTCTTCTGGTACGTCCAACATCCTGGGGAAGCTCTGAGATATTTACTGAGGGCGTACAAGGATGAAGAGTGGGAGAGCTCACCAGCTTTC------CGTGACCGGTTTTCTGCCAATTTGGACAAAGTCAAAAAAGTGGTCCCTTTGAGAATTAATGAAACCCGTCTGTCTGACTCAGCCATCTATTACTGCGCTCTGAG-------CCCGTTGTCCCCG----------------------------GGAGTAGCTGATCAGCTTATCTTTGGAGAGGGGACAAAGTTGACCG…
aV3.1m_T13_060612	GATCCAGTTTCCCAGAGCCCACCTCAGTTACCGGTTGAGGAA---GGACAAACGGTAATGTTGAACTGTAGTTACAAA---TCGTTGGTT------GCTACTGCTCTCTTCTGGTACGTCCAACATCCTGGGGAAGCTCTGAGATATTTACTGAGGGCGTACAAGGATGAAGAGTGGGAGAGCTCACCAGCTTTC------CGTGACCGGTTTTCTGCCAATTTGGACAAAGTCAAAAAAGTGGTCCCTTTGAGAATTAATGAAACCCGTCTGTCTGACTCAGCCATCTATTACTGCGCTCTGAG-------CCCGTTGTCCCCG----------------------------GGAGTAGCTGATCAGCTTATCTTTGGAGAGGGGACAAAGTTGACCG…
aV3.1m_T03_071712	GATCCAGTTTCCCAGAGCCCACCTCAGTTACCGGTTGAGGAA---GGACAAACGGTAATGTTGAACTGTAGTTACAAA---TCGTTGGTT------GCTACTGCTCTCTTCTGGTACGTCCAACATCCTGGGGAAGCTCTGAGATATTTACTGAGGGCGTACAAGGATGAAGAGTGGGAGAGCTCACCAGCTTTC------CGTGACCGGTTTTCTGCCAATTTGGACAAAGTCAAAAAAGTGGTCCCTTTGAGAATTAATGAAACCCGTCTGTCTGACTCAGCCATCTATTACTGCGCTCTGAG-------CCCGTTGTCCCCG----------------------------GGAGTAGCTGATCAGCTTATCTTTGGAGAGGGGACAAAGTTGACCG…
aV3.1m_T07_062012	GATCCAGTTTCCCAGAGCCCACCTCAGTTACCGGTTGAGGAA---GGACAAACGGTAATGTTGAACTGTAGTTACAAA---TCGTTGGTT------GCTACTGCTCTCTTCTGGTACGTCCAACATCCTGGGGAAGCTCTGAGATATTTACTGAGGGCGTACAAGGATGAAGAGTGGGAGAGCTCACCAGCTTTC------CGTGACCGGTTTTCTGCCAATTTGGACAAAGTCAAAAAAGTGGTCCCTTTGAGAATTAATGAAACCCGTCTGTCTGACTCAGCCATCTATTACTGCGCTCTGAG-------CCCGTTGTCCCCN----------------------------GGGAGTAGCTATCAGCTTATCTTTGGAGAGGGGACAAAGTTGACCG…
aV3.1m_T21_062012	GATCCAGTTTCCCAGAGCCCACCTCAGTTACCGGTTGAGGAA---GGACAAACGGTAATGTTGAACTGTAGTTACAAA---TCGTTGGTT------GCTACTGCTCTCTTCTGGTACGTCCAACATCCTGGGGAAGCTCTGAGATATTTACTGAGGGCGTACAAGGATGAAGAGTGGGAGAGCTCACCAGCTTTC------CGTGACCGGTTTTCTGCCAATTTGGACAAAGTCAAAAAAGTGGTCCCTTTGAGAATTAATGAAACCCGTCTGTCTGACTCAGCCATCTATTACTGCGCTCTGAG-------CCCGTTGTCCCCN----------------------------GGGAGTAGCTATCAGCTTATCTTTGGAGAGGGGACAAAGTTGACCG…
aV3.1m_T13_062512	GATCCAGTTTCCCAGAGCCCACCTCAGTTACCGGTTGAGGAA---GGACAAACGGTAATGTTGAACTGTAGTTACAAA---TCGTTGGTT------GCTACTGCTCTCTTCTGGTACGTCCAACATCCTGGGGAAGCTCTGAGATATTTACTGAGGGCGTACAAGGATGAAGAGTGGGAGAGCTCACCAGCTTTC------CGTGACCGGTTTTCTGCCAATTTGGACAAAGTCAAAAAAGTGGTCCCTTTGAGAATTAATGAAACCCGTCTGTCTGACTCAGCCATCTATTACTGCGCTCTGAG-------CCCGTTGTCCCCN----------------------------GGGAGTAGCTATCAGCTTATCTTTGGAGAGGGGACAAAGTTGACCG…
aV3.1m_T17_062512	GATCCAGTTTCCCAGAGCCCACCTCAGTTACCGGTTGAGGAA---GGACAAACGGTAATGTTGAACTGTAGTTACAAA---TCGTTGGTT------GCTACTGCTCTCTTCTGGTACGTCCAACATCCTGGGGAAGCTCTGAGATATTTACTGAGGGCGTACAAGGATGAAGAGTGGGAGAGCTCACCAGCTTTC------CGTGACCGGTTTTCTGCCAATTTGGACAAAGTCAAAAAAGTGGTCCCTTTGAGAATTAATGAAACCCGTCTGTCTGACTCAGCCATCTATTACTGCGCTCTGAG-------CCCGTTGTCCCCN----------------------------GGGAGTAGCTATCAGCTTATCTTTGGAGAGGGGACAAAGTTGACCG…
aV3.1m_T22_071712	GATCCAGTTTCCCAGAGCCCACCTCAGTTACCGGTTGAGGAA---GGACAAACGGTAATGTTGAACTGTAGTTACAAA---TCGTTGGTT------GCTACTGCTCTCTTCTGGTACGTCCAACATCCTGGGGAAGCTCTGAGATATTTACTGAGGGCGTACAAGGATGAAGAGTGGGAGAGCTCACCAGCTTTC------CGTGACCGGTTTTCTGCCAATTTGGACAAAGTCAAAAAAGTGGTCCCTTTGAGAATTAATGAAACCCGTCTGTCTGACTCAGCCATCTATTACTGCGCTCTGAG-------CCCGTTGTCCCCN----------------------------GGGAGTAGCTATCAGCTTATCTTTGGAGAGGGGACAAAGTTGACCG…
aV3.1m_T18_062012	GATCCAGTTTCCCAGAGCCCACCTCAGTTACCGGTTGAGGAA---GGACAAACGGTAATGTTGAACTGTAGTTACAAA---TCGTTGGTT------GCTACTGCTCTCTTCTGGTACGTCCAACATCCTGGGGAAGCTCTGAGATATTTACTGAGGGCGTACAAGGATGAAGAGTGGGAGAGCTCACCAGCTTTC------CGTGACCGGTTTTCTGCCAATTTGGACAAAGTCAAAAAAGTGGTCCCTTTGAGAATTAATGAAACCCGTCTGTCTGACTCAGCCATCTATTACTGCGCTCTGAG-------CCCGTTGTCCCCN----------------------------GGGAGTAGCTATCAGCTTATCTTTGGAGAGGGGACAAAGTTGACCG…
aV3.1m_T06_062612	GATCCAGTTTCCCAGAGCCCACCTCAGTTACCGGTTGAGGAA---GGACAAACGGTAATGTTGAACTGTAGTTACAAA---TCGTTGGTT------GCTACTGCTCTCTTCTGGTACGTCCAACATCCTGGGGAAGCTCTGAGATATTTACTGAGGGCGTACAAGGATGAAGAGTGGGAGAGCTCACCAGCTTTC------CGTGACCGGTTTTCTGCCAATTTGGACAAAGTCAAAAAAGTGGTCCCTTTGAGAATTAATGAAACCCGTCTGTCTGACTCAGCCATCTATTACTGCGCTCTGAG-------CCCGTTGTCCCCN----------------------------GGGAGTAGCTATCAGCTTATCTTTGGAGAGGGGACAAAGTTGACCG…
aV3.1m_T11_071712	GATCCAGTTTCCCAGAGCCCACCTCAGTTACCGGTTGAGGAA---GGACAAACGGTAATGTTGAACTGTAGTTACAAA---TCGTTGGTT------GCTACTGCTCTCTTCTGGTACGTCCAACATCCTGGGGAAGCTCTGAGATATTTACTGAGGGCGTACAAGGATGAAGAGTGGGAGAGCTCACCAGCTTTC------CGTGACCGGTTTTCTGCCAATTTGGACAAAGTCAAAAAAGTGGTCCCTTTGAGAATTAATGAAACCCGTCTGTCTGACTCAGCCATCTATTACTGCGCTCTGAG-------CCCGTTGTCCCCN----------------------------GGGAGTAGCTATCAGCTTATCTTTGGAGAGGGGACAAAGTTGACCG…
aV3.1m_T11_060512	GATCCAGTTTCCCAGAGCCCACCTCAGTTACCGGTTGAGGAA---GGACAAACGGTAATGTTGAACTGTAGTTACAAA---TCGTTGGTT------GCTACTGCTCTCTTCTGGTACGTCCAACATCCTGGGGAAGCTCTGAGATATTTACTGAGGGCGTACAAGGATGAAGAGTGGGAGAGCTCACCAGCTTTC------CGTGACCGGTTTTCTGCCAATTTGGACAAAGTCAAAAAAGTGGTCCCTTTGAGAATTAATGAAACCCGTCTGTCTGACTCAGCCATCTATTACTGCGCTCTGAG-------CCCGTTGTCCCCN----------------------------GGGAGTAGCTATCAGCTTATCTTTGGAGAGGGGACAAAGTTGACCG…
aV3.1m_T12_071712	GATCCAGTTTCCCAGAGCCCACCTCAGTTACCGGTTGAGGAA---GGACAAACGGTAATGTTGAACTGTAGTTACAAA---TCGTTGGTT------GCTACTGCTCTCTTCTGGTACGTCCAACATCCTGGGGAAGCTCTGAGATATTTACTGAGGGCGTACAAGGATGAAGAGTGGGAGAGCTCACCAGCTTTC------CGTGACCGGTTTTCTGCCAATTTGGACAAAGTCAAAAAAGTGGTCCCTTTGAGAATTAATGAAACCCGTCTGTCTGACTCAGCCATCTATTACTGCGCTCTGAG-------CCCGTTGTCCCCN----------------------------GGGAGTAGCTATCAGCTTATCTTTGGAGAGGGGACAAAGTTGACCG…
aV3.1m_T24_052410	GATCCAGTTTCCCAGAGCCCACCTCAGTTACCGGTTGAGGAA---GGACAAACGGTAATGTTGAACTGTAGTTACAAA---TCGTTGGTT------GCTACTGCTCTCTTCTGGTACGTCCAACATCCTGGGGAAGCTCTGAGATATTTACTGAGGGCGTACAAGGATGAAGAGTGGGAGAGCTCACCAGCTTTC------CGTGACCGGTTTTCTGCCAATTTGGACAAAGTCAAAAAAGTGGTCCCTTTGAGAATTAATGAAACCCGTCTGTCTGACTCAGCCATCTATTACTGCGCTCTGAG-------CCCGTTGTCCCCN----------------------------GGGAGTAGCTATCAGCTTATCTTTGGAGAGGGGACAAAGTTGACCG…
aV3.1m_T28_051410	GATCCAGTTTCCCAGAGCCCACCTCAGTTACCGGTTGAGGAA---GGACAAACTGTAATGTTGAACTGTAGTTACAAA---ACGTCGGGT------GCTGCTACTCTCTTCTGGTACGTCCAATATCCTGGGGAAGCTCCGAGATATTTATTGAGGGCGTACAAGGATGAAGAGTGGGAGAGCTCACCAGATTTC------CGTGACCGGTTTTCTGCCAATTTGGACAAAGTCAAAAACGTGGTCCCTTTGAGAATTAATGAAACCCGTCTGTCTGACTCAGCCATCTATTACTGCGCACTGAG-------AGGAC----------------------------------GGAGTGCATCAACACCACTGAAGTTCGGGAATGGGACCGAACTGATCG…
aV3.1J_V06_102810	GATCCAGTTTCCCAGAGCCCACCTCAGTTACCGGTTGAGGAA---GGACAAACTGTAATGTTGAACTGTAGTTACAAA---ACGTCGGGT------GCTGCTACTCTCTTCTGGTACGTCCAATATCCTGGGGAAGCTCCGAGATATTTACTGAGGGCGTACAAGGATGAAGAGAGGAAGAGCTCACCAGATTTC------CGTGACCGGTTTTCTGCCAATTTGGACAAAGTCAAAAAAGTGGTCCCTTTGAGAATTAATGAAACCCGTCTGTCTGACTCAGCCATCTATTACTGCGCACTGAG-------CTCGCTCTCG-------------------------ACAGGGAGTGCATCAACACCACTGAAGTTCGGGAATGGGACCGAACTGATCG…
aV3.1J_T18_100710	GATCCAGTTTCCCAGAGCCCACCTCAGTTACCGGTTGAGGAA---GGACAAACTGTAATGTTGAACTGTAGTTACAAA---ACGTCGGGT------GCTGCTACTCTCTTCTGGTACGTCCAATATCCTGGGGAAGCTCCGAGATATTTACTGAGGGCGTACAAGGATGAAGAGAGGAAGAGCTCACCAGATTTC------CGTGACCGGTTTTCTGCCAATTTGGACAAAGTCAAAAAAGTGGTCCCTTTGAGAATTAATGAAACCCGTCTGTCTGACTCAGCCATCTATTACTGCGCACTGAG-------CTCGCTCTCG-------------------------ACAGGGAGTGCATCAACACCACTGAAGTTCGGGAATGGGACCGAACTGATCG…
aV3.1m_T33_051410	GATCCAGTTTCCCAGAGCCCACCTCAGTTACCGGTTGAGGAA---GGACAAACGGTAATGTTGAACTGTAGTTACAAA---TCGTTGGTT------GCTACTGCTCTCTTCTGGTACGTCCAACATCCTGGGGAAGCTCTGAGATATTTACTGAGGGCGTACAAGGATGAAGAGTGGGAGAGCTCACCAGCTTTC------CGTGACCGGTTTTCTGCCAATTTGGACAAAGTCAAAAAAGTGGTCCCTTTGAGAATTAATGAAACCCGTCTGTCTGACTCAGCCATCTATTACTGCGCTCTG---------TCGGATGGG--------------------------ACAGGGAGTGCATCAACACCACTGAAGTTCGGGAATGGGACCGAACTGATCG…
aV3.1m_T34_051410	GATCCAGTTTCCCAGAGCCCACCTCAGTTACCGGTTGAGGAA---GGACAAACGGTAATGTTGAACTGTAGTTACAAA---TCGTTGGTT------GCTACTGCTCTCTTCTGGTACGTCCAACATCCTGGGGAAGCTCTGAGATATTTACTGAGGGCGTACAAGGATGAAGAGTGGGAGAGCTCACCAGCTTTC------CGTGACCGGTTTTCTGCCAATTTGGACAAAGTCAAAAAAGTGGTCCCTTTGAGAATTAATGAAACCCGTCTGTCTGACTCAGCCATCTATTACTGCGCTCTGAG-------CTCGGATGGG-------------------------ACAGGGAGTGCATCAACACCACTGAAGTTCGGGAATGGGACCGAACTGATCG…
aV3.1m_T15A_060712	GATCCAGTTTCCCAGAGCCCACCTCAGTTACCGGTTGAGGAA---GGACAAACGGTAATGTTGAACTGTAGTTACAAA---TCGTTGGTT------GCTACTGCTCTCTTCTGGTACGTCCAACATCCTGGGGAAGCTCTGAGATATTTACTGAGGGCGTACAAGGATGAAGAGTGGGAGAGCTCACCAGCTTTC------CGTGACCGGTTTTCTGCCAATTTGGACAAAGTCAAAAAAGTGGTCCCTTTGAGAATTAATGAAACCCGTCTGTCTGACTCAGCCATCTATTACTGCGCTCTGAG-------CCCT-------------------------------ACAGGGAGTGCATCAACACCACTGAAGTTCGGGAATGGGACCGAACTGATCG…
aV3.1m_T02A_060712	GATCCAGTTTCCCAGAGCCCACCTCAGTTACCGGTTGAGGAA---GGACAAACGGTAATGTTGAACTGTAGTTACAAA---TCGTTGGTT------GCTACTGCTCTCTTCTGGTACGTCCAACATCCTGGGGAAGCTCTGAGATATTTACTGAGGGCGTACAAGGATGAAGAGTGGGAGAGCTCACCAGCTTTC------CGTGACCGGTTTTCTGCCAATTTGGACAAAGTCAAAAAAGTGGTCCCTTTGAGAATTAATGAAACCCGTCTGTCTGACTCAGCCATCTATTACTGCGCTCTGAG-------CTCGTATC-------------------------------------------CACCACTGAAGTTCGGGAATGGGACCGAACTGATCG…
aV3.1m_T22_051410	GATCCAGTTTCCCAGAGCCCACCTCAGTTACCGGTTGAGGAA---GGACAAACGGTAATGTTGAACTGTAGTTACAAA---TCGTTGGTT------GCTACTGCTCTCTTCTGGTACGTCCAACATCCTGGGGAAGCTCTGAGATATTTACTGAGGGCGTACAAGGATGAAGAGTGGGAGAGCTCACCAGCTTTC------CGTGACCGGTTTTCTGCCAATTTGGACAAAGTCAAAAAAGTGGTCCCTTTGAGAATTAATGAAACCCGTCTGTCTGACTCAGCCATCTATTACTGCGCTCTGAG-------CCGG-------------------------------------AATGCTAACTACGAGCTTATCTTCGGAGGTGGGACAAGACTGGTAG…
aV3.1J_V11_091010	GATTCAGTTTCCCAGAGCCCACCTCAGTTACCGGTTGAGGAA---GGACAAACGGTAATATTGAATTGTAGTTACAAA---TCGTTGGTT------GTTACTGCTCTCTTCTGGTACGTCCAACATCCTGGGGAAGCTCTGAGATATCTACTGAGGGCGTACAAGGATGAAGAGTGGGAGAGTTTACCAGCTTTT------CGTGACCGGTTTTCTGCCAATTTGGACAAAGTCAAAAAAGTGGTTCCTTTGAGAATTAATGAAACCCGTCTGTCTGACTCAGCCATCTATTACTGCGCTCTGA--------ACTCTCCCAACAGC------------------------------------------CTTACATTCGGAAGTGGGACTGAACTCACTG…
aV3.1J_V04_091410	GATTCAGTTTCCCAGAGCCCACCTCAGTTACCGGTTGAGGAA---GGACAAACGGTAATATTGAACTGTAGTTACAAA---TCGTTGGTT------ACTACTGCTCTCTTCTGGTACGTCCAACATCCTGGGCAATCTCTGAGATATTTGCTACGGGCGTACAATGATGAAGAGTGGGAATGCTCACCAGCTTTC------CGTGACCGGTTTTCTGCCAATTTGGACAAAGTCAAAAAAGTGGTCCCTTTGAGAATTAATGAAACCCGTCTGTCTGACTCAGCCATCTATTACTGCGCTCTGAG-------CTCGCGGCCGCTTGGTGTC-------------------------------AACAGCCTTATCTTTGGAGGTGGGACCAGACTGATCG…
aV3.1J_V10_102810	GATTCAGTTTCCCAGAGTCCACCTCAGTTACTGATTGAGGAA---GGACAAACGGTTAATTTGAACTGTAGTTACAAA---TCCTTGGTT------GCTACCTATCTCTTCTGGTACGTCCAACATCCGGAAGAATCTCTGAGATATTTACTGAGGGCGGATAAGGATGAAGAGTGGGAGACCTCACCAGCATTC------CGTGACCGGTTTTCTGCCAATTTGGACAAAGTCAAAAAAGTGGTCCCTTTTAGAATTAATGAAACCCGTCTGTCTGACTCAGCCATCTATTACTGCGCTCTGAG-------CCCCGGTGCAACCAG-------------------------------------CAAGATTATCTTTGGCGGTGGGACCAGACTGATAG…
aV3.1J_T07_100710	GATTCAGTTTCCCAGAGCCCACCTCAGTTATCGGTTGAGGAA---GGACAAACGGTAATGTTGAACTGTGGTTACAAA---TCGTCGGCT------GCTAGGGCTCTCTTCTGGTACGTCCAACATCCTGGGGAAGCTCTGAGATATTTACTGAGGGCGTACAAGGATGAAGAGTGGGAGAGCTCACCAGCTTTC------CGTGACCGGTTTTCTGCCAATTTGGACAAAGTCAAAAAAGTGGTCCCTTTGAGAATTAATGAAACCCGTCTGTCTGACTCAGCCATCTATCACTGTGCACTGAG-------CCCTACA-------------------------------------GGCGTTGGCAAGCTTATCTTTGGAGGTGGGACCAGACTGACAG…
aV3.1B_A_419.12	GATTCAGTTTCCCAGAGCCCACCTCAGTTACCGGTTGAGGAA---GGACAAACGGTAATGTTGAACTGTAGTTACAAA---TCGTTGGTT------GCTACTGCTCTCTTCTGGTACGTCCAACATCCTGGGGAAGCTCTGAGATATTTACTGAGGGCGTACAAGGATGAAGAGTGGGAGAGCTCACCAGCTTTC------CGTGACCGGTTTTCTGCCAATTTGGACAAAGTCAAAAAAGTGGTCCCTTTGAGAATTAATGAAACCCGTCTGTCTGACTCAGCCATCTATTACTGCGCTCTGAG-------CTCGAGGAATGAT----------------------------------GGCATCAGCCTTATCTTTGGAAATGGGACCAGACTGACAG…
aV3.1J_T11_100710	GATTCAGTTTCCCAGAGCCCACCTCAGTTACCGGTTGAGGAA---GGACAAACGGTAATGTTGAACTGTAGTTACAAA---TCGTTGGTT------GCTACTGCTCTCTTCTGGTACGTCCAACATCCTGGGGAAGCTCTGAGATATTTACTGAGGGCGTACAAGGATGAAGAGTGGGAGAGCTCACCAGCTTTC------CGTGACCGGTTTTCTGCCAATTTGGACAAAGTCAAAAAAGTGGTCCCTTTGAGAATTAATGAAACCCGTCTGTCTGACTCAGCCATCTATTACTGCGCTCTC---------CGTCCTGGAAACAACTAC-----------------------------------AGGGTTATATTTGGAAATGGCACCAAGCTGACTG…
aV3.1J_T14_100410	GATTCAGTTTCCCAGAGCCCACCTCAGTTACCGGTTGAGGAA---GGACAAACGGTAATGTTGAACTGTAGTTACAAA---TCGTTGGTT------GCTACTGCTCTCTTCTGGTACGTCCAACATCCTGGGGAAGCTCTGAGATATTTACTGAGGGCGTACAAGGATGAAGAGTGGGAGAGCTCACCAGCTTTC------CGTGACCGGTTTTCTGCCAATTTGGACAAAGTCAAAAAAGTGGTCCCTTTGAGAATTAATGAAACCCGTCTGTCTGACTCAGCCATCTATTACTGCGCTCTG---------GAGCAGTAT--------------------------------GATGGCACCAGGAAGCTTATCTTTGGAGATGGGACCAGACTGATCG…
aV3.1m_T10A_060712	GATCCAGTTTCCCAGAGCCCACCTCAGTTACCGGTTGAGGAA---GGACAAACGGTAATGTTGAACTGTAGTTACAAA---TCGTTGGTT------GCTACTGCTCTCTTCTGGTACGTCCAACATCCTGGGGAAGCTCTGAGATATTTACTGAGGGCGTACAAGGATGAAGAGTGGGAGAGCTCACCAGCTTTC------CGTGACCGGTTTTCTGCCAATTTGGACAAAGTCAAAAAAGTGGTCCCTTTGAGAATTAATGAAACCCGTCTGTCTGACTCAGCCATCTATTACTGCGCTCTG--------------------------------------------------GATGGCACCAACAACCTTATCTTTGGAGGTGGGACCAGACTGATCG…
aV3.1m_T25_051410	GATCCAGTTTCCCAGAGCCCACCTCAGTTACCGGTTGAGGAA---GGACAAACGGTAATGTTGAACTGTAGTTACAAA---TCGTTGGTT------GCTACTGCTCTCTTCTGGTACGTCCAACATCCTGGGGAAGCTCTGAGATATTTACTGAGGGCGTACAAGGATGAAGAGTGGGAGAGCTCACCAGCTTTC------CGTGACCGGTTTTCTGCCAATTTGGACAAAGTCAAAAAAGTGGTCCCTTTGAGAATTAATGAAACCCGTCTGTCTGACTCAGCCATCTATTACTGCGCA------------CAGGGAGGTAACACCA--------------------------------------AGCTTCTCTTTGGGAGTGGGACAAAACTAACTG…
aV3.1m_T18A_060712	GATCCAGTTTCCCAGAGCCCACCTCAGTTACCGGTTGAGGAA---GGACAAACGGTAATGTTGAACTGTAGTTACAAA---TCGTTGGTT------GCTACTGCTCTCTTCTGGTACGTCCAACATCCTGGGGAAGCTCTGAGATATTTACTGAGGGCGTACAAGGATGAAGAGTGGGAGAGCTCACCAGCTTTC------CGTGACCGGTTTTCTGCCAATTTGGACAAAGTCAAAAAAGTGGTCCCTTTGAGAATTAATGAAACCCGTCTGTCTGACTCAGCCATCTATTACTGCGCTCTGAG-------CTCGTGGG----------------------------------------ACACCAAGCTTATCTTTGGAGAAGGGACCAGACTAACAG…
aV3.1m_T23A_060712	GATCCAGTTTCCCAGAGCCCACCTCAGTTACCGGTTGAGGAA---GGACAAACTGTAATGTTGAACTGTAGTTACAAA---ACACCGGGT------GCTGCTACTCTCTTCTGGTACGTCCACCGTCCTGGGGAAGCTCCGAGATATTTACTGAGGGCGGCTAAGGATGAAGAGAGGAAGACCTCACCAGATTTC------CGTGACCGGTTTTCTGCCAATTTGGACAAAGTCAAAAAAGTGGTCCCTTTGAGGGTTAATGAAACCCGTCTGTCTGACTCAGCCATCTATTACTGCGCACTGAG-------TTCCACTGATTCAGGGGGTGCCACTCCAATAA----------------------------TATTCGGGAACGGGACTGAACTGACCG…
aV3.1m_T27_051410	GATCCAGTTTCCCAGAGCCCACCTCAGTTACCGGTTGAGGAA---GGACAAACTGTAATGTTGAACTGTAGTTACAAA---ACGTCGGGT------GCTGCTTCTCTCTTCTGGTACGTCCAATATCCTGGGGAAGCTCCGAGATATTTACTGAGGGCGTACAAGGATGAAGAGTGGGAGAGCTCACCAGATTTC------CGTGACCGGTTTTCTGCCAATTTGGACAAAGTCAAAAACGTGGTCCCTTTGAGAATTAATGAAACCCGTCTGTCTGACTCAGCCATCTATTACTGCGCACTGAG-------CTCTGGGGGTTACAGC-------------------------------------AAAACAGTATTTGGAGCTGGGACCAGACTCATCG…
aV3.1m_T17A_060712	GATCCAGTTTCCCAGAGCCCACCTCAGTTACCGGTTGAGGAA---GGACAAACTGTAATGTTGAACTGTAGTTACAAA---ACGTCGGGT------GCTGCTACTCTCTTCTGGTACGTCCAATATCCTGGGGAAGCTCCGAGATATTTATTGAGGGCGTACAAGGATGAAGAGTGGGAGAGCTCACCAGATTTC------CGTGACCGGTTTTCTGCCAATTTGGACAAAGTCAAAAACGTGGTCCCTTTGAGAATTAATGAAACCCGTCTGTCTGACTCAGCCATCTATTACTGCGCACTGA--------TTGTAGGCACTGAA---------------------------------------AGACTCACTTTTGGAACTGGGACTCAATTGATAG…
aV3.1m_T10_052410	GATCCAGTTTCCCAGAGCCCACCTCAGTTACCGGTTGAGGAA---GGACAAACTGTAATGTTGAACTGTAGTTACAAA---ACGTCGGGT------GCTGCTACTCTCTTCTGGTACGTCCAATATCCTGGGGAAGCTCCGAGATATTTATTGAGGGCGTACAAGGATGAAGAGTGGGAGAGCTCACCAGATTTC------CGTGACCGGTTTTCTGCCAATTTGGACAAAGTCAAAAACGTGGTCCCTTTGAGAATTAATGAAACCCGTCTGTCTGACTCAGCCATCTATTACTGCGCACTGAG-------CTCGTCGAACTTTGGAGGTAACAC----------------------------CAAGCTTCTCTTTGGGAGTGGGACAAAACTAACTG…
aV3.1m_T35_051410	GATCCAGTTTCCCAGAGCCCACCTCAGTTACCGGTTGAGGAA---GGACAAACTGTAATGTTGAACTGTAGTTACAAA---ACGTCGGGT------GCTGCTTCTCTCTTCTGGTACGTCCAATATCCTGGGGAAGCTCCGAGATATTTACTGAGGGCGTACAAGGATGAAGAGTGGGAGAGCTCACCAGATTTC------CGTGACCGGTTTTCTGCCAATTTGGACAAAGTCAAAAACGTGGTCCCTTTGAGAATTAATGAAACCCGTCTGTCTGACTCAGCCATCTATTACTGCGCACTGAGT------G-----------------------------------------ATGCAACCAACAAGCTTATCTTTGGCGGTGGGACCAGACTGATAG…
aV3.1m_T20A_060712	GATCCAGTTTCCCAGAGCCCACCTCAGTTACCGGTTGAGGAA---GGACAAACTGTAATGTTGAACTGTAGTTACAAA---ACGTCGGGT------GCTGCTACTCTCTTCTGGTACGTCCAATATCCTGGGGAAGCTCCGAGATATTTACTGAGGGCGTACAAGGATGAAGAGAGGAAGAGCTCACCAGATTTC------CGTGACCGGTTTTCTGCCAATTTGGACAAAGTCAAAAAAGTGGTCCCTTTGAGAATTAATGAAACCCGTCTGTCTGACTCAGCCATCTATTACTGCGCACTGAG-------CTCGGAC----------------------------------GATGCAACCAACAAGCTTATCTTTGGCGGTGGGACCAGACTGATAG…
aV3.1m_T29_051410	GATCCAGTTTCCCAGAGCCCACCTCAGTTACCGGTTGAGGAA---GGACAAACTGTAATGTTGAACTGTAGTTACAAA---ACGTCGGGT------GCTGCTACTCTCTTCTGGTACGTCCAATATCCTGGGGAAGCTCCGAGATATTTATTGAGGGCGTACAAGGATGAAGAGTGGGAGAGCTCACCAGATTTC------CGTGACCGGTTTTCTGCCAATTTGGACAAAGTCAAAAACGTGGTCCCTTTGAGAATTAATGAAACCCGTCTGTCTGACTCAGCCATCTATTACTGCGC-------------CCGAAGGAAGGAT-------------------------------GCAGCCAACAGGCTTATCTTTGGAGGTGGGACCAGACTGATAG…
aV3.1m_T23_051410	GATCCAGTTTCCCAGAGCCCACCTCAGTTACCGGTTGAGGAA---GGACAAACTGTAATGTTGAACTGTAGTTACAAA---ACGTCGGGT------GCTGCTACTCTCTTCTGGTACGTCCAATATCCTGGGGAAGCTCCGAGATATTTATTGAGGGCGTACAAGGATGAAGAGTGGGAGAGCTCACCAGATTTC------CGTGACCGGTTTTCTGCCAATTTGGACAAAGTCAAAAACGTGGTCCCTTTGAGAATTAATGAAACCCGTCTGTCTGACTCAGCCATCTATTACTGCGCACTG---------CC-----------------------------------------TGGCACCAACAACCTTATCTTTGGAGGTGGGACCAGACTGATCG…
aV3.1m_T26_051410	GATCCAGTTTCCCAGAGCCCACCTCAGTTACCGGTTGAGGAA---GGACAAACTGTAATGTTGAACTGTAGTTACAAA---ACGTCGGGT------GCTGCTTCTCTCTTCTGGTACGTCCAATATCCTGGGGAAGCTCCGAGATATTTACTGAGGGCGTACAAGGATGAAGAGTGGGAGAGCTCACCAGATTTC------CGTGACCGGTTTTCTGCCAATTTGGACAAAGTCAAAAACGTGGTCCCTTTGAGAATTAATGAAACCCGTCTGTCTGACTCAGCCATCTATTACTGCGCACTGAG-------CTCGCGTCAT----------------------------------GCCAACTACGAGCTTATCTTCGGAGGTGGGACAAGACTGGTAG…
aV3.1m_T08A_060712	GATCCAGTTTCCCAGAGCCCACCTCAGTTACCGGTTGAGGAA---GGACAAACTGTAATGTTGAACTGTAGTTACAAA---ACGTCGGGT------GCTGCTACTCTCTTCTGGTACGTCCAATATCCTGGGGAAGCTCCGAGATATTTACTGAGGGCGTACAAGGATGAAGAGAGGAAGAGCTCACCAGATTTC------CGTGACCGGTTTTCTGCCAATTTGGACAAAGTCAAAAAAGTGGTCCCTTTGAGAATTAATGAAACCCGTCTGTCTGACTCAGCCATCTATTACTGCGCACTGAG-------CAGACGATATACTAACAACTAC-------------------------------AAGTTTATCTTTGGAGCGGGGACCAGACTGACAG…
aV3.1m_T32_051410	GATCCAGTTTCCCAGAGCCCACCTCAGTTACCGGTTGAGGAA---GGACAAACTGTAATGTTGAACTGTAGTTACAAA---ACGTCGGGT------GCTGCTTCTCTCTTCTGGTACGTCCAATATCCTGGGGAAGCTCCGAGATATTTACTGAGGGCGTACAAGGATGAAGAGTGGGAGAGCTCACCAGATTTC------CGTGACCGGTTTTCTGCCAATTTGGACAAAGTCAAAAACGTGGTCCCTTTGAGAATTAATGAAACCCGTCTGTCTGACTCAGCCATCTATTACTGCGCACTGAG-------CCCGAGAT----------------------------------ATGGCACCAGGAAGCTTATCTTTGGAGATGGGACCAGACTGATCG…
aV3.1m_T21_051410	GATCCAGTTTCCCAGAGCCCACCTCAGTTACCGGTTGAGGAA---GGACAAACTGTAATGTTGAACTGTAGTTACAAA---ACGTCGGGT------GCTGCTTCTCTCTTCTGGTACGTCCAATATCCTGGGGAAGCTCCGAGATATTTACTGAGGGCGTACAAGGATGAAGAGTGGGAGAGCTCACCAGATTTC------CGTGACCGGTTTTCTGCCAATTTGGACAAAGTCAAAAACGTGGTCCCTTTGAGAATTAATGAAACCCGTCTGTCTGACTCAGCCATCTATTACTGCGCACTG---------TCGGCT-----------------------------------------GGCATCAGCCTTATCTTTGGAAATGGGACCAGACTGACAG…
aV3.1m_T13A_060712	GATCCAGTTTCCCAGAGCCCACCTCAGTTACCGGTTGAGGAA---GGACAAACTGTAATGTTGAACTGTAGTTACAAA---ACGTCGGGT------GCTGCTTCTCTCTTCTGGTACGTCCAATATCCTGGGGAAGCTCCGAGATATTTACTGAGGGCGTACAAGGATGAAGAGTGGGAGAGCTCACCAGATTTC------CGTGACCGGTTTTCTGCCAATTTGGACAAAGTCAAAAACGTGGTCCCTTTGAGAATTAATGAAACCCGTCTGTCTGACTCAGCCATCTATTACTGCGCACTGAG-------CCGGTCCCGCGCTAACGCC----------------------------------AAGTTTATCTTTGGAGGTGGAACAAGACTGATCG…
aV3.1m_T11A_060712	GATCCAGTTTCCCAGAGCCCACCTCAGTTACCGGTTGAGGAA---GGACAAACTGTAATGTTGAACTGTAGTTACAAA---ACGTCGGGT------GCTGCTTCTCTCTTCTGGTACGTCCAATATCCTGGGGAAGCTCCGAGATATTTACTGAGGGCGTACAAGGATGAAGAGTGGGAGAGCTCACCAGATTTC------CGTGACCGGTTTTCTGCCAATTTGGACAAAGTCAAAAACGTGGTCCCTTTGAGAATTAATGAAACCCGTCTGTCTGACTCAGCCATCTATTACTGCGCA------------ACCCCGTTGAATAGCTTGGACGTG--------------------------------CTAACATTTGGATCTGGGACCAAGCTGACGG…
aV3.1m_T04A_060712	GATCCAGTTTCCCAGAGCCCACCTCAGTTACCGGTTGAGGAA---GGACAAACTGTAATGTTGAACTGTAGTTACAAA---ACGTCGGGT------GCTGCTTCTCTCTTCTGGTACGTCCAATATCCTGGGGAAGCTCCGAGATATTTACTGAGGGCGTACAAGGATGAAGAGTGGGAGAGCTCACCAGATTTC------CGTGACCGGTTTTCTGCCAATTTGGACAAAGTCAAAAACGTGGTCCCTTTGAGAATTAATGAAACCCGTCTGTCTGACTCAGCCATCTATTACTGCGCACT----------CCATGCT-------------------------------GGAGCAGCTGGTTTTAAGCTGATGTTTGGAGAGGGTACAAAGTTAACTG…
aV3.1m_T30_051410	GATCCAGTTTCCCAGCGCCCACCTCAGTTACCGGTTGAGGAA---GGACAAACTGTAATGTTGAACTGTAGTTACAAA---ACGTCGGGT------GCTGCTACTCTCTTCTGGTACGTCCAATATCCTGGGGAAGCTCCGAGATATTTATTGAGGGCGTACAAAGATGAACAGTGGGAGAGCTCACCAGATTTC------CGTGACCGGTTTTCTGCCAATTTGGACAAAGTCAAAAACGTGGTCCCTTTGAGAATTAATGAAACCCGTCTGTCTGACTCAGCCATCTATTACTGCACACTGAG-------TCAATGGGGAGCTGGGACT----------------------------------AAGCTTACCTTTGGAGAGGGGACAAAGTTAGCTG…
aV3.1m_T24_051410	GATCCAGTTTCCCAGAGCCCACCTCAGTTACCGGTTGAGGAA---GGACAAACTGTAATGTTGAACTGTAGTTACAAA---ACGTCGGGT------GCTGCTTCTCTCTTCTGGTACGTCCAATATCCTGGGGAAGCTCCGAGATATTTACTGAGGGCGTACAAGGATGAAGAGTGGGAGAGCTCACCAGATTTC------CGTGACCGGTTTTCTGCCAATTTGGACAAAGTCAAAAACGTGGTCCCTTTGAGAATTAATGAAACCCGTCTGTCTGACTCAGCCATCTATTACTGCGCACTGAG-------CTCGATCTCGTCGCTTGCN----------------------GGAGCTGGTTACAAGCTTACCTTTGGACAGGGGACAAAGTTAACCG…
aV3.1m_T16A_060712	GATCCAGTTTCCCAGAGCCCACCTCAGTTACCGGTTGAGGAA---GGACAAACTGTAATGTTGAACTGTAGTTACAAA---ACGTCGGGT------GCTGCTACTCTCTTCTGGTACGTCCAATATCCTGGGGAAGCTCCGAGATATTTACTGAGGGCGTACAAGGATGAAGAGAGGAAGAGCTCACCAGATTTC------CGTGACCGGTTTTCTGCCAATTTGGACAAAGTCAAAAAAGTGGTCCCTTTGAGAATTAATGAAACCCGTCTGTCTGACTCAGCCATCTATTACTGCGCACTGAG-------CTCGAGA-------------------------------GCTGGAGGGTTTAATAAGCTTATCTTTGGAGAGGGGACAAAGTTAACCG…
aV3.1J_V19_101310	GATCCAGTTTCCCAGAGCCCACCTCAGTTACCGGTTGAGGAA---GGACAAACTGTAAGTTTGAACTGTAGTTACAAA---ACGTCGGGT------GCTGCTACTCTCTTCTGGTACGTCCAATATCCTGGGGAAGCTCCGAGATATTTACTGAGGGCGTACAAGGATGAAGAGAGGAAGAGCTCACCAGATTTC------CGTGACCGGTTTTCTGCCAATTTGGACAAAGTCAAAAAAGTGGTCCCTTTGAGAATTAATGAAACCCGTCTGTCTGACTCAGCCATCTATTACTGCGCA------------GCG--------------------------------------GATGGCACCTACAAGCTTATCTTTGGAGGTGGGACCAGACTGACAG…
aV3.1J_V18_091010	GATCCAGTTTCCCAGAGCCCACCTCAGTTACCGGTTGAGGAA---GGACAAACTGTAAGTTTGAACTGTAGTTACAAA---ACGTCGGGT------GCTGCTACTCTCTTCTGGTACGTCCAATATCCTGGGGAAGCTCCGAGATATTTACTGAGGGCGTACAAGGATGAAGAGAGGAAGAGCTCACCAGATTTC------CGTGACCGGTTTTCTGCCAATTTGGACAAAGTCAAAAAAGTGGTCCCTTTGAGAATTAATGAAACCCGTCTGTCTGACTCAGCCATCTATTACTGCGCA------------GCG--------------------------------------GATGGCACCTACAAGCTTATCTTTGGAGGTGGGACCAGACTGACAG…
aV3.1J_V22_102810	GATCCAGTTTCCCAGAGCCCACCTCAGTTACCGGTTGAGGAA---GGACAAACTGTAATGTTGAACTGTAGTTACAAA---GCGGGGGGT------GCTGCTACTCTCTTCTGGTACGTCCAATATCCTGGGGAAGCTCCGAGATATTTACTGAGGGCGTACAAGGATGAAGAGAGGAAGAGCTCACCAGATTTC------CGTGACCGGTTTTCTGCCAATTTGGACAAAGTCAAAAAAGTGGTCCCTTTGAGAATTAATGAAACCCGTCTGTCTGACTCAGCCATCTATTACTGCGCA------------GCG--------------------------------------GATCACACCTACAAGCTTATCTTTGGAGGTGGGACCAGACTGACAG…
aV3.1J_V19_091010	GATCCAGTTTCCCAGAGCCCACCTCAGTTACCGGTTGAGGAA---GGACAAACTGTAATGTTGAACTGTAGTTACAAA---ACGTCGGGT------GCTGCTACTCTCTTCTGGTACGTCCAATATCCTGGGGAAGCTCCGAGATATTTACTGAGGGCGTACAAGGATGAAGAGAGGAAGAGCTCAGCAGATTTC------CGTGACCGGTTTTCTGCCAATTTGGACAAAGTCAAAAAAGTGGTCCCTTTGAGAATTAATGAAACCCGTCTGTCTGACTCAGCCATCTATTACTGCGCA------------GCG--------------------------------------GATGGCACCTACAAGCTTATCTTTGGAGGTGGGACCAGACTGACAG…
aV3.1J_T21_100410	GATCCAGTTTCCCAGAGCCCACCTCAGTTACCGGTTGAGGAA---GGACAAACTGTAATGTTGAACTGTAGTTACAAA---ACGTCGGGT------GCTGCTACTCTCTTCTGGTACGTCCAATATCCTGGGGAAGCTCCGAGATATTTACTGAGGGCGTACAAGGATGAAGAGAGGAAGAGCTCACCAGATTTC------CGTGACCGGTTTTCTGCCAATTTGGACAAAGTCAAAAAAGTGGTCCCTTTGAGAATTAATGAAACCCGTCTGTCTGACTCAGCCATCTATTACTGCGCAC-----------CAAGAAACAACTAC---------------------------------------AGGGTTATATTTGGAAATGGCACCAAGCTGACTG…
aV3.1B_A_419.11	GATGTAGTTTCCCAGAGCCCACCTCGGTTACCGGTTGAGGAA---GGACAAACTGTAATGTTGAACTGTAGTTACAAA---ACGTCGGGT------GCTGCTACTCTCTTCTGGTACGTCCAATATCCTGGGGAAGCTCCGAGATATTTACTGAGGGCGTACAAGGATGAAGAGTGGGAGAGCTCACCAGATTTC------CGTGACCGGTTTTCTGCCAATTTGGACAAAGTCAAAAACGTGGTCCCTTTGAGAATTAATGAAACCCGTCTGTCTGACTCAGCCATCTATTACTGCGCAC-----------CAAATACT---------------------------------GGAGGCAATGACAAGCTTATATTTGGAAGTGGGACCAAGGTGACTG…
aV3.1J_T21_100710	GATCCAGTTTCCCAGAGCCCACCTCAGTTACCGGTTGAGGAA---GGACAAACTGTAATGTTGAACTGTAGTTACAAA---ACGTCGGGT------GCTGCTTCTCTCTTCTGGTACGTCCAATATCCTGGGGAAGCTCCGAGATATTTACTGAGGGCGTACAAGGATGAAGAGTGGGAGAGCTCACCAGATTTC------CGTGACCGGTTTTCTGCCAATTTGGACAAAGTCAAAAACGTGGTCCCTTTGAGAATTAATGAAACCCGTCTGTCTGACTCAGCCATCTATTACTGCGCACTGAG-------TCTAGTTTCT-------------------------------GGAGGCAATGACAAGCTTATATTTGGAAGTGGGACCAAGGTGACTG…
aV3.1J_V24_102810	GATCCAGTTTCCCAGAGCCCACCTCAGTTACCGGTTGAGGAA---GGACAAACTGTAATGTTGAACTGTAGTTACAAA---ACGTCGGGT------GCTGCTTCTCTCTTCTGGTACGTCCAATATCCTGGGGAAGCTCCGAGATATTTACTGAGGGCGTACAAGGATGAAGAGTGGGAGAGCTCACCAGATTTC------CGTGACCGGTTTTCTGCCAATTTGGACAAAGTCAAAAACGTGGTCCCTTTGAGAATTAATGAAACCCGTCTGTCTGACTCAGCCATCTATTACTGCGCACTGAG-------TCTAGTTTCT-------------------------------GGAGGCAATGACAAGCTTATATTTGGAAGTGGGACCAAGGTGACTG…
aV3.1B_A_419.29	GATCCAGTTTCCCAGAGCCCACCTCAGTTACCGGTTGAGGAA---GGACAAACTGTAATGTTGAACTGTAGTTACAAA---ACGTCGGGT------GCTGCTACTCTCTTCTGGTACGTCCAATATCCTGGGGAAGCTCCGAGATATTTATTGAGGGCGTACAAGGATGAAGAGTGGGAGAGCTCACCAGATTTC------CGTGACGGGTTTTCTGCCAATTTGGACAAAGTCAAAAACGTGGTCCCTTTGAGAATTAATGAAACCCGTCTGTCTGACTCAGCCATCTATTACTGCGCA------------CCGTCC--------------------------------------TATGGCAACACTCTCTTATTCGCTTCTGGGACCAGGCTGACCG…
aV3.1J_V24_110210	GATCCAGTTTCCCAGAGGCCACCTCAGTTACCTGTTGAAGAA---GGACAAACTGTAATGTTAAACTCCGGTGACAAA---ACGTCGGGT------GGTGCNACTCTCTTCTGGTACGTCCAATATAGTGGGCCAGTTCCGAGATATTTACTGAGGGCGTACAAGGATGAAGAGAGGAAGATCTCACCAGATTTC------CGTGACCGGTTTTCTGCCAATTTGGACAAAGTCAAAAAAGTGGTCCCTTTGAGAATTAATGAAACCCGTCTGTCTGACTCAGCCATCTATTACTGCGCACTGAGA------TCGAGGGGGCGTACACCANN-----------------------------------ATCCTCCACTTGGAAATGGGACAAGGTTATTG…
aV3.1J_V16_090110	GATCCAGTCTCCCAGAGTACACCTCAGTTATCAGTTGAGGAA---GGACAAACTGGAATGTTGAACTGTAGTTACAAA---ACTACGGGT------GCGCCTAACATCTTCTGGTACGTCCAATATCCTGGCCAACCTCCGAAATATTTATTGAGGGCGTACAAGGATGAAGAGAAGAAGAACTCACCAGAGTTC------GCTGAGAGGTTTTCTGCCACCTTGGACAAAGTCAAAAAAGTGGTCCCTTTGAGAATTAATGAAACCCGTCTGTCTGACTCAGGCATCTATTATTGTGTAC-----------TTCGGGCAGGCTACTCC------------------------------------AAAGAGACCTTTGGAGGTGGGACGACGCTGACAG…
aV3.1B_A_419.4	GATCCAGTTTCCCAGAGCCCACCTCAGTTACCGGTTGAGGAA---GGACAAACTGTAATGTTGAACTGTAGTTACAAA---ACGTCGGGT------GCTGCTACTCTCTTCTGGTACGTCCAATATCCTGGGGAAGCTCCGAGATATTTACTGAGGGCGTACAAGGATGAAGAGAGGAAGAGCTCACCAGATTTC------CGTGACCGGTTTTCTGCCAATTTGGACAAAGTCAAAAAAGTGGTCCCTTTGAGAATTAATGAAACCCGTCTGTCTGACTCAGCCATCTATTACTGCGCACTGAG-------TCCCCTAAGGGGCGGTTACACCAAT-------------------------------CTTCTGTTTGGAAATGGGACAAGGTTAACTG…
aV3.1J_V06_110210	GACGCAGTTTCCCAGAGTCCACCTCAGTTACCGGTTGAAGAA---GGACAAAGTGTAATGTTGAACTGTAGTTACTAC---TCGTCGAGT------ACTGCAACTCTCTTCTGGTACATCCAATATCCTGGGGAACCTCCGACCTATTTACTGAGGGCGTACAAGGAGCGAGAGAGGAAGAACTCACCAGATTTCCGTTTCCGTGACCGGTTTTCTGCCGATTTGGACAAAGTCAAAAAAGTGGTCCCTTTGAGAATTAATGAAACCCGTCTGTCTGACTCAGCCATGTATTACTGTGCACTG---------GTCCGGGCTGGACTATCT--------------------------------TCTAAGATTATCTTTGGAGAGGGGACAAAGTTAAGTG…
aV3.1J_V21_110210	GATTCAGTTTCCCAGAGTCCACCTCAGTTACTGGTTGAGGAA---GGACAAGCTTTAACCTTGAACTGTAGTTACAAA---ATGTCGGGT------CCTGTTAATCTCTTCTGGTATGTCCAATATCCTGGAGAAGGTCCGAGATATATCCTGAGGGCGTACAAGGATCTCGAGAGGAAGAGTTCACCAGATTTC------CGTGACCGGTTTTCTGCCAATTTGGACAAAGTCAAAAAAGTAGTCCCTTTGAGAATTAATGAAACCCGTCTGTCTGACTCAGCCATGTATTACTGCACA------------ATGAGGACTGGAGCTTTT--------------------------------TACAAGCTTACCTTTGGACAGGGTACAAAGTTAAGCG…
aV3.1J_V15_102810	GATTCAGTTTCCCAGAGCCCACCTCAGTTACCGGTTGAGGAA---GGACAAACTGTAACGTTGAACTGTAGTTACAAA---ACGTCGGGT------GCTGCTACTCTCTTCTGGTACGTCCAATATCCTGGGGAAGCTCCGAGATATTTACTGAGGGCGTACAAGGATCAAGAGAGGAAGAGCTCACCAGATTTC------CGTGACCGGTTTTCTGCCAATTTGGACAAAGTCAAAAAAGTGGTCCCTTTGAGAATTAATGAAACCCGTCTGTCTGACTCAGCCATCTATTACTGCGCACTGAG-------GACCTCTGGACTAGCTTCT----------------------------------AAACTTATCTTTGGAGAGGGGACAAACTTAACTG…
aV3.1m_T31_051410	GATCCAGTTTCCCAGAGCCCACCTCAGTTACCGGTTGAGGAA---GGACAAACTGTAATGTTGAACTGTAGTTACAAA---ACGTCGGGT------GCTGCTACTCTCTTCTGGTACGTCCAATATCCTGGGGAAGCTCCGAGATATTTACTGAGGGCGTACAAGGATGAAGAGAGGAAGAGCTCACCAGATTTC------CGTGACCGGTTTTCTGCCAATTTGGACAAAGTCAAAAAAGTGGTCCCTTTGAGAATTAATGAAACCCGTCTGTCTGACTCAGCCATCTATTACTGCGCACTG---------TGTACT-----------------------------------GGAGGCAATGACAAGCTTATATTTGGAAGTGGGACCAAGGTGACTG…
aV4.1m_T07_061812	---TCTGTTACTCAGTCAGTCTCCTCAGTTGTTCGGACGGAA---GGAGAGACGATGATGCTAAGCTGTACCTATGAT---ACTACATCAACTTCCTATACA---TTATACTGGTACCGGCAGCACCCAGGCACACAGCCCGAGTATATACTGTTGAGAAGTACCACTGGCTA---TGAGGATAAAGCAGATTTTGCC---AGAAATCGCTTCTTTGCGGAACTGCAGACATCGAATAAACTCACCAGTTTGACTGTCACTGGGTTACAACTGACCGACGCTGCTCTGTATTACTGTGCTT-----------CTGCG------------------------------------GGAACTGGTAATAAGCTTATCTTTGGAGAGGGGACAAAGTTAACCG…
aV4.1m_T03_061812	---TCTGTTACTCAGTCAGTCTCCTCAGTTGTTCGGACGGAA---GGAGAGACGATGATGCTAAGCTGTACCTATGAT---ACTACATCAACTTCCTATACA---TTATACTGGTACCGGCAGCACCCAGGCACACAGCCCGAGTATATACTGTTGAGAAGTACCACTGGCTA---TGAGGATAAAGCAGATTTTGCC---AGAAATCGCTTCTTTGCGGAACTGCAGACATCGAATAAACTCACCAGTTTGACTGTCACTGGGTTACAACTGACCGACGCTGCTCTGTATTACTGTGCTT-----------CTGCG------------------------------------GGAACTGGTAATAAGCTTATCTTTGGAGAGGGGACAAAGTTAACCG…
aV4.1m_T04_062512	---TCTGTTACTCAGTCAGTCTCCTCAGTTGTTCGGACGGAA---GGAGAGACGATGATGCTAAGCTGTACCTATGAT---ACTACATCAACTTCCGAGACA---TTATACTGGTACCGGCAGCACCCAGGCACACAGCCCGAGTATATACTGTTGAGAAGTACCACTGGCTA---TGAGGATAAAGCAGATTTTGCC---AGAAATCGCTTCTTTGCGGAACTGCAGACATCGAATAAACTCACCAGTTTGACTGTCACTGGGTTACAACTGACCGACGCTGCTCTGTATTACTGTGCTTTCAGGAA----CCCGGATATGAAC-------------------------TACGGAACTGGTAATAAGCTTATCTTTGGAGAGGGGACAAAGTTAACCG…
aV4.1m_T09_062512	---TCTGTTACTCAGTCAGTCTCCTCAGTTGTTCGGACGGAA---GGAGAGACGATGATGCTAAGCTGTACCTATGAT---ACTACATCAACTTCCGAGACA---TTATACTGGTACCGGCAGCACCCAGGCACACAGCCCGAGTATATACTGTTGAGAAGTACCACTGGCTA---TGAGGATAAAGCAGATTTTGCC---AGAAATCGCTTCTTTGCGGAACTGCAGACATCGAATAAACTCACCAGTTTGACTGTCACTGGGTTACAACTGACCGACGCTGCTCTGTATTACTGTGCTTTCAGGAA----CCCGGATATGAAC-------------------------TACGGAACTGGTAATAAGCTTATCTTTGGAGAGGGGACAAAGTTAACCG…
aV4.1J_V10_110210	---TCTGTTACTCAGTCAGTCTCCTCAGTTGTTCGGACGGAA---GGAGAGACGATGATGCTAAGATGTACCTATGAT---ACCACATCAACGACCTATACA---TTATACTGGTACCGGCAGCACCCAGGGACACAGCCCGAGTATATACTATTGAGAAGTAGCCCTGGCTA---TGAGGATAAAGCAGATTTTGCC---AGAAATCGCTTCTTTGCGGAACTGCAGACATCGAATAAACTCACCAGTTTGACTGTCACTGGGTTACAATTGACCGACGCTGCTCTGTATTATTGTGCTTTCTGGAAA---CCTAGTGGTT-----------------------------------------ACAACCTTATCTTTGGAGGTGGGACCAGACTGACAG…
aV4.1J_V14_090110	---TCTGTTACTCAGTCAGTCTCCTCAGTTGTTCGGACGGAA---GGAGAGACGATGATGCTAAGATGTACCTATGAT---ACCACATCAACTTCCTATACA---TTATACTGGTACCGGCAGCACCCAGGGACACAGCCCGACTATATACTGTTGAGAAGTAGCCCTGGCTA---TGAGGATATCGCAGATTTTGCC---AAAAATCGATTCTTTGCGGAACTGCAGACATCGAATAAAGATACCAATTTGACTGTCACTGGGTTACAAATGACCGACGCTGCTCTGTATTATTGTGCTTTCTGGAAA---CCTAGTGGTT-----------------------------------------ACAACCTTATCTTTGGAGGTGGGACCAGACTGACAG…
aV4.1J_V23_110210	---TCTGTTACTCAGTCAGTCTCCTCAGTTGTTCGGACGGAA---GGAGAGACGATGATGCTAAACTGTACTTATAAT---ACCACATCAAGGTCCTCTACC---TTATACTGGTATCGGCTGCACCCAGGCACACAGCCCGAGTATATACTGTACAGAAGTACCGCTGGCTA---TAAAGATACCGCAGATTTTGCC---AGAAATCGATTCTTTGCGGAACTGGAGACTTCGAATAAACTCACCAGTTTGACTGTCAGCGGGTTACAATTCACCGACACTGCTCTGTATTACTGCGCGATCTGGAAA---CCTAGTGGTTAC-----------------------------------------AGTCTTATCTTTGGAGGTGGGACCAGACTGACAG…
aV4.1J_V01_102810	---TCTGTTACTCAGTCAGTCTCCTCAGTTGTTCGGACGGAA---GGAGAGACGATGATACTAAACTGTACCTATGAT---ACCACATCCAGATCCTGTACA---TTATACTGGTATCGGCTGCACCCAGGCACAAGGCCCGAGTATATACTGTACAGAAGTACCCCTGGCTA---TGAGGATACCGCAGATTTTGCC---AGACCACGCTTTTTTGCGGAACTGGATACATCGAATAAACTCACCAGTTTGACTGTCACTGGACTACAATTGACCGACACTGCTCTGTATTACTGTGCTTTTTGGAAA---CCTAGCGGCTAC-----------------------------------------AGTCTTATCTTTGGAGGTGGGACCAGACTGAGCG…
aV4.1m_T09_080212	---TCTGTTACTCAGTCAGTCTCCTCAGTTGTTCGTACGGAA---GGAGAGACGATGATGCTCAGCTGTACCTATGAT---ACTACATCAACTTCTGATAGA---TTATACTGGTACCGGCAGCACCCAGGCACACAGCCCGAGTATATACTGTTGAGAAGTACCACTGGCTA---TGAGGATGAAGCAGATTTTGCC---AAAAGTCGCTTCTCTGCAAAACTGCAGACATCGAATAAACTCACCAATTTGATTGTCACTGGGTTACAGCTGACCGACGCTGCTGTGTATTACTGTGC-------------AAAAGCCGGGCAT-------------------------AACAGCGGAGATAGAAGGTTGATCTTTGGCCGAGGGACCCAGTTAACGG…
aV4.1m_T11_071612	---TCTGTTACTCAGTCAGTCTCCTCAGTTGTTCGTACGGAA---GGAGAGACGATGATGCTCAGCTGTACCTATGAT---ACTACATCAACTTCTGATAGA---TTATACTGGTACCGGCAGCACCCAGGCACACAGCCCGAGTATATACTGTTGAGAAGTACCACTGGCTA---TGAGGATGAAGCAGATTTTGCC---AAAAGTCGCTTCTCTGCAAAACTGCAGACATCGAATAAACTCACCAATTTGATTGTCACTGGGTTACAGCTGACCGACGCTGCTGTGTATTACTGTGC-------------AAAAGCCGGGCAT-------------------------AACAGCGGAGATAGAAGGTTGATCTTTGGCCGAGGGACCCAGTTAACGG…
aV4.1m_T02_070612	---TCTGTTACTCAGTCAGTCTCCTCAGTTGTTCGTACGGAA---GGAGAGACGATGATGCTCAGCTGTACCTATGAT---ACTACATCAACTTCTGATAGA---TTATACTGGTACCGGCAGCACCCAGGCACACAGCCCGAGTATATACTGTTGAGAAGTACCACTGGCTA---TGAGGATGAAGCAGATTTTGCC---AAAAGTCGCTTCTCTGCAAAACTGCAGACATCGAATAAACTCACCAATTTGATTGTCACTGGGTTACAGCTGACCGACGCTGCTGTGTATTACTGTGC-------------AAAAGCCGGGCAT-------------------------AACAGCGGAGATAGAAGGTTGATCTTTGGCCGAGGGACCCAGTTAACGG…
aV4.1m_T24_071612	---TCTGTCACTCAGTTATTCTCCTCAGAAGTTCGGACAGAA---GGAGACGTGGTTACTCTAAGTTGTACCTATGAA---GCTACAGTGAGCTACTATACA---CTCTTCTGGTACCGACAGCAACCAGACACACGTCCTGACTTTATTATGCTCAAAGATACTGGTGGTTC---TAATGATAAAGCAAATTTTGCA---CAAGATCGTTTCTCTATGGAACTTCAGACCTCGAAGAAATTCACAAGTTTGACTATAACTGGGCTGCAGCTGACTGACGCTGCCGTGTACTACTGCGCATTCAGG------CTCCAATGCCCG-----------------------------TATGATGGCTACAAGCTTATCTTTGGAGGTGGGACCAGACTGACAG…
aV4.1m_T02_072612	---TCTGTCACTCAGTTATTCTCCTCAGAAGTTCGGACAGAA---GGAGACGTGGTTACTCTAAGTTGTACCTATGAA---GCTACAGTGAGCTACTATACA---CTCTTCTGGTACCGACAGCAACCAGACACACGTCCTGACTTTATTATGCTCAAAGATACTGGTGGTTC---TAATGATAAAGCAAATTTTGCA---CAAGATCGTTTCTCTATGGAACTTCAGACCTCGAAGAAATTCACAAGTTTGACTATAACTGGGCTGCAGCTGACTGACGCTGCCGTGTACTACTGCGCATTCAGG------CTCCAATGCCCG-----------------------------TATGATGGCTACAAGCTTATCTTTGGAGGTGGGACCAGACTGACAG…
aV4.1m_T06_071212	---TCTGTCACTCAGTTATTCTCCTCAGAAGTTCGGACAGAA---GGAGACGTGGTTACTCTAAGTTGTACCTATGAA---GCTACAGTGAGCTACTATACA---CTCTTCTGGTACCGACAGCAACCAGACACACGTCCTGACTTTATTATGCTCAAAGATACTGGTGGTTC---TAATGATAAAGCAAATTTTGCA---CAAGATCGTTTCTCTATGGAACTTCAGACCTCGAAGAAATTCACAAGTTTGACTATAACTGGGCTGCAGCTGACTGACGCTGCCGTGTACTACTGCGCATTCAGG------CTCCAATGCCCG-----------------------------TATGATGGCTACAAGCTTATCTTTGGAGGTGGGACCAGACTGACAG…
aV4.1m_T09_061812	---TCTGTTACTCAGTCAGTCTCCTCAGTTGTTCGGACGGAA---GGAGAGACGATGATGCTAAGCTGTACCTATGAT---ACTACATCAACTTCCTATACA---TTATACTGGTACCGGCAGCACCCAGGCACACAGCCCGAGTATATACTGTTGAGAAGTACCACTGGCTA---TGAGGATAAAGCAGATTTTGCC---AGAAATCGCTTCTTTGCGGAACTGCAGACATCGAATAAACTCACCAGTTTGACTGTCACTGGGTTACAACTGACCGACGCTGCTCTGTATTACTGTGCTTTCAGGAA----CACGCGG----------------------------------GCTGGTAACAACCCGCTTGTCTTTGGAGGTGGGACCAGACTGATCG…
aV4.1m_T13_070612	---------------------------------------------------------------------------ACA---CTGACATGGACTGTAGAAACA---TTATACTGGTACCGGCAGCACCCAGGCACACAGCCCGAGTATATACTGTTGAGAAGTACCACTGGCTA---TGAGGATAAAGCAGATTTTGCC---AGAAATCGCTTCTTTGCGGAACTGCAGACATCGAATAAACTCACCAGTTTGACTGTCACTGGGTTACAACTGACCGACGCTGCTCTGTATTACTGTGCTTTCTGGAA----CCCGGATCGGGG-------------------------------------GGAGCCCTTGGTCTTTGGAGCTGGCGCCAAACTCACTG…
aV4.1m_T04_061812	---TCTGTTACTCAGTCAGTCTCCTCAGTTGTTCGGACGGAA---GGAGAGACGATGATGCTAAGCTGTACCTATGAT---ACCACATCAACTTCCTATACA---TTATACTGGTACCGGCAGCACCCAGGCACACAGCCCGAGTATATACTGTTGAGAAGTACCACTGGCTA---TGAGGATAAAGCAGATTTTGCC---AGAAATCGCTTCTTTGCGGAACTGCAGACATCGAATAAACTCACCAGTTTGACTGTTACTGGGTTACAACTGACCGACGCTGCTCTGTATTACTGTGCTTTCTGGAA----CCGGACGCCG----------------------------AATACTAACAACTACAAGTTTATCTTTGGAGCGGGGACCAGACTGACAG…
aV4.1m_T12_071612	---TCTGTTACTCAGTCAGTCTCCTCAGTTGTTCGGACAGAA---GGAGAGACGATGATGCTAAGCTGTACCTATGAT---ACTACATTAACTTCCTATAGA---TTATACTGGTACCGGCAGCACCCAGGCACACAGCCCGAGTATATACTGTTGAGAAGTGCCAATGGCTA---TGAGGATAAAGCAGATTTTGCC---AGAAATCGCTTCTTTGCGGAACTGCAGACATCGAATAAACTCACCAGTTTGACTGTCACTGGGTTACAACTGACCGACGCTGCTCTGTATTACTGTGCTTTCAGGA-----CGG------------------------------------ACAGCGGAGATAGAAGGTTGATCTTTGGCCGAGGGACCCAGTTAACGG…
aV4.1J_V03_110210	---TCTGTTACTCAGTCAGTCTCCTCAGTTGTTCGTACGGAA---GGAGAGACGATGATGCTCAGCTGTACCTATGAT---ACTACATCAACTTCTGATAGA---TTATACTGGTACCGGCAGCACCCAGGCACACAGCCCGAGTATATACTGTTGAGAAGTACCACTGGCTA---TGAGGATGAGGCAGATTTTGCC---AAAAGTCGCTTCTCTGCAAAACTGCAGACATCGAATAAACTCACCAATTTGATTGTCACTGGGTTACAGCTGACCGACGCTGCTGTGTATTACTGTGCATTCAGGAA----CCCGGN-------------------------------------CGGAGATAGAAGGTTGATCTTTGGCCGAGGGACCCAGTTAACGG…
aV4.1B_A_419.33	---TCTGTTACTCAGTCAGTCTCCTCAGTTGTTCGTACGGAA---GGAGAGACGATGATGCTCAGCTGTACCTATGAT---ACTACATCAACTTCTGATAGA---TTATACTGGTACCGGCAGCACCCAGGCACACAGCCCGAGTATATACTGTTGAGAAGTACCACTGGCTA---TGAGGATGAAGCAGATTTTGCC---AAAAGTCGCTTCTCTGCAAAACTGCAGACATCGAATAAACTCACCAATTTGATTGTCACTGGGTTACAGCTGACCGACGCTGCTGTGTATTACTGTGCATTCAGGAA----CCCCCGTGCTGGAGCAGCTTCT-------------------------------AAGCTTATCTTTGGAGAGGGGACAAAGTTAACCG…
aV4.1m_T12_060612	---TCTGTTACTCAGACAGTCTCCTCAGTTGTTCGGACAGGA---GGAGAGACGATGATGCTAAGCTGTACCTATGAT---ACTACATCAAATTCCTATACA---TTATACTGGTACCGGCAGCACCCAGGCACACAGCCCGAGTATATAATGTTGAGAAGTACCACTGGCTA---TGAGGATGAAGCAGATTTTGCC---AGAAGTCGCTTCTCTGCAGAACTGCAGACCTCGAATAAATTCACCAATTTGACTGTCACTGGGTTACAGCTGACCGACTCTGCTGTCTATTACTGTGCTTTCAGGAA----GAACTAC----------------------------------GGAACTGGTACTAAGCTTATCTTTGGAGAGGGGACAAAGTTAAGTG…
aV4.1J_V11_101310	---TCTGTTACTCAGACAGTCTCCTCAGTTGTTCGGACAGGA---GGAGAGACGATGATGCTAAGTTGTACCTATGAT---ACTACATCAAATTCCTATACA---TTATACTGGTACCGGCAGCACCCAGGCACACAGCCCGAGTATACACTGTTGAGAAGTACAACTGGCTA---TGAGGATGAAGCAGATTTTGCC---AGAAGTCGCTTCTCTGCAGAACTGCAGAACTCGAATAAATTCACCAATTTGACTGTCACTGGGTTACAGATGACCGACTCTGCTGTCTATTACTGTGCTTTCAGGAA----CCTAATCTATGATGC----------------------------------CACCAAGCTTATCTTTGGAGAAGGGACCAGACTAACAG…
aV4.1m_T11_060612	---TCTGTTACTCAGACAGTCTCCTCAGTTGTTCGGACAGGA---GGAGAGACGATGATGCTAAGCTGTACCTATGAT---ACTACAACAAATTCCTATACA---TTATACTGGTACCGGCAGCACCCAGGCACACAGCCCGAGTATACACTGTTGAGAAGTACAACTGGCTA---TGAGGATGAAGCAGATTTTGCC---AGAAGACGCTTCTCTGCAGAACTGCAGACCTCGAATAAATTCACCAATTTGACTGTCACTGGGTTACAGCTGACCGACTCTGCTGTCTATTACTGTGCTTTCAGG------CCGCCC--------------------------------------GGCGTTGGCAAGCTTATCTTTGGAGGTGGGACCAGACTGACAG…
aV4.1m_T24_080912	AATTCTGTCACTCAGTCGCTGTCCTCAGATGTTCGGACAGAA---GGAGACGTGGTAACTATAAGCTGTACCTATGAG---ACTACATGGAACTACCATGTA---TTATACTGGTACCGGCGGCACTCAGACACACAGCCCGAGTATATACTGTGGAAAAATAGCAATGCCAA---TGAGGATAAAGCAGATTTCGCT---AAAAGTCGTTTCTCTGCAGAACTTCAGACTTGGAAGAAATTTACCAGTTTGACTATCACTCGGCTGGAATTGACTGACACTGCTGTGTATTACTGCGCT------------CTCAACCCCCCG--------------------------GCTGGAACTGGTGTTAAGCTTACCTTTGGAGAGGGGACAAAGTTAACCG…
aV4.1J_T14_100710	AATTCTGTCACTCAGTCGCTGTCCTCAGATGTTCGGACAGAA---GGAGACGTGGTAACTATAAGCTGTACCTATGAG---ACTACATGGAACTACCATGTA---TTATACTGGTACCGGCGGCACTCAGACACACAGCCCGAGTATATACTGTGGAAAAATAGCAATGCCAA---TGAGGATAAAGCAGATTTCGCT---AAAAGTCGTTTCTCTGCAGAACTTCAGACTTGGAAGAAATTTACCAGTTTGACTATCACTCGGCTGGAATTGACTGACACTGCTGTGTATTACTGCGCT------------CTCAC--------------------------------------TGATGGCTACAAGCTTATCTTTGGAGGTGGGACCAGACTGACAG…
aV4.1J_V12_091410	---TCTGTCACTCAGTTATTCTCCTCAGAAGTTCGGACAGAA---GGAGACGTGGTTACTCTAAGTTGTACCTATGAA---GCTACAGTGAGCTACTATACA---CTCTTCTGGTACCGACAGCAACCAGACACACGTCCTGACTTTATTATGCTCAAAGATACTGGTGGTTC---TAATGATAAAGCAAATTTTGCA---CAAGATCGTTTCTCTATGGAACTTCAGACCTCGAAGAAATTCACAAGTTTGACTATAACTGGGCTGCAGCTGACTGACGCTGCCGTGTACTACTGCGCATTC---------TCG--------------------------------------GAAGCTGGTTACAAGCTAATCTTTGGAGAGGGGACAAGGTTAACCG…
aV4.1J_T10_100710	---TCTGTCATTCAGTCACTTTCCTCAGATATTCATCCAGAA---GGCGAGGTGGTGACTCTAAATTGTACCTATGAT---ACAACATTGAGCTCCTACAGC---TTATATTGGTACCGACAATGTCAAGGCACACAGCCTGAATATATATTGAGGAAAATTACTACTGGTAA---TGAGAATAAAGCAGATTTTGCT---AAAAGTCGCTTCTCTGCAGAACTTCAGATCTCGAAGAAATTCACCAGTTTGACTATCACTGGGATCCATCTGACTGACACTGCTGTGTATTACTGCGCG------------CTTGGGGAT-----------------------------GCTGGAGGGTTTAATAAGCTTATCTTTGGAGAGGGGACAAAGTTAACCG…
aV4.1B_A_419.24	GATTCTGCCACTCAGTCACCTTCCTCATATGTTCAGAAAGAA---GGAAAGACTGTGGTTCAAAACTGCACCTATGAT---ACTACATTGAGCGATTATACA---TTATACTGGTACAGTCAGCACCCAGACACACGGCCCGAGTTTATTCTGTGGCAAGATACTGATGGTGA---TGATGGTAAAGCAAGTTTTGTG---CAAGATCGTTTCTCTATGCGACTTGAGACCTCGAAAAAATCGACGAGTTTGACTATCGCTGGACTACAGCTGACTGACACTGCCGTGTATTACTGCGTTTTT---------GGTGACTCGANN-----------------------ACAGGGAGTGCATCAACACCACTGAAGTTC----------------------…
aV5.1m_T08_072712	GATTCAGTTTCCCCGGAATCACTTGAGCAAACGGTTCAGGTA---GGAGCTGATGTAAGCCTGAACTGCATTTACCAA---ACAACG---TATGCTGCTCCGACTCTCTTCTGGTACGTCCAGTATCCAGGGGAACCTCCGAGATATTTATTGAAGATATTCAACAAGGAACAGGGAGACAAGTCTCAAGAATTC------TCCAACAGGTTTTCTGCTATTTTGGACAACGAAAAGAAGATAGTTACATTAAAAATAGCAGCTGTTTCTCCCTCTGACTCTGCTGTCTATCACTGTGCAC-----------AGATTAAGAAN----------------------------------------------------------------------------…
aV5.1m_T06_072712	GATTCAGTTTCCCCGGAATCACTTGAGCAAACGGTTCAGGTA---GGAGCTGATGTAAGCCTGAACTGCATTTACCAA---ACAACG---TATGCTGCTCCGACTCTCTTCTGGTACGTCCAGTATCCAGGGGAACCTCCGAGATATTTATTGAAGATATTCAACAAGGAACAGGGAGACAAGTCTCAAGAATTC------TCCAACAGGTTTTCTGCTATTTTGGACAACGAAAAGAAGATAGTTACATTAAAAATAGCAGCTGTTTCTCCCTCTGACTCTGCTGTCTATCACTGTGCAC-----------AGATTAAGAAN----------------------------------------------------------------------------…
aV5.1m_T15_072712	GATTCAGTTTCCCCGGAATCACTTGAGCAAACGGTTCAGGTA---GGAGCTGATGTAAGCCTGAACTGCATTTACCAA---ACAACG---TATGCTGCTCCGACTCTCTTCTGGTACGTCCAGTATCCAGGGGAACCTCCGAGATATTTATTGAAGATATTCAACAAGGAACAGGGAGACAAGTCTCAAGAATTC------TCCAACAGGTTTTCTGCTATTTTGGACAACGAAAAGAAGATAGTTACATTAAAAATAGCAGCTGTTTCTCCCTCTGACTCTGCTGTCTATCACTGTGCAC-----------AGATTAAGAAN----------------------------------------------------------------------------…
aV5.1m_T20_072712	GATTCAGTTTCCCCGGAATCACTTGAGCAAACGGTTCAGGTA---GGAGCTGATGTAAGCCTGAACTGCATTTACCAA---ACAACG---TATGCTGCTCCGACTCTCTTCTGGTACGTCCAGTATCCAGGGGAACCTCCGAGATATTTATTGAAGATATTCAACAAGGAACAGGGAGACAAGTCTCAAGAATTC------TCCAACAGGTTTTCTGCTATTTTGGACAACGAAAAGAAGATAGTTACATTAAAAATAGCAGCTGTTTCTCCCTCTGACTCTGCTGTCTATCACTGTGCAC-----------AGATTAAGAAN----------------------------------------------------------------------------…
aV5.1m_T02_072712	GATTCAGTTTCCCCGGAATCACTTGAGCAAACGGTTCAGGTA---GGAGCTGATGTAAGCCTGAACTGCATTTACCAA---ACAACG---TATGCTGCTCCGACTCTCTTCTGGTACGTCCAGTATCCAGGGGAACCTCCGAGATATTTATTGAAGATATTCAACAAGGAACAGGGAGACAAGTCTCAAGAATTC------TCCAACAGGTTTTCTGCTATTTTGGACAACGAAAAGAAGATAGTTACATTAAAAATAGCAGCTGTTTCTCCCTCTGACTCTGCTGTCTATCACTGTGCAC-----------AGATTAAGAAN----------------------------------------------------------------------------…
aV5.1m_T11_072712	GATTCAGTTTCCCCGGAATCACTTGAGCAAACGGTTCAGGTA---GGAGCTGATGTAAGCCTGAACTGCATTTACCAA---ACAACG---TATGCTGCTCCGACTCTCTTCTGGTACGTCCAGTATCCAGGGGAACCTCCGAGATATTTATTGAAGATATTCAACAAGGAACAGGGAGACAAGTCTCAAGAATTC------TCCAACAGGTTTTCTGCTATTTTGGACAACGAAAAGAAGATAGTTACATTAAAAATAGCAGCTGTTTCTCCCTCTGACTCTGCTGTCTATCACTGTGCAC-----------AGATTAAGAAN----------------------------------------------------------------------------…
aV5.1m_T04_072712	GATTCAGTTTCCCCGGAATCACTTGAGCAAACGGTTCAGGTA---GGAGCTGATGTAAGCCTGAACTGCATTTACCAA---ACAACG---TATGCTGCTCCGACTCTCTTCTGGTACGTCCAGTATCCAGGGGAACCTCCGAGATATTTATTGAAGATATTCAACAAGGAACAGGGAGACAAGTCTCAAGAATTC------TCCAACAGGTTTTCTGCTATTTTGGACAACGAAAAGAAGATAGTTACATTAAAAATAGCAGCTGTTTCTCCCTCTGACTCTGCTGTCTATCACTGTGCAC-----------AGATTAAGAAN----------------------------------------------------------------------------…
aV5.1m_T23_072712	GATTCAGTTTCCCCGGAATCACTTGAGCAAACGGTTCAGGTA---GGAGCTGATGTAAGCCTGAACTGCATTTACCAA---ACAACG---TATGCTGCTCCGACTCTCTTCTGGTACGTCCAGTATCCAGGGGAACCTCCGAGATATTTATTGAAGATATTCAACAAGGAACAGGGAGACAAGTCTCAAGAATTC------TCCAACAGGTTTTCTGCTATTTTGGACAACGAAAAGAAGATAGTTACATTAAAAATAGCAGCTGTTTCTCCCTCTGACTCTGCTGTCTATCACTGTGCAC-----------AGATTAAGAAN----------------------------------------------------------------------------…
aV5.1m_T16_080912	GATTCAGTTTCCCCGGAATCACTTGAGCAAACGGTTCAGGTA---GGAGCTGATGTAAGCCTGAACTGCATTTACCAA---ACAACG---TATGCTGCTCCGACTCTCTTCTGGTACGTCCAGTATCCAGGGGAACCTCCGAGATATTTATTGAAGATATTCAACAAGGAACAGGGAGACAAGTCTCAAGAATTC------TCCAACAGGTTTTCTGCTATTTTGGACAACGAAAAGAAGATAGTTACATTAAAAATAGCAGCTGTTTCTCCCTCTGACTCTGCTGTCTATCACTGTGCAC-----------AGATTAAGAAN----------------------------------------------------------------------------…
aV5.1m_T17_072712	GATTCAGTTTCCCCGGAATCACTTGAGCAAACGGTTCAGGTA---GGAGCTGATGTAAGCCTGAACTGCATTTACCAA---ACAACG---TATGCTGCTCCGACTCTCTTCTGGTACGTCCAGTATCCAGGGGAACCTCCGAGATATTTATTGAAGATATTCAACAAGGAACAGGGAGACAAGTCTCAAGAATTC------TCCAACAGGTTTTCTGCTATTTTGGACAACGAAAAGAAGATAGTTACATTAAAAATAGCAGCTGTTTCTCCCTCTGACTCTGCTGTCTATCACTGTGCAC-----------AGATTAAGAAN----------------------------------------------------------------------------…
aV5.1m_T03_072712	GATTCAGTTTCCCCGGAATCACTTGAGCAAACGGTTCAGGTA---GGAGCTGATGTAAGCCTGAACTGCATTTACCAA---ACAACG---TATGCTGCTCCGACTCTCTTCTGGTACGTCCAGTATCCAGGGGAACCTCCGAGATATTTATTGAAGATATTCAACAAGGAACAGGGAGACAAGTCTCAAGAATTC------TCCAACAGGTTTTCTGCTATTTTGGACAACGAAAAGAAGATAGTTACATTAAAAATAGCAGCTGTTTCTCCCTCTGACTCTGCTGTCTATCACTGTGCAC-----------AGATTAAGAAN----------------------------------------------------------------------------…
aV5.1m_T13_072712	GATTCAGTTTCCCCGGAATCACTTGAGCAAACGGTTCAGGTA---GGAGCTGATGTAAGCCTGAACTGCATTTACCAA---ACAACG---TATGCTGCTCCGACTCTCTTCTGGTACGTCCAGTATCCAGGGGAACCTCCGAGATATTTATTGAAGATATTCAACAAGGAACAGGGAGACAAGTCTCAAGAATTC------TCCAACAGGTTTTCTGCTATTTTGGACAACGAAAAGAAGATAGTTACATTAAAAATAGCAGCTGTTTCTCCCTCTGACTCTGCTGTCTATCACTGTGCAC-----------AGATTAAGAAN----------------------------------------------------------------------------…
aV5.1m_T19_072712	GATTCAGTTTCCCCGGAATCACTTGAGCAAACGGTTCAGGTA---GGAGCTGATGTAAGCCTGAACTGCATTTACCAA---ACAACG---TATGCTGCTCCGACTCTCTTCTGGTACGTCCAGTATCCAGGGGAACCTCCGAGATATTTATTGAAGATATTCAACAAGGAACAGGGAGACAAGTCTCAAGAATTC------TCCAACAGGTTTTCTGCTATTTTGGACAACGAAAAGAAGATAGTTACATTAAAAATAGCAGCTGTTTCTCCCTCTGACTCTGCTGTCTATCACTGTGCAC-----------AGATTAAGAAN----------------------------------------------------------------------------…
aV5.1m_T05_072712	GATTCAGTTTCCCCGGAATCACTTGAGCAAACGGTTCAGGTA---GGAGCTGATGTAAGCCTGAACTGCATTTACCAA---ACAACG---TATGCTGCTCCGACTCTCTTCTGGTACGTCCAGTATCCAGGGGAACCTCCGAGATATTTATTGAAGATATTCAACAAGGAACAGGGAGACAAGTCTCAAGAATTC------TCCAACAGGTTTTCTGCTATTTTGGACAACGAAAAGAAGATAGTTACATTAAAAATAGCAGCTGTTTCTCCCTCTGACTCTGCTGTCTATCACTGTGCAC-----------AGATTAAGAAN----------------------------------------------------------------------------…
aV5.1m_T14_072712	GATTCAGTTTCCCCGGAATCACTTGAGCAAACGGTTCAGGTA---GGAGCTGATGTAAGCCTGAACTGCATTTACCAA---ACAACG---TATGCTGCTCCGACTCTCTTCTGGTACGTCCAGTATCCAGGGGAACCTCCGAGATATTTATTGAAGATATTCAACAAGGAACAGGGAGACAAGTCTCAAGAATTC------TCCAACAGGTTTTCTGCTATTTTGGACAACGAAAAGAAGATAGTTACATTAAAAATAGCAGCTGTTTCTCCCTCTGACTCTGCTGTCTATCACTGTGCAC-----------AGATTAAGAAN----------------------------------------------------------------------------…
aV5.1m_T24_072712	GATTCAGTTTCCCCGGAATCACTTGAGCAAACGGTTCAGGTA---GGAGCTGATGTAAGCCTGAACTGCATTTACCAA---ACAACG---TATGCTGCTCCGACTCTCTTCTGGTACGTCCAGTATCCAGGGGAACCTCCGAGATATTTATTGAAGATATTCAACAAGGAACAGGGAGACAAGTCTCAAGAATTC------TCCAACAGGTTTTCTGCTATTTTGGACAACGAAAAGAAGATAGTTACATTAAAAATAGCAGCTGTTTCTCCCTCTGACTCTGCTGTCTATCACTGTGCAC-----------AGATTAAGAAN----------------------------------------------------------------------------…
aV5.1m_T10_072712	GATTCAGTTTCCCCGGAATCACTTGAGCAAACGGTTCAGGTA---GGAGCTGATGTAAGCCTGAACTGCATTTACCAA---ACAACG---TATGCTGCTCCGACTCTCTTCTGGTACGTCCAGTATCCAGGGGAACCTCCGAGATATTTATTGAAGATATTCAACAAGGAACAGGGAGACAAGTCTCAAGAATTC------TCCAACAGGTTTTCTGCTATTTTGGACAACGAAAAGAAGATAGTTACATTAAAAATAGCAGCTGTTTCTCCCTCTGACTCTGCTGTCTATCACTGTGCAC-----------AGATTAAGAAN----------------------------------------------------------------------------…
aV5.1m_T03_080212	GATTCAGTTTCCCCGGAATCACTTGAGCAAACGGTTCAGGTA---GGAGCTGATGTAAGCCTGAACTGCATTTACCAA---ACAACG---TATGCTGCTCCGACTCTCTTCTGGTACGTCCAGTATCCAGGGGAACCTCCGAGATATTTATTGAAGATATTCAACAAGGAACAGGGAGACAAGTCTCAAGAATTC------TCCAACAGGTTTTCTGCTATTTTGGACAACGAAAAGAAGATAGTTACATTAAAAATAGCAGCTGTTTCTCCCTCTGACTCTGCTGTCTATCACTGTGCAC-----------AGATTAAGAAN----------------------------------------------------------------------------…
aV5.1m_T07_072712	GATTCAGTTTCCCCGGAATCACTTGAGCAAACGGTTCAGGTA---GGAGCTGATGTAAGCCTGAACTGCATTTACCAA---ACAACG---TATGCTGCTCCGACTCTCTTCTGGTACGTCCAGTATCCAGGGGAACCTCCGAGATATTTATTGAAGATATTCAACAAGGAACAGGGAGACAAGTCTCAAGAATTC------TCCAACAGGTTTTCTGCTATTTTGGACAACGAAAAGAAGATAGTTACATTAAAAATAGCAGCTGTTTCTCCCTCTGACTCTGCTGTCTATCACTGTGCAC-----------AGATTAAGAAN----------------------------------------------------------------------------…
aV5.1m_T18_072712	GATTCAGTTTCCCCGGAATCACTTGAGCAAACGGTTCAGGTA---GGAGCTGATGTAAGCCTGAACTGCATTTACCAA---ACAACG---TATGCTGCTCCGACTCTCTTCTGGTACGTCCAGTATCCAGGGGAACCTCCGAGATATTTATTGAAGATATTCAACAAGGAACAGGGAGACAAGTCTCAAGAATTC------TCCAACAGGTTTTCTGCTATTTTGGACAACGAAAAGAAGATAGTTACATTAAAAATAGCAGCTGTTTCTCCCTCTGACTCTGCTGTCTATCACTGTGCAC-----------AGATTAAGAAN----------------------------------------------------------------------------…
aV5.1m_T21_072712	GATTCAGTTTCCCCGGAATCACTTGAGCAAACGGTTCAGGTA---GGAGCTGATGTAAGCCTGAACTGCATTTACCAA---ACAACG---TATGCTGCTCCGACTCTCTTCTGGTACGTCCAGTATCCAGGGGAACCTCCGAGATATTTATTGAAGATATTCAACAAGGAACAGGGAGACAAGTCTCAAGAATTC------TCCAACAGGTTTTCTGCTATTTTGGACAACGAAAAGAAGATAGTTACATTAAAAATAGCAGCTGTTTCTCCCTCTGACTCTGCTGTCTATCACTGTGCAC-----------AGATTAAGAAN----------------------------------------------------------------------------…
aV5.1m_T07_071212	GATTCAGTTTCCCCGGAATCACTTGAGCAAACGGTTCAGGTA---GGAGCTGATGTAAGCCTGAACTGCATTTACCAA---ACAACG---TATGCTGCTCCGACTCTCTTCTGGTACGTCCAGTATCCAGGGGAACCTCCGAGATATTTATTGAAGATATTCAACAAGGAACAGGGAGACAAGTCTCAAGAATTC------TTCAACAGGTTTTCTGCTATTTTGGACAACGAAAAGAAGATAGTTACATTAAAAATAGCAGCTGTTTCTCCCTCTGACTCTGCTGTCTATCACTGTGCACTAAG-------GGGGCTAGGG----------------------------------GGTGCCAACAGCCTTATCTTTGGAGGTGGGACCAGACTGATCG…
aV5.1m_T20_080912	GATTCAGTTTCCCCGGAATCACTTGAGCAAACGGTTCAGGTA---GGAGCTGATGTAAGCCTGAACTGCATTTACCAA---ACAACG---TATGCTGCTCCGACTCTCTTCTGGTACGTCCAGTATCCAGGGGAACCTCCGAGATATTTATTGAAGATATTCAACAAGGAACAGGGAGACAAGTCTCAAGAATTC------TTCAACAGGTTTTCTGCTATTTTGGACAACGAAAAGAAGATAGTTACATTAAAAATAGCAGCTGTTTCTCCCTCTGACTCTGCTGTCTATCACTGTGCACTAAG-------GGGGCTAGGG----------------------------------GGTGCCAACAGCCTTATCTTTGGAGGTGGGACCAGACTGATCG…
aV5.1J_T06_100410	GATTCAGTTTCCCCGGAATCACTTGAGCAAACGGTTCAGGTA---GGAGCTGATGTAAGCCTGAACTGCATTTACCAA---ACAACG---TATGCTGCTCCGACTCTCTTCTGGTACGTCCAGTATCCAGGGGAACCTCCGAGATATTTATTGAAGATATTCAACAAGGAACAGGGAGACAAGTCTCAAGAATTC------TTCAACAGGTTTTCTGCTATTTTGGACAACGAAAAGAAGATAGTTACATTAAAAATAGCAGCTGTTTCTCCCTCTGACTCTGCTGTCTATCACTGTGCACTAAG-------TTAT-------------------------------------GGAGGCAATGACAAGCTTATATTTGGAAGTGGGACCAAGGTGACTG…
aV5.1J_V20_091010	GATTCAATTTCACAACACCCTGCCAATTTGTGGATTCGTGAG---GGAGAGACGGCAATATTGAACTGCAGTTTTACA---GCAGAA---TACACTGGAGAAACTCTCTTCTGGTATATCCAACATCCTGGCAAATCTCCAAAATATATACTGAAGAGAGATGCCAAGATGCAAGAGGAGACATCTTCAGAGTTT------TCCAACCGCTTTAGTGCAAACTTGGACACAGACAAGAAAACAATTCCACTATATATTGTAAGGGCTCGTTTCTCTGACTCTGCCATCTATCTCTGCGCGCTG---------AGACGTGAT--------------------------------GAAGCTGGTTACAAGCTAATCTTTGGAGAGGGGACAAGGTTAACCG…
aV5.1J_V17_102810	GATTCAATTTCACAACACCCTAGCAAATTGTGGATTCGTGAC---GGAGAGACGGCAATGTTGAACTGCAGTTATACA---GCACAACACTATACTGGAGAAAGTCTCTTCTGGTATATCCAGTATCCTGGCAAATCTCCAAAATATATACTATCGAGATATGGCAAGGCGCAAGAGGAGACATCTTCAGAGTTT------TCCAACCGCTTTAGTGCAAACTTGGACACAGACAAGAAAACAATTCCACTATATATTGTAAGGGCTCGTTTCTCTGACTCTGGCATTTATTTCTGCGCGCTG---------AGACGTGAT--------------------------------GAAGCTGGTTACAAGCTAGTCTTTGGAGAGGGGACAAGGTTAACCG…
aV5.1J_T05_100410	GATTCAATTTCACAACACCCTAGCAAATTGTGGATTCGTGAC---GGAGAGACGGCAATATTGAACTGCAGTTATACA---GCAGAG---TACACTGGAGAAACTCTCTTCTGGTATATCCAGTATCCTGGCAAATCTCCAAAATATATACTGAAGAGATATGGCAAGGCGCAAGAGGAGACATCTTCAGAGTTT------TCCAACCGCTTTAGTGCAAACTTGGACACAGACAAGAAAACAATTCCACTATATATCGCAAGGGCTCGTTTCTCTGACTCTGCCATCTATCTCTGCGCGCTG---------NAATGGCGT-----------------------------GAGGGGGGTTACACCAATCTTCTGTTTGGAAATGGGACAAGGTTAACTG…
aV5.1J_T05_100710	GATTCAGTATCTCAGGATACGTCTGATTTAACAGCTCAGGAA---GGAGAGATTATCACACTGAGCTGCAATTATTCC---ACGACTGAT---ACTTTTCCTTACCTCTTCTGGTATATTCAATACCCAGGGAGTTCCCTGACATATGTATTGAAGAGATACGGCAATGATATGGGCGAGACTGCTCCAAATTTC------CGCAGCAGGTTCGCTGCTTTCTTGGACAACGAAAAAAGAATTGTTACATTGAGAGTCCTTGGGGTTCTTGTCTCTGACTCCGCCGTGTATCATTGTGCACTG---------CGCACTGGAGCAGTTCTT-----------------------------------AAGCTTATCTTTGGAGAGGGGACAAAGTTAACGG…
aV5.1J_V02_090110	GATTCAGTATCTCAGGATACGTCTGAACTAACAGCTCAGGAA---GGAGAGATTATCACACTGAGTTGCAATTATTCC---ACGACTGAT---ACTTTTCCCTACCTCTTCTGGTATATTCAATACCCAGGGAGTTCCCTGACATATGTATTGAAGAGATACGGCAATGATATGGGCGAGACTGTTCCAAATTTC------CGCAGCAGGTTCGCTGCTTTCTTGGACAACGAACGAAGAAGTATTACATTGAGAGTCCTTGGGGTTCTTGTGTCTGACTCCGCCGTGTATCATTGTGCACTG---------CGGTTGAATGCTGGAGGAAGTAAT-----------------------------AAGCTTATCTTTGGAGAGGGGACAAAGTTAACCG…
aV5.1J_T03_100410	GATTCAGTATCTCAGGATACGTCTGATTTAACAGCTCAGGAA---GGAGAGATTATCACACTGAGCTGCAATTATTCC---ACGACTGAT---ACTTTTCCTTACCTCTTCTGGTATATTCAATACCCAGGGAGTTCCCTGACATATGTATTGAAGAGATACGGCAATGATATGGGCGAGACTGCTCCAAATTTC------CGCAGCAGGTTCGCTGCTTTCTTGGACAACGAAAAAAGAATTGTTACATTGAGAGTCCTTGGGGTTCTTGTCTCTGACTCCGCCGTGTATCATTGTGCACT----------CCAGAGGCATACTGGAGCTTGGACT-------------------------------CTCATCTTTGGAAAGGGGACAAAGTTAACAG…
aV5.1B_A_419.36	GATTCAGTATCTCAGGATACGTCTGATTTAACAGCTCAGGAA---GGAGAGATTATCACACTGAGCTGCAATTATTCC---ACGACTGAT---ACTTTTCCTTACCTCTTCTGGTATATTCAATATCCAGGGAGTTCCCTGACATATGTATTGAAGAGATACGGCAATGATATGGGCGAGACTGCTCCAAATTTC------CGCAGCAGGTTCGCTGCTTTCTTGGACAACGAAAAAAGAATTGTTACATTGAGAGTCCTTGGGGTTCTTGTCTCTGACTCCGCCGTGTATCATTGTGCACTG---------CAC-----------------------------------GAGTATGATGGCTACAAGCTTATCTTTGGAGGTGGGACCAGACTGACAG…
aV5.1B_A_419.1	GATTCAGTATCTCAGGATACGTCTGATTTAACAGCTCAGGAA---GGAGAGATTATCACACTGAGCTGCAATTATTCC---ACGACTGAT---ACTTTTCCTTACCTCTTCTGGTATATTCAATACCCAGGGAGTTCCCTGACATATGTATTGAAGAGATACGGCAATGATATGGGCGAGACTGCTCCAAATTTC------CGCAGCAGGTTCGCTGCTTTCTTGGACAACGAAAAAAGAATTGTTACATTGAGAGTCCTTGGGGTTCTTGTCTCTGACTCCGCCGTGTATCATTGTGCACT----------CCCAACG-------------------------------------GGCACCAACAACCTTATCTTTGGAGGTGGGACCAGACTGATCG…
aV5.1J_V08_091410	GATTCAGTATCTCAGGATACGTCTGATTTAACAGCTCAGGAA---GGAGAGATTATCACACTGAGCTGCAATTATTCC---ACGACTGAT---ACTTTTCCTTACCTCTTCTGGTATATTCAATACCCAGGGAGTTCCCTGACATATGTATTGAAGAGATACGGCAATGATATGGGCGAGACTGCTCCAAATTTC------CGCAGCAGGTTCGCTGCTTTCTTGGACAACGAAAAAAGAATTGTTACATTGAGAGTCCTTGGGGTTCTTGTCTCTGACTCCGCCGTGTATCATTGTGCACTG---------CGTCCGGCTCCGCAC--------------------------GGAGCTGGTTACAAGCTTACCTTTGGACAGGGGACAAAGTTAACCG…
aV5.1J_T39_100410	GATTCAGTATCTCAGGATACGTCTGATTTAACAGCTCAGGAA---GGAGAGATTATCACACTGAGCTGCAATTATTCC---ACGACTGAT---ACTTTTCCTTACCTCTTCTGGTATATTCAATACCCAGGGAGTTCCCTGACATATGTATTGAAGAGATACGGCAATGATATGGGCGAGACTGCTCCAAATTTC------CGCAGCAGGTTCGCTGCTTTCTTGGACAACGAAAAAAGAATTGTTACATTGAGAGTCCTTGGGGTTCTTGTCTCTGACTCCGCCGTGTATCATTGTGCACTG---------CCCGAGCCCACCGAGAGA-----------------------------TACAACAAGCTAATGTTCGGATCTGGAACTAGGCTAACTG…
aV6.1m_T11_080912	GATTCTCTCACTCAGCAGGTGCCCTCACTCACACAGACGAAG---GGCGACGATGTCACTCTAAACTGTACTTACACT---GGTCGT---------CCTGTTTCCGTGTTCCGGTACCATCAGTATCCAGGAGGGCATCCCGACCTCGCAATCTGGAGGTACACGAGTAGTGCTGCTGAAATGAAGTCGGATTTCGCA---CAGACCTGGTTTTCTGATGCCCTGCAGCAGACAGACAAGTTCTATAAGTTAACTATCTCGGAGCCTA------CTGACACCTCGGTATATTGCTGTGCAAT----------GTCGAAT----------------------------------GCTGGTAACAACCCGCTTGTCTTTGGAGGTGGGACCAGACTGATCG…
aV6.1m_T17_072012	GATTCTCTCACTCAGCAGGTGCCCTCACTCACACAGACGAAG---GGCGACGATGTCACTCTAAACTGTACTTACACT---GGTCGT---------CCTGTTTCCGTGTTCCGGTACCATCAGTATCCAGGAGGGCATCCCGACCTCGCAATCTGGAGGTACACGAGTAGTGCTGCTGAAATGAAGTCGGATTTCGCA---CAGACCTGGTTTTCTGATGCCCTGCAGCAGACAGACAAGTTCTATAAGTTAACTATCTCGGAGCCTA------CTGACACCTCGGTATATTGCTGTGCAAT----------GTCGAAT----------------------------------GCTGGTAACAACCCGCTTGTCTTTGGAGGTGGGACCAGACTGATCG…
aV6.1m_T01_080912	GATTCTCTCACTCAGCAGGTGCCCTCACTCACACAGACGAAG---GGCGACGATGTCACTCTAAACTGTACTTACACT---GGTCGT---------CCTGTTTCCGTGTTCCGGTACCATCAGTATCCAGGAGGGCATCCCGACCTCGCAATCTGGAGGTACACGAGTAGTGCTGCTGAAATGAAGTCGGATTTCGCA---CAGACCTGGTTTTCTGATGCCCTGCAGCAGACAGACAAGTTCTATAAGTTAACTATCTCGGAGCCTA------CTGACACCTCGGTATATTGCTGTGCAAT----------GTCGAAT----------------------------------GCTGGTAACAACCCGCTTGTCTTTGGAGGTGGGACCAGACTGATCG…
aV6.1B_A_419.32	------------------GATCTTTCGCTAAAGCAGATGGAG---GGAGGCAATATCACGTTAACCTGTACCTACACT---GACGAT---------GGTTATTACTTGTTCTGGTATCGTCAGTACCCAGACAGACAGCCAGAGTTCACAGTCCGGAGGCACACGACTGGCAGTGCTGAATTGAAGGCGGATTTTGCT---CGGACCCGGTTTTCTGATGTAGTACAGCAGAAAGACAAGTTGTATCAATTGACCATCTCAGACCTGCAATTGTCTGACACAATGGTCTATTACTGTGCAAT----------CAGCCTCCT----------------------------------------GGAGCCCTTGGTCTTTGGAGCTGGCGCCAAACTCACTG…
aV6.1m_T05_070912	GTTTCTGTTACTCAGCAGGATCTTTCGCTAAAGCAGATGGAG---GGAGGCAATATCACGTTAACCTGTACCTACACT---GACGAT---------GGTTATTACTTGTTCTGGTATCGTCAGTACCCAGACAGACAGCCAGAGTTCACAGTCCGGAGGCACACGACTGGCAGTGCTGAATTGAAGGCGGATTTTGCT---CGGACCCGGTTTTCTGATGTAGTACAGCAGAAAGACAAGTTGTATCAATTGACCATCTCAGACCTGCAATTGTCTGACACAATGGTCTATTACTGTGCAAT----------CAGCCCA-------------------------------AATACTAACAACTACAAGTTTATCTTTGGAGCGGGGACCAGACTGACAG…
aV6.1J_V11_090110	GTTTCTGTTACTCAGCAGGATCTTTCGCTAAAGCAGATGGAG---GGAGGCAATATCACGTTAACCTGTACCTACACT---GACGAT---------GGTTATTACTTGTTCTGGTATCGTCAGTACCCAGACAGACAGCCAGAGTTCACAGTCCGGAGGCACACGACTGGCAGTGCTGAATTGAAGGCGGATTTTGCT---CGGACCCGGTTTTCTGATGTAGTACAGCAGAAAGACAAGTTGTATCAATTGACCATCTCAGACCTGCAATTGTCTGACACAATGGTCTATTACTGTGC-------------CCGCGCGGCCGGGTTT-------------------------GATGGCACCAGGAAGCTTATCTTTGGAGATGGGACCAGACTGATCG…
aV6.1B_A_419.23	GTTTCTGTTACTCAGCAGGATCTTTCGCTAAAGCAGATGGAG---GGAGGCAATATCACGTTAACCTGTACCTACACT---GACGAT---------GGTTATTACTTGTTCTGGTATCGTCAGTACCCAGACAGACAGCCAGAGTTCACAGTCCGGAGGCACACGACTGGCAGTGCTGAATTGAAGGCGGATTTTGCT---CGGACCCGGTTTTCTGATGTAGTACAGCAGAAAGACAAGTTGTATCAATTGACCATCTCAGACCTGCAATTGTCTGACACAATGGTCTATTACTGTGCAAT----------CCGCCGGGGGTCT-------------------------------GATGGCTACAAGCTTATCTTTGGAGGTGGGACCAGACTGACAG…
aV6.1B_A_419.18	GTTTCTGTTACTCAGCAGGATCTTTCGCTAAAGCAGATGGAG---GGAGGCAATATCACGTTAACCTGTACCTACACT---GACGAT---------GGTTATTACTTGTTCTGGTATCGTCAGTACCCAGACAGACAGCCAGAGTTCACAGTCCGGAGGCACACGACTGGCAGTGCTGAATTGAAGGCGGATTTTGTT---CGGACCCGGTTTTCTGATGTAGTACAGCAGAAAGACAAGTTGTATCAATTGACCATCTCAGACCTGCAATTGTCTGACACAATGGTCTATTACTGTGCAAT----------CAGCCTGGCCGGT-------------------------------GCAAACAGCCCACTTGTCTTTGGAAATGGAACCAGACTAATAG…
aV6.1m_T11B_060712	GTTTCTGTTACTCAGCAGGATCTTTCGCTAAAGCAGATGGAG---GGAGGCAATATCACGTTAACCTGTACCTACACT---GACGAT---------GGTTATTACTTGTTCTGGTATCGTCAGTACCCAGACAGACAGCCAGAGTTCACAGTCCGGAGGCACACGACTGGCAGTGCTGAATTGAAGGCGGATTTTGCT---CGGACCCGGTTTTCTGATGTAGTACAGCAGAAAGACAAGTTGTATCAATTGACCATCTCAGACCTGCAATTGTCTGACACAATGGTCTATTACTGTGCAAT----------CAGCAGCCA----------------------------------------CAACAAGCTAATGTTCGGATCTGGAACTAGGCTAACTG…
aV7.1m_T31_052410	GTTTCTGTTACTCACCGGACGCCCTCTCTCATGCAAACAGAG---GGATTAGATGTCAATTTACACTGCACGTACAAC---GGTTAT---------GTTTATGATTTATTCTGGTATCGCCAGTACCCTGGCAGAAAGCCCGAGTTCGCAGTCCGGACTTCCGAGAGTAGCGGTGCTGAATTTAAGGCGGATTTTGCA---CAGGAGTGGTTTTCTAGTACAGTCCAGCAGTCAGACAAGTCGTACCGATTGACCATCTCGAAGCTGCTGCTGTCTGACACCGCTCTCTATTACTGTGCAGCGAG-------CCTATCGTAT-------------------------------GATGGCACCAACAACCTTATCTTTGGAGGTGGGACCAGACTGATCG…
aV7.1m_T32_052410	GTTTCTGTTACTCACCGGACGCCCTCTCTCATGCAAACAGAG---GGATTAGATGTCAATTTACACTGCACGTACAAC---GGTTAT---------GTTTATGATTTATTCTGGTATCGCCAGTACCCTGGCAGAAAGCCCGAGTTCGCAGTCCGGACTTCCGAGAGTAGCGGTGCTGAATTTAAGGCGGATTTTGCA---CAGGAGTGGTTTTCTAGTACAGTCCAGCAGTCAGACAAGTCGTACCGATTGACCATCTCGAAGCTGCTGCTGTCTGACACCGCTCTCTATTACTGTGCAGCGAG-------CCTATCCATC-------------------------------GATGGCACCAGGAAGCTTATCTTTGGAGATGGGACCAGACTGATCG…
aV7.1m_T14_071212	CTTTCTGTTACTCACCGGACGCCCTCTCTCATGCAAACAGAG---GGATTAGATGTCAATTTACACTGCACGTACAAC---GGTTAT---------GTTTATGATTTATTCTGGTATCGCCAGTACCCTGGCAGAAAGCCCGAGTTCGCAGTCCGGACTTCCGAGAGTAGCGGTGCTGAATTTAAGGCGGATTTTGCA---CAGGAGTGGTTTTCTAGTACAGTCCAGCAGTCAGACAAGTCGTACCGATTGACCATCTCGAAGCTGCTGCTGTCTGACACCGCTCTCTATTACTGTGCAGCGAG-------CCCCCGGGGGTNN-------------------------GCTGGAACTGGTGTTAAGCTTACCTTTGGAGAGGGGACAAAGTTAACCG…
aV7.1J_T13_100710	CTTTCTGTTACTCACCGGACGCCCTCTCTCATGCAAACAGAG---GGATTAGATGTCAATTTACACTGCACGTACAAC---GGTTAT---------GTTTATGATTTATTCTGGTATCGCCAGTACCCTGGCAGAAAGCCCGAGTTCGCAGTCCGGACTTCCGAGAGTAGCAGTGCTGAATTTAAGGCGGATTTTGCA---CAGGAGTGGTTTTCTAGTACAGTCCAGCAGTCAGACAAGTCGTACCGATTGACCATCTCGAAGCTGCTGCTGTCTGACACCGCTCTCTATTACTGTGCAGCG---------TGT-----------------------------------AACAGCGGAGACAGAAGGTTGATCTTTGGCCGAGGGACCCAGTTAACGG…
aV7.1J_V04_102810	GTTTCTGTGATTCAGGGGGAGACCTCGCTCACGCGGCGAGAA---AAGGAAAATGTCACTTTAACCTGCACATACACC---GATGAT---------GTTGATTACTTGTTCTGGTACCGCCAGCACCCTGGCAGAAAGACCGAGTTCGCGGTCCTTACGTACAAGAGCAACAGTGCTGAATCCAAGGCAGATTTTGCT---CAGAAGCGGTTTTCTAGCACAGTCCAGCAGTCACACAAGTCATATCGGTTGACCATAACGGTGCTGCAAGTGTCTGACACCGCTGTCTATTACTGTGCAG-----------TGAG---------------------------------AGACAGCGGAGATAGAATGTTGATCTTTGGCCGAGGGACCCAGTTAACGG…
aV7.1J_V14_102810	GTTTCTGTGACTCAGGGGGAGACCCCGCTGAACCAATTAGAG---AAGGAAAATGTCACTTTAACCTGCAAATACACC---GATGAT---------GTTGATTACTTGTTCTGGTACCGCCAGTACCCTGGCTTCAAGACCGAGTTCGCGGTCCTTACGTACAAGAGCATAAGTGCTGAATCCAATGCAGATTTTGCT---CAGAAGCGGTTTTCTAGCACAGTCCATGAGTCAGACAAGTCATATCGGTTGACCATAACGGTGCTGCGACTGTCTGACACGGCTGTCTATTACTGTGCAG-----------TGAG---------------------------------AGACAGCGGAAATAGAAGGTTGATCTTTGGCCGAGGGACCCAGTTAACGG…
aV7.1m_T09_051410	GTTTCTGTGATTCAGGGGGAGACCTCGCTCACGCAATCAGAG---AAGGAAAATGTCACTTTAACCTGCACATACACC---GATGAT---------GTTGTTTACTTGTTCTGGTACCGCCAGCACCCTGGCAGAAAGCCCGAGTTCGCAGTCCGTACGTACAAGACCAGCAGTGATGAATCCCAGGCAGATTTTGCT---CAGAAGCGGTTTTCTAGCACAGTCCAGCAGTCAGACAAGTCATATCGGTTGACCATCTCGGAGCTGCAACTGTCTGACACCGCTGTCTATTACTGTGCAG-----------TCG------------------------------------ACAGCGGAGATAGAAGGTTGATCTTTGGCCGAGGGACCCAGTTAACGG…
aV7.1m_T04_051410	GTTTCTGTGATTCAGGGGGAGACCTTGCTCACGCAATCAGAG---AAGGAAAATGTCACTTTAACCTGCACATACACC---GATGAT---------GTTGGTTACTTGTTCTGGTACCGCCAGCACCCTGGCAGAAAGCCCGAGTTCGCAGTCCGTACGTCCAAGAGCAGCAGTGCTGAATCCAAGGCAGATTTTGCT---CAGAAGCGGTTTTCTAGCACAGTCCAGCAGTCAGACAAGTCATATCGGTTGACCATCACGGAGCTGCAACTGTCTGACACCGCTGTCTATTACTGTGCAGCGAGA------CCGTGGGGG--------------------------GCTGGAGCAGCTGGTTTTAAGCTGATGTTTGGAGAGGGTACAAAGTTAACTG…
aV7.1m_T03_051410	GTTTCTGTGATTCAGGGGGAGACCTTGCTCACGCAATCAGAG---AAGGAAAATGTCACTTTAACCTGCACATACACC---GATGAT---------GTTGGTTACTTGTTCTGGTACCGCCAGCACCCTGGCAGAAAGCCCGAGTTCGCAGTCCGTACGTCCAAGAGCAGCAGTGCTGAATCCAAGGCAGATTTTGCT---CAGAAGCGGTTTTCTAGCACAGTCCAGCAGTCAGACAAGTCATATCGGTTGACCATCACGGAGCTGCAACTGTCTGACACCGCTGTCTATTACTGTGCAGCGAGA------CCGTGGGGG--------------------------GCTGGAGCAGCTGGTTTTAAGCTGATGTTTGGAGAGGGTACAAAGTTAACTG…
aV7.1m_T16_072712	GTTTCTGTGATTCAGGGGGAGACCTCGCTCACGCAATCAGAG---AAGGAAAATGTCACTTTAACCTGCACATACACC---GATGAT---------GTTGATTACTTGTTCTGGTACCGCCAGCACCCTGGCAGAAAGCCCGAGTTCGCAGTCCTTACGTACAAGAGCAGCAGTGATGAATACAAGGCAGATTTTGCT---AAGAAGCGGTTTTCTAGCACAGTCCAGCAGTCAGACAAGTCATATCGGTTGACCATCTCGGAGCTGCAACTGTCTGACACCGCTGTCTATTACTGTGCAGCGAG-------GATC-------------------------------------GATGGCACCAACAACCTTATCTTTGGAGGTGGGACCAGACTGATCG…
aV7.1m_T18_071612	GTTTCTGTGATTCAGGGGGAGACCTCGCTCACGCAATCAGAG---AAGGAAAATGTCACTTTAACCTGCACATACACC---GATGAT---------GTTGATTACTTGTTCTGGTACCGCCAGCACCCTGGCAGAAAGCCCGAGTTCGCAGTCCTTACGTACAAGAGCAGCAGTGATGAATACAAGGCAGATTTTGCT---AAGAAGCGGTTTTCTAGCACAGTCCAGCAGTCAGACAAGTCATATCGGTTGACCATCTCGGAGCTGCAACTGTCTGACACCGCTGTCTATTACTGTGCAGCGAG-------GATC-------------------------------------GATGGCACCAACAACCTTATCTTTGGAGGTGGGACCAGACTGATCG…
aV7.1m_T22_072712	GTTTCTGTGATTCAGGGGGAGACCTCGCTCACGCAATCAGAG---AAGGAAAATGTCACTTTAACCTGCACATACACC---GATGAT---------GTTGATTACTTGTTCTGGTACCGCCAGCACCCTGGCAGAAAGCCCGAGTTCGCAGTCCTTACGTACAAGAGCAGCAGTGATGAATACAAGGCAGATTTTGCT---AAGAAGCGGTTTTCTAGCACAGTCCAGCAGTCAGACAAGTCATATCGGTTGACCATCTCGGAGCTGCAACTGTCTGACACCGCTGTCTATTACTGTGCAGCGAG-------GATC-------------------------------------GATGGCACCAACAACCTTATCTTTGGAGGTGGGACCAGACTGATCG…
aV7.1m_T12_072712	GTTTCTGTGATTCAGGGGGAGACCTCGCTCACGCAATCAGAG---AAGGAAAATGTCACTTTAACCTGCACATACACC---GATGAT---------GTTGATTACTTGTTCTGGTACCGCCAGCACCCTGGCAGAAAGCCCGAGTTCGCAGTCCTTACGTACAAGAGCAGCAGTGATGAATACAAGGCAGATTTTGCT---AAGAAGCGGTTTTCTAGCACAGTCCAGCAGTCAGACAAGTCATATCGGTTGACCATCTCGGAGCTGCAACTGTCTGACACCGCTGTCTATTACTGTGCAGCGAG-------GATC-------------------------------------GATGGCACCAACAACCTTATCTTTGGAGGTGGGACCAGACTGATCG…
aV7.1m_T09_072712	GTTTCTGTGATTCAGGGGGAGACCTCGCTCACGCAATCAGAG---AAGGAAAATGTCACTTTAACCTGCACATACACC---GATGAT---------GTTGATTACTTGTTCTGGTACCGCCAGCACCCTGGCAGAAAGCCCGAGTTCGCAGTCCTTACGTACAAGAGCAGCAGTGATGAATACAAGGCAGATTTTGCT---AAGAAGCGGTTTTCTAGCACAGTCCAGCAGTCAGACAAGTCATATCGGTTGACCATCTCGGAGCTGCAACTGTCTGACACCGCTGTCTATTACTGTGCAGCGAG-------GATC-------------------------------------GATGGCACCAACAACCTTATCTTTGGAGGTGGGACCAGACTGATCG…
aV7.1m_T10_072012	GTTTCTGTGATTCAGGGGGAGACCTCGCTCACGCAATCAGAG---AAGGAAAATGTCACTTTAACCTGCACATACACC---GATGAT---------GTTGATTACTTGTTCTGGTACCGCCAGCACCCTGGCAGAAAGCCCGAGTTCGCAGTCCTTACGTACAAGAGCAGCAGTGATGAATACAAGGCAGATTTTGCT---AAGAAGCGGTTTTCTAGCACAGTCCAGCAGTCAGACAAGTCATATCGGTTGACCATCTCGGAGCTGCAACTGTCTGACACCGCTGTCTATTACTGTGCAGCGAG-------GATC-------------------------------------GATGGCACCAACAACCTTATCTTTGGAGGTGGGACCAGACTGATCG…
aV7.1m_T17_080912	GTTTCTGTGATTCAGGGGGAGACCTCGCTCACGCAATCAGAG---AAGGAAAATGTCACTTTAACCTGCACATACACC---GATGAT---------GTTAATTACTTGTTCTGGTACCGCCAGCACCCTGGCAGAAAGCCCGAGTTCGCGGTCCTTACGTACAAGAGCAGCAGTGCTGAATCCAAGGCAGATTTTGCT---CAGAAGCGGTTTTCTAGCACAGTCCAGCAGTCAGACAAGTCATATCGGTTGACCATCTCGGAGCTGCAACTGTCTGACACCGCTGTCTATTACTGTGCAGCGAGA------CGCCACCCC-----------------------------------GCTAACTACGAGCTTATCTTCGGAGGTGGGACAAGACTGGTAG…
aV7.1m_T11_080212	GTTTCTGTGATTCAGGGGGAGACCTCGCTCACGCAATCAGAG---AAGGAAAATGTCACTTTAACCTGCACATACACC---GATGAT---------GTTAATTACTTGTTCTGGTACCGCCAGCACCCTGGCAGAAAGCCCGAGTTCGCGGTCCTTACGTACAAGAGCAGCAGTGCTGAATCCAAGGCAGATTTTGCT---CAGAAGCGGTTTTCTAGCACAGTCCAGCAGTCAGACAAGTCATATCGGTTGACCATCTCGGAGCTGCAACTGTCTGACACCGCTGTCTATTACTGTGCAGCGAGA------CGCCACCCC-----------------------------------GCTAACTACGAGCTTATCTTCGGAGGTGGGACAAGACTGGTAG…
aV7.1m_T03_080912	GTTTCTGTGATTCAGGGGGAGACCTCGCTCACGCAATCAGAG---AAGGAAAATGTCACTTTAACCTGCACATACACC---GATGAT---------GTTAATTACTTGTTCTGGTACCGCCAGCACCCTGGCAGAAAGCCCGAGTTCGCGGTCCTTACGTACAAGAGCAGCAGTGCTGAATCCAAGGCAGATTTTGCT---CAGAAGCGGTTTTCTAGCACAGTCCAGCAGTCAGACAAGTCATATCGGTTGACCATCTCGGAGCTGCAACTGTCTGACACCGCTGTCTATTACTGTGCAGCGAGA------CGCCACCCC-----------------------------------GCTAACTACGAGCTTATCTTCGGAGGTGGGACAAGACTGGTAG…
aV7.1m_T21_072610	GTTTCTGTGATTCAGGGGGAGACCTCGCTCACGCAATCAGAG---AAGGAAAATGTCACTTTAACCTGCACATACACC---GATGAT---------GTTGATTACTTGTTCTGGTACCGCCAGCACCCTGGCAGAAAGCCCGAGTTCGCAGTCCGTACATACAAGCCCAGCAGTGCTGAATCCAAGGCAGAGTTTGCT---CAGAAGCGGTTTTCTAGCACAGTCCAGCAGTCAGATAAGTCATATCAGTTGACCATCTCTGAGCTGCAACTGTCTGACAACGCTGTCTATTACTGTGCAGCGAGA------CCCAGTCCGATGTAT-----------------------------GATAACACCAAGCTTATCTTTGGAGAAGGGACCAGACTAACAG…
aV7.1m_T17_071612	GTTTCTGTGATTCAGGGGGAGACCTCGCTCACGCAATCAGAG---AAGGAAAATGTCACTTTAACCTGCACATACACC---GATGAT---------GTTGATTACTTGTTCTGGTACCGCCAGCACCCTGGCAGAAAGCCCGAGTTCGCAGTCCGTACATACAAGCCCAGCAGTGCTGAATCCAAGGCAGAGTTTGCT---CAGAAGCGGTTTTCTAGCACAGTCCAGCAGTCAGATAAGTCATATCAGTTGACCATCTCTGAGCTGCAACTGTCTGACAACGCTGTCTATTACTGTGCAGCGAGA------CCCAGTCCGATGTAT-----------------------------GATAACACCAAGCTTATCTTTGGAGAAGGGACCAGACTAACAG…
aV7.1m_T10_071212	GTTTCTGTGATTCAGGGGGAGACCTCGCTTACGCAATCAGAG---AAGGAAAATGTCACTTTAACCTGCACATACACC---GATGAT---------GTTGTTTACTTGTTCTGGTACCGCCAGCACCCTGGCAGAAAGCCCGAGTTCGCAGTCCGTACGTACAAGACCAGCAGTGATGAATCCAAGGCAGATTTTGCT---CAGAAGCGGTTTTCTAGCACAGTACAACAGTCAGACAAGTCATATCGGTTGACCATCTCGGAGCTGCAACTGTCTGACACCGCTGTCTATTACTGTGCAGC----------CTCATCG----------------------------------GGAACTGGTGTTAAGCTTACCTTTGGAGAGGGGACAAAGTTAACCG…
aV7.1m_T17_080212	GTTTCTGTGATTCAGGGGGAGACCTCGCTTACGCAATCAGAG---AAGGAAAATGTCACTTTAACCTGCACATACACC---GATGAT---------GTTGTTTACTTGTTCTGGTACCGCCAGCACCCTGGCAGAAAGCCCGAGTTCGCAGTCCGTACGTACAAGACCAGCAGTGATGAATCCAAGGCAGATTTTGCT---CAGAAGCGGTTTTCTAGCACAGTACAACAGTCAGACAAGTCATATCGGTTGACCATCTCGGAGCTGCAACTGTCTGACACCGCTGTCTATTACTGTGCAGC----------CTCATCG----------------------------------GGAACTGGTGTTAAGCTTACCTTTGGAGAGGGGACAAAGTTAACCG…
aV7.1m_T21_080912	GTTTCTGTGATTCAGGGGGAGACCTCGCTCACGCAATCAGAG---AAGGAAAATGTCACTTTAACCTGCACATACACC---GATGAT---------GTTAATTACTTGTTCTGGTACCGCCAGCACCCTGGCAGAAAGCCCGAGTTCGCAGTCCGTACGTACAAGACCAGCAGTGCTGAATACAAGGCAGATTTTGCT---AAGAAGCGGTTTTCTAGCACAGTCCAGCAGTCAGACAAGTCATATCGGTTGACCATCTCGGAGCTGCAACTGTCTGACACCGCTGTCTATTACTGTGCAGCGAGA------CTG-----------------------------------TTGAATAGCTTGGACGTGCTAACATTTGGATCTGGGACCAAGCTGACGG…
aV7.1m_T05_072610	GTTTCTGTGATTCAGGGGGAGACCTCGCTCACGCAATCAGAG---AAGGAAAATGTCACTTTAACCTGCACATACACC---GATGAT---------GTTAATTACTTGTTCTGGTACCGCCAGCACCCTGGCAGAAAGCCCGAGTTCGCAGTCCGTACGTACAAGACCAGCAGTGCTGAATACAAGGCAGATTTTGCT---AAGAAGCGGTTTTCTAGCACAGTCCAGCAGTCAGACAAGTCATATCGGTTGACCATCTCGGAGCTGCAACTGTCTGACACCGCTGTCTATTACTGTGCAGCGAGA------CTG-----------------------------------TTGAATAGCTTGGACGTGCTAACATTTGGATCTGGGACCAAGCTGACGG…
aV7.1J_T15_100710	GTTTCTGTTACCCAGCGGGAGCCCTCACTCACACAAACAGAG---GGAGAAGACGTCACTTTAACCTGCACATACACC---GGGACT---------GTTTATTACTTGTTTTGGTACCGCCAATACCCTGGCAGAGAGCCCGAGTTCGCAGTCAGGAGAATGGAGAGCGGCGGTGCTGAATTCAAGGCGGATTTTGCT---CAGAAGCGATTTTCTGCCGCAAACCAGCAGTCAGACAAGTTGTACCGATTGACGATCTTGGAGCTGCTGTCGTCTGACACCGCTGTCTATTATTGTGCAGCGA--------CCGAT------------------------------------GATGGCACCAGGAAGCTTATCTTTGGAGATGGGACCAGACTGATCG…
aV7.1J_V11_110210	GTTTCTGTTACCCAGCGGGAGCCCTCACTCACACAAACAGAG---GGAGAAGACGTCACTTTAACCTGCACATACACC---GGGACT---------GTTTATTACTTGTTTTGGTACCGCCAATACCCTGGCAGAGAGCCCGAGTTCGCAGTCAGGAGAATGGAGAGCGGCGGTGCTGAATTCAAGGCGGATTTTGCT---CAGAAGCGATTTTCTGCCGCAAACCAGCAGTCAGACAAGTTGTACCGATTGACGATCTTGGAGCTGCTGTCGTCTGACACCGCTGTCTATTATTGTGCAGCGA--------CCGAT------------------------------------GATGGCACCAGGAAGCTTATCTTTGGAGATGGGACCAGACTGATCG…
aV7.1m_T02_051410	GTTTCTGTGATTCAGGGGGAGACCTCGCTCACGCAATCAGAG---AAGGAAAATGTCACTTTAACCTGCACATACACC---GATGAT---------GTTGGTTACTTGTTCTGGTACCGCCAGCACCCTGGCAGAAAGCCCGAGTTCGCAGTCCGTACGTCCAAGAGCAGCAGTGCTGAATCCAAGGCAGATTTTGCT---CAGAAGCGGTTTTCTAGCACAGTCCAGCAGTCAGACAAGTCATATCGGTTGACCATCTCGGAGCTGCAACTGTCTGACACCGCTGTCTATTACTGTGCAGCGAGA------TTGTCGGCTGAT-----------------------------GGAGCTGGTTACAAGCTTACCTTTGGACAGGGGACAAAGTTAACCG…
aV7.1J_T01_100710	GTTTCTGTGATTCAGGGGGAGACCTCGCTCACGCAATCAGAG---AAGGAAAATGTCACTTTAACCTGCACATACACC---GATGAT---------GTTGGTTACTTGTTCTGGTACCGCCAGCACCCTGGCAGAAAGCCCGAGTTCGCAGTCCGTACGTCCAAGAGCAGCAGTGCTGAATCCAAGGCAGATTTTGCT---CAGAAGCGGTTTTCTAGCACAGTCCAGCAGTCAGACAAGTCATATCGGTTGACCATCTCGGAGCTGCAACTGTCTGACACCGCTGTCTATTACTGTGCAGCGAGA------CCTGGGTAT--------------------------------GATGGCACCAGGAAGCTTATCTTTGGAGATGGGACCAGACTGATCG…
aV7.1J_V09_090110	GTTTCTGTGATTCAGGGGGAGACCTCGCTCACGCAATCAGAG---AAGGAAAATGTCACTTTAACCTGCACATACACC---GATGAT---------GTTGGTTACTTGTTCTGGTACCGCCAGCACCCTGGCAGAAAGCCCGAGTTCGCAGTCCGTACGTCCAAGAGCAGCAGTGCTGAATCCAAGGCAGATTTTGCT---CAGAAGCGGTTTTCTAGCACAGTCCAGCAGTCAGACAAGTCATATCGGTTGACCATCTCGGAGCTGCAACTGTCTGACACCGCTGTCTATTACTGTGCAGCGAG-------AGAGTACATGGAA-------------------------------TATGGCAACACTCTCTTATTCGCTTCTGGGACCAGGCTGACCG…
aV7.1J_T02_100710	GTTTCTGTGATTCAGGGGGAGACCTCGCTCACGCAATCAGAG---AAGGAAAATGTCACTTTAACCTGCACATACACC---GATGAT---------GCTGGTTACTTGTTCTGGTACCGCCAGCACCCTGGCAGAAAGCCCGAGTTCGCAGTCCGTACGTACAAGAGCAGCAGTGCTGAATCCAAGGCAGATTTTGCT---CAGAAGCGGTTTTCTAGCACCATCCAGCAGTCAGACAAGTCATATCGGTTGACCATCTCGCAGCTGCAACTGTCTGACACCGCTGTCTATTACTGTGCAG-----------AG---------------------------------------AATGATGGCATCAGCCTTATCTTTGGAAATGGGACCAGACTGACAG…
aV7.1m_T16_051410	GTTTCTGTGATTCAGGGGGAGACCTTGCTCACGCAATCAGAG---AAGGAAAATGTCACTTTAACCTGCACATACACC---GATGAT---------GTTGGTTACTTGTTCTGGTACCGCCAGCACCCTGGCAGAAAGCCCGAGTTCGCAGTCCGTACGTCCAAGAGCAGCAGTGCTGAATCCAAGGCAGATTTTGCT---CAGAAGCGGTTTTCTAGCACAGTCCAGCAGTCAGACAAGTCATATCGGTTGACCATCACGGAGCTGCAACTGTCTGACACCGCTGTCTATTACTGTGCAG-----------ATACGGCTGCTGGC---------------------------------ACTGACAGACTTATCTTTGGAGGTGGGACCAGACTGACAG…
aV7.1J_V04_110210	GTTTCTGTGATTCAGGGGGAGACCTTGCTCACGCAATCAGAG---AAGGAAAATGTCACTTTAACCTGCACATACACC---GACGAT---------GTTGGTTACTTGTTCTGGTACCGCCAGCACCCTGGCAGAAAGCCCGAGTTCGCAGTCCGTACGTCCAAGAGCAGCAGTGTTGACTCCAAGGCAGATTTTGCT---CAGAAGCGGTTTTCTAGCACAGTCCAGCAGTCAGACAAGTCATATCGGTTGACCATCACGGAGATGCAACTGTCTGACACCGCTGTCTATTACTGTGCAGCGAGA------CGGGT--------------------------------------TGGCACCAGGAAGTTTATCTTTGGAGATGGGACCAGACTGATCG…
aV7.1m_T14_080212	GTTTCTGTGATTCAGGGGGAGACCTCGCTCACGCAATCAGAG---AAGGAAAATGTCACTTTAACCTGCACATACACC---GATGAT---------GTTGATTACTTGTTCTGGTACCGCCAGCACCCTGGCAGAAAGCCCGAGTTCGCGGTCCTTACGTACAAGAGCAGCAGTGCTGAATCCAAGGCAGATTTTGCT---CAGAAGCGGTTTTCTAGCACAGTCCAGCAGTCAGACAAGTCATATCGGTTGACCATCTCGGAGCTGCAACTGTCTGACACCGCTGTCTATTACTGTGCAGCGAGA------CCGGCC--------------------------------GCTGGAACTGGTGTTAAGCTTACCTTTGGAGAGGGGACAAAGTTAACCG…
aV7.1J_V10_091410	GTTTCTGTGATTCAGGGGGAGACGTCGCTCACGCAATCAGAG---AAGGAAAATGTCACTTTAACCTGCACATACACC---GATGAT---------GTTAATTACTTGTTCTGGTACCGCCAGCACCCTGGCAGAAAGCCCGAGTTCACGGTCCTTACGTACAAGAGCAGCAGTGCTGAATCCAAGGCAGATTTTGCT---CAGAAGCGGTTTTCTAGCACAGTCCAGCAGTCAGACAAGTCATATCGGTTGACCATCTCGGAGCTGCAACTGTCTGACACCGCTGTCTATTACTGTGCAGCGAG-------CCGGAAT----------------------------------ACAGGCTATGACAAGCTTATCTTTGGAGGTGGGACCAGACTGACAG…
aV7.1m_T19B_060712	GTTTCTGTGATTCAGGGGGAGACCTCGCTCACGCAATCAGAG---AAGGAAAATGTCACTTTAACCTGCACATACACC---GATGAT---------GTTAATTACTTGTTCTGGTACCGCCAGCACCCTGGCAGAAAGCCCGAGTTCGCGGTCCTTACGTACAAGAGCAGCAGTGCTGAATCCAAGGCAGATTTTGCT---CAGAAGCGGTTTTCTAGCACAGTCCAGCAGTCAGACAAGTCATATCGGTTGACCATCTCGGAGCTGCAACTGTCTGACACCGCTGTCTATTACTGTGC-------------GGAG-------------------------------GGATCTGGAGTCTTTGGCAACCTGGTGTTTGGAGGTGGTACCAGACTCACCG…
aV7.1m_T20_051410	GTTTCTGTGATTCAGGGGGAGACCTCGCTCACGCAATCAGAG---AAGGAAAATGTCACTTTAACCTGCACATACACC---GATGAT---------GTTAATTACTTGTTCTGGTACCGCCAGCACCCTGGCAGAAAGCCCGAGTTCGCGGTCCTTACGTACAAGAGCAGCAGTGCTGAATCCAAGGCAGATTTTGCT---CAGAAGCGGTTTTCTAGCACAGTCCAGCAGTCAGACAAGTCATATCGGTTGACCATCTCGGAGCTGCAACTGTCTGACACCGCTGTCTATTACTGTGCAGCGAGA------CTAGGCTCTGGA-----------------------------------AACACCCCCCTCGTGTTTGGAAATGGGACCCGACTCATAG…
aV7.1J_T22_100410	GTTTCTGTGATTCAGGGGGAGACCTCGCTCACGCAATCAGAG---AAGGAAAATGTCACTTTAACCTGCACATACACC---GATGAT---------GTTGATTACTTGTTCTGGTACCGCCAGCACCCTGGCAGAAAGCCCGAGTTCGCAGTCCTTACGTACAAGAGCAGCAGTGATGAATACAAGGCAGATTTTGCT---AAGAAGCGGTTTTCTAGCACAGTCCAGCAGTCAGACAAGTCATATCGGTTGACCATCTCGGAGCTGCAACTGTCTGACACCGCTGTCTATTACTGTGCAGCG---------TCTATGAGGCGG--------------------------------GGTGCCAACAGCCTTATCTTTGGAGGTGGGACCAGACTGATCG…
aV7.1J_V18_091410	GTTTCTGTGATTCAGGGGGAGACCTCGCTCACGCAATCAGAG---AAGGAAAATGTCACTTTAACCTGCACATACACC---GATGAT---------GTTGATTACTTGTTCTGGTACCGCCAGCACCCTGGCAGAAAGCCCGAATTCGCAGTCCTTACGTACAAGAGCAGCAGTGATGAATACAAGGCAGATTTTGCT---AAGAAGCGGTTTTCTACCACAGTCCAGCAGTCAGACAAGTCATATCGGTTGACCATCTCGGATCTGCAACTGTCTGACACCGCTGTCTATTACTGTGCAGC----------CAATGGGAACTAT-------------------------------GCAAACAGCCCACTTGTCTTTGGACCTGGAACCAGATTAATAG…
aV7.1J_V03_091410	GTTTCTGTGATTCAGGGGGAGACCTCGCTCACGCAATCAGAG---AAGGAAAATGTCACTTTAACCTGCACATACACC---GATGAT---------GTTGATTACTTGTTCTGGTACCGCCAGCACCCTGGCAGAAAGCCCGAGTTCACAGTCCTTACGTACAAGAGCAGCAGTGATGAATACAAGGCAGATTTTGCT---AAGAAGCGGTTTTCTAGCACAGTCCAGCAGTCAGACAAGTCATATCGGTTGACCATCTCGGAGCTGCAACTGTCTGACACCGCTGTCTATTACTGTGCAGCGAGA------CTAGTG-----------------------------------------GGCAACACTCTCTTATTCGCTTCTGGGACCAGGCTGACCG…
aV7.1m_T13B_060712	GTTTCTGTGATTCAGGGGGAGACCTCGGTTACGCAATCAGAG---AAGGAAAATGTCACTTTAACCTGCACATACACC---GATGAT---------GTTGTTTACTTGTTCTGGTACCGCCAGCACCCTGGCAGAAAGCCCGAGTTCGCAGTCCTTAGGTACAAGACCAGCAGTGCTGAATCCAAGGCAGATTTTGCT---CAGAAGCGGTTTTCTAGCACAGTCCAGCAGTCAGACAAGTCATATCGGTTGACCATCTCGGAGCTGCAACTGTCTGACACCGCTGTCTATTACTGTGCAG-----------TCGCGAAT------------------------------GCTGGAACTGGTGTTAAGCTTACCTTTGGAGAGGGGACAAAGTTAACCG…
aV7.1m_T20B_060712	GTTTCTGTGATTCAGGGGGAGACCTCGGTTACGCAATCAGAG---AAGGAAAATGTCACTTTAACCTGCACATACACC---GATGAT---------GTTGTTTACTTGTTCTGGTACCGCCAGCACCCTGGCAGAAAGCCCGAGTTCGCAGTCCTTAGGTACAAGACCAGCAGTGCTGAATCCAAGGCAGATTTTGCT---CAGAAGCGGTTTTCTAGCACAGTCCAGCAGTCAGACAAGTCATATCGGTTGACCATCTCGGAGCTGCAACTGTCTGACACCGCTGTCTATTACTGTGCAGCGAGA------TAT-----------------------------------------GCTAACGCCAAGTTTATCTTTGGAGGTGGAACAAGACTGATCG…
aV7.1J_T08_100410	GTTTCTGTGATTCAGGGGGAGACCTTGCTCACGCAATCAGAG---AAGGAAAATGTCACTTTATCCTGCACATACACC---GATGAT---------GTTGGTTACTTGTTCTGGTACCGCCAGCACCCTGGCAGAAAGCCCGAGTTCGCAGTCCTTACGTACAAGACCAGCAGTGCTGAATCCAAGGCAGATTTTGCT---CAGAAGCGGTTTTCTAGCACAGTCCAGCAGTCAGACAAGTCATATCGGTTGACCATCTCGGAGCTGCAACTGTCTGACACCGCTGTCTATTACTGTGCAGCGAGA------TGGACCCCCTATACT--------------------------GGAGTAGCTGATCAGCTTATCTTTGGAGAGGGGACAAAGTTGACCG…
aV7.1J_T16_100710	GTTTCTGTGATTCAGGGGGAGACCTCGCTCACGCAATCAGAG---AAGGAAAATGTCACTTTAACCTGCACATACACC---GATGAT---------GTTGATTACTTGTTCTGGTACCGCCAGCACCCTGGCAGAAAGCCCGAGTTCGCAGTCCGTACATACAAGCCCAGCAGTGCTGAATCCAAGGCAGAGTTTGCT---CAGAAGCGGTTTTCTAGCACAGTCCAGCAGTCAGATAAGTCATATCAGTTGACCATCTCTGAGCTGCAACTGTCTGACAACGCTGTCTATTACTGTGCAGCGAGA------CTATCAGATGTTGGCACC-----------------------------------AAGCTTATCTTTGGAGAAGGGACCAGACTAACAG…
aV7.1m_T17_051410	GTTTCTGTGATTCAGGGGGAGACCTCGCTCACGCAATCAGAG---AAGGAAAATGTCACTTTAACCTGCACATACACC---GATGAT---------GTTGATTACTTGTTCTGGTACCGCCAGCACCCTGGCAGAAAGCCCGAGTTCGCAGTCCGTACATACAAGCCCAGCAGTGCTGAATCCAAGGCAGAGTTTGCT---CAGAAGCGGTTTTCTAGCACAGTCCAGCAGTCAGATAAGTCATATCAGTTGACCATCTCTGAGCTGCAACTGTCTGACAACGCTGTCTATTACTGTGCAGCG---------GTCACG--------------------------------AACAGCGGAGATAGAAGGTTGATCTTTGGCCGAGGGACCCAGTTAACGG…
aV7.1m_T12_051410	GTTTCTGTGATTCAGGGGGAGACCTTGCTCACGCAATCAGAG---AAGGAAAATGTCACTTTAACCTGCACATACACC---GATGAT---------GTTGATTACTTGTTCTGGTACCGCCAGCACCCTGGCAGAAAGCCCGAGTTCGCGGTCCTTACGTACAAGAGCAGCAGTGCTGAATCCAAGGCAGATTTTGCT---CAGAAGCGGTTTTCTAGCACAGTCCAGCAGTCAGACAAGTCATATCGGTTGACCATCACGGAGCTGCAACTGTCTGACACCGCTGTCTATTACTGTGCAGCGAG-------GGGT-------------------------------------ACAGGCTATGACAAGCTTATCTTTGGAGGTGGGACCAGACTGACAG…
aV7.1m_T06_051410	GTTTCTGTGATTCAGGGGGAGACCTCGCTTACGCAATCAGAG---AAGGAAAATGTCACTTTAACCTGCACATACACC---GATGAT---------GTTGTTTACTTGTTCTGGTACCGCCAGCACCCTGGCAGAAAGCCCGAGTTCGCAGTCCGTACGTACAAGACCAGCAGTGATGAATCCAAGGCAGATTTTGCT---CAGAAGCGGTTTTCTAGCACAGTACAACAGTCAGACAAGTCATATCGGTTGACCATCTCGGAGCTGCAACTGTCTGACACCGCTGTCTATTACTGTGCAGCGAGA------GGGATTTCNN--------------------------------GAGTAGCTGATCAGCTTATCTTTGGAGAGGGGACAAAGTTGACCG…
aV7.1J_T07_100410	GTTTCTGTGATTCAGGGGGAGACCTCGCTTACGCAATCAGAG---AAGGAAAATGTCACTTTAACCTGCACATACACC---GATGAT---------GTTGTTTACTTGTTCTGGTACCGCCAGCACCCTGGCAGAAAGCCCGAGTTCGCAGTCCGTACGTACAAGACCAGCAGTGATGAATCCAAGGCAGATTTTGCT---CAGAAGCGGTTTTCTAGCACAGTACAACAGTCAGACAAGTCATATCGGTTGACCATCTCGGAGCTGCAACTGTCTGACACCGCTGTCTATTACTGTGCAGC----------TTAAGAA----------------------------TATGGTACAGGTGCTGAAAAGCTGATCTTCGGAGCAGGGACCAGGCTCACTG…
aV7.1m_T14B_060712	GTTTCTGTGATTCAGGGGGAGACCTCGCTCACGCAATCAGAG---AAGGAAAATGTCACTTTAACCTGCACATACACC---GATGAT---------GTTAATTACTTGTTCTGGTACCGCCAGCACCCTGGCAGAAAGCCCGAGTTCGCAGTCCGTACGTACAAGACCAGCAGTGCTGAATACAAGGCAGATTTTGCT---AAGAAGCGGTTTTCTAGCACAGTCCAGCAGTCAGACAAGTCATATCGGTTGACCATCTCGGAGCTGCAACTGTCTGACACCGCTGTCTATTACTGTGCAGCGAGA------GCCGGCGGG--------------------------GGATCTGGAGTCTTTGGCAACCTGGTGTTTGGAGGTGGTACCAGACTCACCG…
aV7.1m_T18_051410	GTTTCTGTGATTCAGGGGGAGACCTCGCTCACGCAATCAGAG---AAGGAAAATGTCACTTTAACCTGCACATACACC---GATGAT---------GTTGTTTACTTGTTCTGGTACCGCCAGCACCCTGGCAGAAAGCCCGAGTTCGCAGTCCGTACGTACAAGACCAGCAGTGATGAATCCCAGGCAGATTTTGCT---CAGAAGCGGTTTTCTAGCACAGTCCAGCAGTCAGACAAGTCATATCGGTTGACCATCTCGGAGCTGCAACTGTCTGACACCGCTGTCTATTACTGTGCAGC----------GGGGGAT-------------------------------GGTACAGGTGCTGAAAAGCTGATCTTCGGAGCAGGGACCAGGCTCACTG…
aV7.1J_T04_100710	GTTTCTGTGATTCAGGGGGAGACCTCGCTTACGCAATCAGAG---AAGGAAAATGTCACTTTAACCTGCACATACACC---GATGAT---------GTTGTTTACTTGTTCTGGTACCGCCAGCACCCTGGCAGAAAGCCCGAGTTCGCAGTCCGTACGTACAAGACCAGCAGTGATGAATCCAAGGCAGATTTTGCT---CAGAAGCGGTTTTCTAGCACAGTACAACAGTCAGACAAGTCATATCGGTTGACCATCTCGGAGCTGCAACTGTCTGACACCGCTGTCTATTACTGTGCAGCGAGA------CGTCCGC-----------------------------------ATGGCACCAGGAAGCTTATCTTTGGAGATGGGACCAGACTGATCG…
aV7.1J_T20_100410	GTTTCTGTGATTCAGGGGGAGACCTCGCTTACGCAATCAGAG---AAGGAAAATGTCACTTTAACCTGCACATACACC---GATGAT---------GTTGTTTACTTGTTCTGGTACCGCCAGCACCCTGGCAGAAAGCCCGAGTTCGCAGTCCGTACGTACAAGACCAGCAGTGATGAATCCAAGGCAGATTTTGCT---CAGAAGCGGTTTTCTAGCACAGTACAACAGTCAGACAAGTCATATCGGTTGACCATCTCGGAGCTGCAACTGTCTGACACCGCTGTCTATTACTGTGCAGCGAGA------CTACTN--------------------------------------GGAAACACCCCCCTCGTGTTTGGAAATGGGACCCGACTCATAG…
aV7.1B_A_419.42	GTTTCTGTGATTCAGGGGGAGACCTCGCTTACGCAATCAGAG---AAGGAAAATGTCACTTTAACCTGCACATACACC---GATGAT---------GTTGTTTACTTGTTCTGGTACCGCCAGCACCCTGGCAGAAAGCCCGAGTTCGCAGTCCGTACGTACAAGACCAGCAGTGATGAATCCAAGGCAGATTTTGCT---CAGAAGCGGTTTTCTAGCACAGTACAACAGTCAGACAAGTCATATCGGTTGACCCTCTCGGAGCTGCAACTGTCTGACACCGCTGTCTATTACTGTGCAGCG---------GGCTCTAACTNN--------------------------------GGAAACACCCCCCTCGTGTTTGGAAATGGGACCCGACTCATAG…
aV7.1m_T16B_060712	GTTTCTGTTACTCAGAGGGAGCCCTCACTCACACAAACAGAG---GGAGAAAATGTCTCTTTCAACTGCACCTACCCC---GACAGT---------GTTTATTACTTGTTTTGGTATCGTCAGTACCCTGGCAGTCAGCCCGAGTTCGCAGTCCAGAGGCTCAAGAGCAGCAGTACTGAATTTAAGGCAGATTTTGCT---CAGAAGCGGTTTTCTGGTACAGTCCAGCAGTCAGAAAAGTTGTACCAATTGACGATCTCGGAGGTGCTGCTCACTGACACGGCTGTCTATTACTGTGCAGC----------AGTCAATAC----------------------------------TGGAGGCTACGGGCTTACATTCGGAAATGGGACAAGGCTAACTG…
aV7.1B_A_419.43	GTTTATGTTACTCAGAGGGAGCCCTCACTCACACAAACAGAG---GGAGAAAATGTCTCTTTCAACTGCACCTACCCC---GACAGT---------GTTTATTACTTGTTTTGGTATCGTCAGTACCCTGGCAGTCAGCCCGAGTTCGCAGTCCAGAGGCTCAAGAGCAGCAGTACTGAATTTAAGGCAGATTTTGCT---CAGAAGCGGTTTTCTGGTACAGTCCAGCAGTCAGAAAAGTTGTACCAATTGACGATCTCGGAGGTGCTGCTCACTGACACGGCTGTCTATTACTGTGCAGC----------AACCGAGTCA----------------------------------TATGGCAACACTCTCTTATTCGCTTCTGGGACCAGGCTGACCG…
aV7.1J_V02_102810	GTTTCTGTGATTCAGGGGGAGACCTTAATCATACAATCAGAG---AAGGAAAATGTTACTTTAATCTGCACATACAGC---GATGAT---------GTTGATTACTTGTTCTGGTACCGCCAGCACCCTGGCAGAAAGCCCGAGTTCGCGGTCCTTACGTACAAAACTAGCAGTAGAGAACGTAAGGCAGAATTTGCT---CAGAAGCGGTATTCTAGCGCAGTCCAGCAGTCAGACAAGTCATATCGGTTGACCATCACGTGTCTGGAACTGTCTGACACCTCTGTCTATTACTGTGCAGC----------GGGGGCT-------------------------------------GCCACCAACAAGCTTATCTTTGGAGGTGGGACCAGACTGACAG…
aV7.1m_T20_080212	GTTTCTGTGACTCAGGGGGAGTCCGCGCTCACGCAATCAGAG---AGGGAAAAGGTCACTTTAACCTGCACGTACACC---GATGAT---------GTTGATTACTTGTTCTGGTACCGCCAGCACCCTGGCAGAAAGCCCGATTTCGCAGTCCGTAGGCACAAGACCGGCAGGGCTGAATCCAAGGCAGATTTTGCT---CAGAAGCGGTTTTCTGACACAGTCCAGCAGTCAGACAAGTCATACCGGTTGACCATCTCGGAGCTGCAACTGTCTGACACCGCTGTCTATTACTGTGCAGCGAGA------GGCGAG--------------------------------------GATAACACCAAGCTTATCTTTGGAGAAGGGACCAGACTAACAG…
aV7.1m_T12_072610	GTTTCTGTAACTCAGGGGGAGTCCTCTCTCACGCAATCAGAG---AGGGAAAATATCACTTTAACCTGTACGTACACC---GATGAT---------GTTGATTACTTGTTCTGGTACCGCCAGCACGCAGGCAGAAAACCCGATTTCGCAGTCCGTAGGCACAAGACTGGCGGTGCTGTATTCAAGGCAGATTTTGCT---CAGAAGCGGTTTTCTGACACAGTCCAGCAGTCAGACAAATCATACCGGTTGACCATCTCGGAGCTGCAACTGTCTGACACCGCTGTCTATTACTGTGCAGCGA--------TACAATAT------------------------------------GCAAACAGCCCACTTGTCTTTGGAAATGGAACCAGACTAATAG…
aV7.1B_A_419.13	GTTTCTGTGATTCAGGGGGAGACCTCGCTCACGCAATCAGAG---AAGGAAAATGTCACTTTAACCTGCACATACACC---GATGAT---------GTTGATTACTTGTTCTGGTACCGCCAGCACCCTGGCAGAAAGCCCGAGTTCGCGGTCCGTACGATTAAGAGCAGCAGTGCTGAATCCAAGGCAGATTTTGCT---CAGAAGCGGTTTTCTAGCACAGTCCAGCAGTCAGACAAGTCATATCGGTTGACCATCTCGGAGCTGCAACTGTCTGACACCGCTGTCTATTACTGTGCAGCGAG-------CCGCCGCCTAGGT-------------------------------GCAGCCAACAGGCTTATCTTTGGAGGTGGGACCAGACTGATAG…
aV7.1J_V21_090110	GTTTCTGTGATTCAGGGGGAGACCTCGCTCACGCAATCAGAG---AAGGAAAATGTCACTTTAACCTGCACATACACC---GATGAT---------GTTGATTACTTGTTCTGGTACCGCCAGCACCCTGGCAGAAAGCCCGAGTTCGCAGTCCGTACATACAAGCCCAGCAGTGCTGAATCCAAGGCAGAGTTTGCT---CAGAAGCGGTTTTCTAGCACAGTCCAGCAGTCAGATAAGTCATATCAGTTGACCATCTCTGAGCTGCAACTGTCTGACAACGCTGTCTATTACTGTGCAGCGAGA------TGGACT--------------------------------------GGAAACACCCCCCTCGTGTTTGGAAATGGGACCCGACTCATAG…
aV7.1J_V03_101310	GTTTCTGTGATTCAGGGGGAGACCTTGCTCACGCAATCAGAG---AAGGAAAATGTCACTTTAACCTGCACAAAGACC---GATGAT---------GTTGATTACTTGTTCTGGTACCGCCAGCACCCTGGCAGAAAGCCCGAGTTCGCGGTCCTTATGTGCAAGAGCAGCAGTGCTGAATCAAAGGCAGATTTTGCT---CAGAAGCGGTTTTCTAGCACAGTCCAGCAGTCAGACAAGTCATATCGGTTGACCATCACGGAGCTGCAACAGTCTGACACCGCTGTCTATTACTGTGCAGCGAGA------CGGCTTCTGAACTAT-----------------------------GCAAACAGCCCACTTGTCTTTGGAAATGGAACCAGACTAATAG…
aV9.1m_T10_080212	GTATTGTTGACTCAACCGGAGGAAGAGACAGGCATTGCC------GGACAGTATCTGAGACTGACATGTAAAACCAGC---GGGTTTGATCTGAATGCATACACTATGTACTGGTACCGACGAAGTCCTGGGAATGGCCTACAATGGCTAGTTCGGTACTATACAGAA---GACAGCAAGTATTTTAATACAGAGTTT---GAAAAGCGAGTTGCTGCTTACAAAGACCTTACAAACAATATGTTCACTTTGGATATCAGACGATTGAGGATTTCAGATCACGCATCATATTATTGTGCAAGAC--------NNGGTGATACT------------------------------GGAGTAGCTGATCAGCTTATCTTTGGAGAGGGGACAAAGTTGACCG…
aV9.1m_T20_072012	GTATTGTTGACTCAACCGGAGGAAGAGACAGGCATTGCC------GGACAGTATCTGAGACTGACATGTAAAACCAGC---GGGTTTGATCTGAATGCATACACTATGTACTGGTACCGACGAAGTCCTGGGAATGGCCTACAATGGCTAGTTCGGTACTATACAGAA---GACAGCAAGTATTTTAATACAGAGTTT---GAAAAGCGAGTTGCTGCTTACAAAGACCTTACAAACAATATGTTCACTTTGGATATCAGACGATTGAGGATTTCAGATCACGCATCATATTATTGTGCAAGAC--------NNGGTGATACT------------------------------GGAGTAGCTGATCAGCTTATCTTTGGAGAGGGGACAAAGTTGACCG…
aV9.1m_T05_080212	GTATTGTTGACTCAACCGGAGGAAGAGACAGGCATTGCC------GGACAGTATCTGAGACTGACATGTAAAACCAGC---GGGTTTGATCTGAATGCATACACTATGTACTGGTACCGACGAAGTCCTGGGAATGGCCTACAATGGCTAGTTCGGTACTATACAGAA---GACAGCAAGTATTTTAATACAGAGTTT---GAAAAGCGAGTTGCTGCTTACAAAGACCTTACAAACAATATGTTCACTTTGGATATCAGACGATTGAGGATTTCAGATCACGCATCATATTATTGTGCAAGAC--------NNGGTGATACT------------------------------GGAGTAGCTGATCAGCTTATCTTTGGAGAGGGGACAAAGTTGACCG…
aV9.1m_T16_071612	GTATTGTTGACTCAACCGGAGGAAGAGACAGGCATTGCC------GGACAGTATCTGAGACTGACATGTAAAACCAGC---GGGTTTGATCTGAATGCATACACTATGTACTGGTACCGACGAAGTCCTGGGAATGGCCTACAATGGCTAGTTCGGTACTATACAGAA---GACAGCAAGTATTTTAATACAGAGTTT---GAAAAGCGAGTTGCTGCTTACAAAGACCTTACAAACAATATGTTCACTTTGGATATCAGACGATTGAGGATTTCAGATCACGCATCATATTATTGTGCAAGAC--------CCCAT---------------------------------------GATGGCTACAAGCTTATCTTTGGAGGTGGGACCAGACTGACAG…
aV9.1m_T15_080212	GTATTGTTGACTCAACCGGAGGAAGAGACAGGCATTGCC------GGACAGTATCTGAGACTGACATGTAAAACCAGC---GGGTTTGATCTGAATGCATACACTATGTACTGGTACCGACGAAGTCCTGGGAATGGCCTACAATGGCTAGTTCGGTACTATACAGAA---GACAGCAAGTATTTTAATACAGAGTTT---GAAAAGCGAGTTGCTGCTTACAAAGACCTTACAAACAATATGTTCACTTTGGATATCAGACGATTGAGGATTTCAGATCACGCATCATATTATTGTGCAAGAC--------CCCAT---------------------------------------GATGGCTACAAGCTTATCTTTGGAGGTGGGACCAGACTGACAG…
aV9.1m_T09_071612	GTATTGTTGACTCAACCGGAGGAAGAGACAGGCATTGCC------GGACAGTATCTGAGACTGACATGTAAAACCAGC---GGGTTTGATCTGAATGCATACACTATGTACTGGTACCGACGAAGTCCTGGGAATGGCCTACAATGGCTAGTTCGGTACTATACAGAA---GACAGCAAGTATTTTAATACAGAGTTT---GAAAAGCGAGTTGCTGCTTACAAAGACCTTACAAACAATATGTTCACTTTGGATATCAGACGATTGAGGATTTCAGATCACGCATCATATTATTGTGCAAGAC--------CCCAT---------------------------------------GATGGCTACAAGCTTATCTTTGGAGGTGGGACCAGACTGACAG…
aV9.1B_A_419.46	GACGAATTGATGCAATATCCTCCGAGGATAGTTGTCAGTGAATTGGGAATTACGTCC---ATGAATTGCTCAATT------GCCGTG------ACATTTAACACCGTGCATTGGTACAGACAGCTTCCTAATATGCCACCCCAGCATGTGGTGATGGCCAAAAGAGAAGCTGATCAG------------------------CGTGAGAGGATCATCGCTTCAGTCAGTGGAGATTACAAACTCAGTACCTTGACTGTGAAAGACGCCAGACTGAATGACACCGCCACTTACCTCTGTGCTA-----------AGCAC---------------------------------TACGGAACTGGTAATAAGCTTATCTTTGGAGAGGGGACAAAGTTAACCG…
aV9.1B_A_419.47	GACGAATTGATGCAATATCCTCCGAGGATAGTTGTCAGTGAATTGGGAATTACGTCC---ATGAATTGCTCAATT------GCCGTG------ACATTTAACACCGTGCATTGGTACAGACAGCTTCCTAATATGCCACCCCAGCATGTGGTGATGGCCAAAAGAGAAGCTGATCAG------------------------CGTGAGAGGATCATCGCTTCAGTCAGTGGAGATTACAAACTCAGTACCTTGACTGTGAAAGACGCCAGACTGAATGACACCGCCACTTACCTCTGTGCTA-----------AGCAC---------------------------------TACGGAACTGGTAATAAGCTTATCTTTGGAGAGGGGACAAAGTTAACCG…
aV9.1J_V05_110210	GGCGAAGTGACGCAACTTCAACCAACGAATGTTGTTAGTAAAANNTGGGAATTACCTTTCATGAATTGCTCCATTGCC---ACTACA---------TTTAACACCGTGCATTGGTACAAACAGCAACCGAATATGCCACTGCAAAATCTGGTGATGGCCAAAAGAGAATCTGACCAG------------------------CCTGAGAGGATTACTATTTCAACAGTGGAGATTACAAACTTANGTATCTTGACTGCGAAAGACGCCAGACTTAATGACACTGCCACCTATCTCTGTGC-------------CAATGGCATTCGGAATGCTGGCACTGAC-------------------------AGACTTATCTTTGGAGGTGGGACCAGACTGACAG…
aV9.1J_V16_091410	---------------------------------------------------------------------------------------------ACATTTAACACCGTGGCTTGGTACAAACAGCAACCGAATATGCCACTGCAAAATCTGGTGATGGCCAAAAGAGAATCTGACCAG------------------------CCTGAGAGGATTACTATTTCAATCATGGAGATTACAAACTTANGTATCTTGACTGCGAAAGACGCCAGACTTAATGACACTGCCACCTATCTCTGTGC-------------CAATGGCATTCGGAATGCTGGCACTGAC-------------------------AGACTTATCTTTGGAGGTGGGACCAGACTGACAG…
aV9.1J_V10_090110	GTATTGTTGACTCAACCGGAGGAAGAGACAGGCATTGCC------GGACAGTATCTGAGACTGACATGTAAAACCAGC---GGGTTTGATCTGAATGCATACACTATGTACTGGTACCGACGAAGTCCTGGGAATGGCCTACAATGGCTAGTTCGGTACTATACAGAA---GACAGCAAGTATTTTAATACAGAGTTT---GAAAAGCGAGTTGCTGCTTACAAAGACCTTACAAACAATATGTTCACTTTGGATATCAGACGATTGAGGATTTCAGATCACGCATCATATTATTGTGCAAGA---------CCCCCCCCGGAC--------------------------TACGGAACTGGTAATAAGCTTATCTTTGGAGAGGGGACAAAGTTAACCG…
aV9.1m_T16_072612	GTATTGTTGACTCAACCGGAGGAAGAGACAGGCATTGCC------GGACAGTATCTGAGACTGACATGTAAAACCAGC---GGGTTTGATCTGAATGCATACACTATGTACTGGTACCGACGAAGTCCTGGGAATGGCCTACAATGGCTAGTTCGGTACTATACAGAA---GACAGCAAGTATTTTAATACAGAGTTT---GAAAAGCGAGTTGCTGCTTACAAAGACCTTACAAACAATATGTTCACTTTGGATATCAGACGATTGAGGATTTCAGATCACGCATCATATTATTGTGCAAGA---------TGGGGTCATACT--------------------------------GGAAACACCCCCCTCGTGTTTGGAAATGGGACCCGACTCATAG…
aV9.1J_T19_100410	GTATTGTTGACTCAACCGGAGGAAGAGACAGGCATTGCC------GGACAGTATCTGAGACTGACATGTAAAACCAGC---GGGTTTGATCTGAATGCATACACTATGTACTGGTACCGACGAAGTCCTGGGAATGGCCTACAATGGCTAGTTCGGTACTATACAGAA---GACAGCAAGTATTTTAATACAGAGTTT---GAAAAGCGAGTTGCTGCTTACAAAGACCTTACAAACAATATGTTCACTTTGGATATCAGACGATTGAGGATTTCAGATCACGCATCATATTATTGTGCAAG----------TACT----------------------------------GAGGGGGGTTACACCAATCTTCTGTTTGGAAATGGGACAAGGTTAACTG…
aV9.1J_V20_091410	GAGGATCGGAGGTCACAGGTTGATCACATGGTAACTATTGAA---GGGGAACAGGTGGAACTGCACTGTCAGCTGTCC---TTTGCG------ACTGGCAATACTATAAACTGGTACAAACAAATGCTGTCAGGGTTTCCGATATTTATCGACTCTTTATACAAGGGTATTCAGACT------------------------ACTGGCCGTTACACGCTCTCTTTAGACCGAGTGAAGAAATCTAATATCATGTTCATCGAGGACACCGTCCTTGAGGACGCTGGAATGTATTACTGCGC-------------GAAGAGCTGG----------------------------------GATAACACCAAGCTTATCTTTGGAGAAGGGACCAGACTAACAG…
aV9.1J_V12_110210	GAGGATCGGAGGTCACAGGTTGATCACATGGGAACTATTGAA---GGGGAACAGGTGGAACTGCACTGTCAGTTGTCC---TTTGCG------ACTGGCAATACTATAAACTGGTACAAACAAATGCTGTCAGGGTTTCCGATATTTATCGACTCTTTATACAAGGGATGTCAGACT------------------------ACTGGCCGTTACACGTTCTCTTTAGACCGAGTGAAGAAATCTAATATAATGTTCATCGAGGACACCGTCTTTGAGGACGCTGGAATGTATTACTGCGC-------------GAAG-------------------------------------AATGATGGCATCAGCCTTATCTTTGGAAATGGGACCAGACTGACAG…
aV9.1J_V17_091010	GATGAGGTGAAGCAGTACCCTGGGCTGGCTGTCGTAAGTGAAATGGGAATCGCAACC---ATGAATTGTACCAGC------ACCACT------GCTTTTCCAATTGTGCTCTGGTATAAACAACTCCCGAATCAGCCATCCCAGCATTTGGTAATGGCCAAACGCGGAGCTGATCTA------------------------CACGAAAGGATCACTGCTTCAATTGGTGAAGGAAATAAATTCAGCGCCCTGACTGTGAGACACTCCAGCACCAGCGACAGTGCCATTTATTTCTGCG--------------TCATCATCATG------------------------------AATGATGGCATCAGCCTTATCTTTGGAAATGGGACCAGACTGACAG…
aV9.1J_T06_100710	GATGAGGTGAAGCAGTACCCTGGGCTGGCTGTCGTAAGTGAAATGGGAATCGCAACC---ATGAATTGTACCAGC------ACCACT------GCTTTTCCAATTGTGCACTGGTATAAACAACTCCCGAATCAGCCACCCCAGCATTTGGTAATGGCCAAACGCGGAGCTGATCTA------------------------CACGAAAGGATCACTGCTTCAATTGGTGAAGGAAATAAATTCAGTGCCCTGACTGTGAGACACTCCAGCACCAGCGACAGTGCCATTTATTTT------------------NNGGCGTCCCACGCGCCG-----------------------AATGATGGCATCAGCCTTATCTTTGGAAATGGGACCAGACTGACAG…
aV9.1m_T05_071212	GATGAAGTAATGCAACTTCCCCAGTGGACAATTGTTAGCGAAACAGGAATCGCTTCC---ATGAACTGCTCTACA------ACCACA------AGATTTACCGTGGTGCTTTGGTACCGACAACTCGCGAATCATCCACCCCAGCATCTGGTGACGGCGAAGACAGAAACTGATCAA------------------------GGCGAGAGGATCACCGCTTCAATCAGTGCAGACTACAAACACAGTGCCCTAAGGGTGACAGACGCCAGACTGAACGACACTGCCACCTATCTCTGTGC-------------TGCTGATATAGGAGATAGA----------------------------------AGGTTGATCTTTGGCCGAGGGACCCAGTTAACGG…
aV9.1J_T09_102810	AACGAGGTGTTTCAATCTTCAGAGTCAGTGGTCGTTATCGAG---GGAAAAACTGCCAACTTTTCTTGTTCCACC------ACAGAA------TCAGGGCGGATACTACAGTGGTACAGACAGGACCCGAATGGAGCCATGAAACATCTGGTG------AGCGGTACTGGTGAT---------------------------CGGGGCAGGATCAAGGCTCGGTTCAGTTCGACAGAGAAGACCAGTGCTTTGAATGTTCATGACGCTCGAATGATAGACAGTGCCACCTATTTCTGTGC-------------AGTACCATCGATT-------------------------------GCTAACGCCAAGTTTATCTTTGGAGGTGGAACAAGACTGATCG…
aV10.1J_V13_090110	GACTCGATCTCCCAGGAGCCGTTTTCAGCGATGAAATTTGAGGATGAATTGGTGACCATTAGTTACAATTATTCG------ACCAAA---GCGAGGACATATTCTTTGCAACTATATCGTCAAGATCACGACAAAACCCTAACATTCTTGATC---TACATCCCTAACTATGGCGATCCTATCAGAGCTAAGGGTGTG---GGGCCTCGAGTTTCTGCTAATTTCGACGATGTGAAAAGTGAAGGGAATTTCACCATTCGTGCTCTGCGACTGTCTGACAATGCCGTGTATTACTGCG--------------CACTGCTC------------------------------GAGTATGATGGCTTCAAGCTTATCTTTGGAGGTGGGACCAGACTGACAG…
aV10.1J_V13_091010	GACTCGATCTCCCAGGAGCCGTTTTCAGCGATGAAATTTGAAGATGAATTGGTGACCATTAGTTACAAATATTCG------ACCACT---GCTAGTAGCTTTTCTTTGCAACTATATCGTCAGGATCACGACAAGTCCCTAACCTTCTTGATC---TACATCCCTAACTATGGGAGTGTTATCAGAGCTAAGGGTGTG---GGGCCTCGATTTTCTGCTAATTTCGACGATGTGAAAAGTGAAGGGAATTTCACCATCCGTGATCTGCGACTGTCTGACAATGGCGTGTATTACTGCGGA--------------TTGCTC------------------------------GAGTATGATGGCTTCAAGCTTAGCTTTGGAGGTGGGACCAGACTGACAG…
aV10.1J_V16_110210	GACTCGATCTCCCAGGAGCCGTTTTCAGCGCAGAAATTTGAAGAAGAAACGGTGACCATTAGTTACAATTATTCG------ACCACT---GCTAGGATATATTCTTTGCAACTATATCGTCAAGATCACGACAAACTCATAACATTCTTGATC---TACATCCCTAACTATGGCGATACTATCAGAGCTAAGGGTGTG---GGGCCTCGATTTTCTGCTAATATCGACGATGTGAAAAGTGAAGGGAATTTCACCATCCGTGATCTGCGACTGTCTGACGCCGCCGTGTATTACTGCGGA--------------TTGCTC------------------------------GAGTATGATGGCTTCAAGGTTATCTTTGGATCTGGGACCAGACTTACAG…
aV10.1J_V22_091410	GACTCGATCTCCCAGGAGCCGTTCTCAGCGCAGAAATTTGAAGAAGAAACGGTGACCATTAGTTACAATTATTCG------ACCACT---GCTAGTATATATTCTTTGCAACTATATCGTCAGGATCACGACAAAACCCTAACATTCTTGATC---TACATCCCTAACTATGGCGACGCTATGAGAGCTAAGGGTGTG---GGGCCTCGATTTTCTGCTAATTTCGACGATGTGAAAAGTGAGGGGAATTTCACCATCCGTGATCTGCGACTGTCTGACAATGCCGTGTATTACTGCGG--------------CCTGCTC------------------------------GAGTATGATGGCTTCAAGGTTATCTTTGGAGGTGGGACCAGACTGACAG…
aV10.1J_V03_090110	GACTCGATCTCCCAGGAGCCGTTTTCAGCGATGAAATTTGAAGATGAATTGGTGACCATTAGTTACAATTATTCG------ACCACT---GCAAGTACATATTCTTTGCAACTATATCGTCAGGATCACGACAAAACCCTAACATTCTTGATC---TACATCCCTAACTATGGCGATGCTATCAGAGCTAAGGGTGTG---GGGCCTCGATTTTCTGCTAATTTCGACGATGTGAAAAGTGAAGGGAATTTCACCATCCGTGATCTGCGACTGTCTGACAATGCCGTGTATTACTGCGGAGT----------TCAAT-------------------------------CTGGAGCAGCTGGTTTTAAGCTGATGTTTGGAGAGGGTACAAAGTTAACTG…
aV10.1J_V12_090110	GACTCGATCTCCCAGGAGCCGTTTTCAGCGATGAAATTTGAAGATGAATTGGTGACCATTAGTTACAATTATTCG------ACCACT---GCAAGTACATATTCTTTGCAACTATATCGTCAGGATCACGACAAAACCCTAACATTCTTGATC---TACATCCCTAACTATGGCGATGCTATCAGAGCTAAGGGTGTG---GGGCCTCGATTTTCTGCTAATTTCGACGATGTGAAAAGTGAAGGGAATTTCACCATCCGTGATCTGCGACTGTCTGACAATGCCGTGTATTACTGCGGAGT----------TCAAT-------------------------------CTGGAGCAGCTGGTTTTAAGCTGATGTTTGGAGAGGGTACAAAGTTAACTG…
aV10.1J_V13A_091410	GACTCGATCTCCCAGGAGCCGTTTTCAGCGATGAAATTTGAAGATGAATTGGTGACCATTAGTTACAATTATTCG------ACCACT---GCAAGTACATATTCTTTGCAACTATATCGTCAGGATCACGACAAAACCCTAACATTCTTGATC---TACATCCCTAACTATGGCGATGCTATCAGAGCTAAGGGTGTG---GGGCCTCGATTTTCTGCTAATTTCGACGATGTGAAAAGTGAAGGGAATTTCACCATCCGTGATCTGCGACTGTCTGACAATGCCGTGTATTACTGCGGAGT----------TCAAT-------------------------------CTGGAGCAGCTGGTTTTAAGCTGATGTTTGGAGAGGGTACAAAGTTAACTG…
aV10.1J_V04_090110	GACTCGATCTCCCAGGAGCCGTTTTCAGCGATGAAATTTGAAGATGAATTGGTGACCATTAGTTACAATTATTCG------ACCACT---GCTAGTACATATTCTTTGCAACTATATCGTCAGGATCACGACAAAACCCTAACATTCTTGATC---TACATCCCTAACTATGGCGATGCTATCAGAGCTAAGGGTGTG---GGGCCTCGATTTTCTGCTAATTTCGACGATGTGAAAAGTGAAGGGAATTTCACCATCCGTGATCTGCGACTGTCTGACAATGCCGTGTATTACTGCGGAGTG----------AAAT-------------------------------CTGGAGCAGCTGGTTTTAAGCTGATGTTTGGAGAGGGTACAAAGTTAACTG…
aV10.1J_V21_102810	GACTCGATCTCCCAGGAGCCGTTTTCAGCGATGAAATTTGAAGATGAATTGGTGACCATTAGTTACAATTATTCG------ACCACT---GCTAGTACATATTCTTTGCAACTATATCGTCAGGATCACGACAAAACCCTAACATTCTTGATC---TACATCCCTAACTATGGCGATGCTATCAGAGCTAAGGGTGTG---GGGCCTCGATTTTCTGCTAATTTCGACGATGTGAAAAGTGAAGGGAATTTCACCATCCGTGATCTGCGACTGTCTGACAATGCCGTGTATTACTGCGGAGTG----------AAAT-------------------------------CTGGAGCAGCTGGTTTTAAGCTGATGTTTGGAGAGGGTACAAAGTTAACTG…
aV10.1J_V08_090110	GACTCGATCTCCCAGGAGCCGTTTTCAGCGATGAAATTTGAAGATGAATTGGTGACCATTAGTTACAATTATTCG------ACCACT---GCTAGTACATATTCTTTGCAACTATATCGTCAGGATCACGACAAAACCCTAACATTCTTGATC---TACATCCCTAACTATGGCGATGCTATCAGAGCTAAGGGTGTG---GGGCCTCGATTTTCTGCTAATTTCGACGATGTGAAAAGTGAAGGGAATTTCACCATCCGTGATCTGCGACTGTCTGACAATGCCGTCTATTACTGCGGAGTG----------AAAT-------------------------------CTGGAGCAGCTGGTTTTAAGCTGATGTTTGGAGAGGGTACAAAGTTAACTG…
aV10.1J_V23_101310	GACTCGATCTCCCAGGAGCCGTTTTCAGCGATGAAATTTGAAGATGAATTGGTGACCATTAGTTACAATTATTCG------ACCACT---GCTAGTACATATTCTTTGCAACTATATCGTCAAGATCACGACAAAACCCTAACATTCTTGATC---TACATCCCTAACTATGGCGATGCTATCAGAGCTAAGGGTGTG---GGGCCTCGATTTTCTGCTAATTTCGACGATGTGAAAAGTGAAGGGAATTTCACCATCCGTGATCTGCGACTGTCTGACAATGCCGTGTATTACTGCGGAGTG----------AAAT-------------------------------CTGGAGCAGCTGGTTTTAAGCTGATGTTTGGAGAGGGTACAAAGTTAACTG…
aV10.1J_V21_091410	GACTCGATCTCCCAGGAGCCGTTTTCAGCGATGAAATTTGAAGATGAATTGGTGACCATTAGTTACAATTATTCG------ACCACT---GCTAGTACATATTCTTTGCAACTATATCGTCGGGATCACGACAAAACCCTAACATTCTTGATC---TACATCCCTAACTATGGCGATGCTATCAGAGCTAAGGGTGTG---GGGCCTCGATTTTCTGCTAATTTCGACGATGTGAAAAGTGAAGGGAATTTCACCATCCGTGATCTGCGACTGTCTGACAATGCCGTGTATTACTGCGGAGTG----------AAAT-------------------------------CTGGAGCAGCTGGTTTTAAGCTGATGTTTGGAGAGGGTACAAAGTTAACTG…
aV10.1J_V23_091410	GACTCGATCTCCCAGGAGCCGTTTTCAGCGATGAAATTTGAAGATGAATTGGTGACCATTAGTTACAATTATTCG------ACCACT---GCTAGTACATATTCTTTGCAACTATATCGTCAGGATCACGACAAAACCCTAACATTCTTGATC---TACATCCCTAACTATGGCGATGCTATCAGAGCTAAGGGTGTG---GGGCCTCGATTTTCTGCTAATTTCGACGATGTGAAAAGTGAAGGGAATTTCACCATCCGTGATCTGCGACTGTCTGACAATGCCGTGTATTACTGCGGAGTG----------AAAT-------------------------------CTGGAGCAGCTGGTTTTAAGCTGATGTTTGGAGAGGGTACAAAGTTAACTG…
aV10.1m_T15_080912	GACTCGATCTCCCAGGAGCCGTTTTCAGCGATGAAATTTGAAGATGAATTGGTGACCATTAGTTACAATTATTCG------ACCACT---GCTAGTACATATTCTTTGCAACTATATCGTCAGGATCACGACAAAACCCTAACATTCTTGATC---TACATCCCTAACTATGGCGATGCTATCAGAGCTAAGGGTGTG---GGGCCTCGATTTTCTGCTAATTTCGACGATGTGAAAAGTGAAGGGAATTTCACCATCCGTGATCTGCGACTGTCTGACAATGCCGTGTATTACTGCGGAGTG---------TTTCATT-----------------------------------CAGGCTATGACAAGCTTATCTTTGGAGGTGGGACCAGACTGACAG…
aV10.1m_T02_080212	GACTCGATCTCCCAGGAGCCGTTTTCAGCGATGAAATTTGAAGATGAATTGGTGACCATTAGTTACAATTATTCG------ACCACT---GCTAGTACATATTCTTTGCAACTATATCGTCAGGATCACGACAAAACCCTAACATTCTTGATC---TACATCCCTAACTATGGCGATGCTATCAGAGCTAAGGGTGTG---GGGCCTCGATTTTCTGCTAATTTCGACGATGTGAAAAGTGAAGGGAATTTCACCATCCGTGATCTGCGACTGTCTGACAATGCCGTGTATTACTGCGGAGTG---------TTTCATT-----------------------------------CAGGCTATGACAAGCTTATCTTTGGAGGTGGGACCAGACTGACAG…
aV10.1m_T06_070612	GACTCGATCTCCCAGGAGCCGTTTTCAGCGATGAAATTTGAAGATGAATTGGTGACCATTAGTTACAATTATTCG------ACCACT---GCTAGTACATATTCTTTGCAACTATATCGTCAGGATCACGACAAAACCCTAACATTCTTGATC---TACATCCCTAACTATGGCGATGCTATCAGAGCTAAGGGTGTG---GGGCCTCGATTTTCTGCTAATTTCGACGATGTGAAAAGTGAAGGGAATTTCACCATCCGTGATCTGCGACTGTCTGACAATGCCGTGTATTACTGCGGAGTG---------TTTCATT-----------------------------------CAGGCTATGACAAGCTTATCTTTGGAGGTGGGACCAGACTGACAG…
aV10.1m_T09_072612	GACTCGATCTCCCAGGAGCCGTTTTCAGCGATGAAATTTGAAGATGAATTGGTGACCATTAGTTACAATTATTCG------ACCACT---GCTAGTACATATTCTTTGCAACTATATCGTCAGGATCACGACAAAACCCTAACATTCTTGATC---TACATCCCTAACTATGGCGATGCTATCAGAGCTAAGGGTGTG---GGGCCTCGATTTTCTGCTAATTTCGACGATGTGAAAAGTGAAGGGAATTTCACCATCCGTGATCTGCGACTGTCTGACAATGCCGTGTATTACTGCGGAGTGAA-------TCAGAATGCTAACGCCAAC----------------------------------AAGCTTATCTTTGGAGCAGGGACCAGACTGATAG…
aV10.1m_T14_072612	GACTCGATCTCCCAGGAGCCGTTTTCAGCGATGAAATTTGAAGATGAATTGGTGACCATTAGTTACAATTATTCG------ACCACT---GCTAGTACATATTCTTTGCAACTATATCGTCAGGATCACGACAAAACCCTAACATTCTTGATC---TACATCCCTAACTATGGCGATGCTATCAGAGCTAAGGGTGTG---GGGCCTCGATTTTCTGCTAATTTCGACGATGTGAAAAGTGAAGGGAATTTCACCATCCGTGATCTGCGACTGTCTGACAATGCCGTGTATTACTGCGGAGTGAA-------TCAGAATGCTAACGCCAAC----------------------------------AAGCTTATCTTTGGAGCAGGGACCAGACTGATAG…
aV10.1m_T15_072612	GACTCGATCTCCCAGGAGCCGTTTTCAGCGATGAAATTTGAAGATGAATTGGTGACCATTAGTTACAATTATTCG------ACCACT---GCTAGTACATATTCTTTGCAACTATATCGTCAGGATCACGACAAAACCCTAACATTCTTGATC---TACATCCCTAACTATGGCGATGCTATCAGAGCTAAGGGTGTG---GGGCCTCGATTTTCTGCTAATTTCGACGATGTGAAAAGTGAAGGGAATTTCACCATCCGTGATCTGCGACTGTCTGACAATGCCGTGTATTACTGCGGAGTGAA-------TCAGAATGCTAACGCCAAC----------------------------------AAGCTTATCTTTGGAGCAGGGACCAGACTGATAG…
aV10.1m_T20_071212	GACTCGATCTCCCAGGAGCCGTTTTCAGCGATGAAATTTGAAGATGAATTGGTGACCATTAGTTACAATTATTCG------ACCACT---GCTAGTACATATTCTTTGCAACTATATCGTCAGGATCACGACAAAACCCTAACATTCTTGATC---TACATCCCTAACTATGGCGATGCTATCAGAGCTAAGGGTGTG---GGGCCTCGATTTTCTGCTAATTTCGACGATGTGAAAAGTGAAGGGAATTTCACCATCCGTGATCTGCGACTGTCTGACAATGCCGTGTATTACTGCGGAGTGAA-------TCAGAATGCTAACGCCAAC----------------------------------AAGCTTATCTTTGGAGCAGGGACCAGACTGATAG…
aV10.1m_T21_071212	GACTCGATCTCCCAGGAGCCGTTTTCAGCGATGAAATTTGAAGATGAATTGGTGACCATTAGTTACAATTATTCG------ACCACT---GCTAGTACATATTCTTTGCAACTATATCGTCAGGATCACGACAAAACCCTAACATTCTTGATC---TACATCCCTAACTATGGCGATGCTATCAGAGCTAAGGGTGTG---GGGCCTCGATTTTCTGCTAATTTCGACGATGTGAAAAGTGAAGGGAATTTCACCATCCGTGATCTGCGACTGTCTGACAATGCCGTGTATTACTGCGGAGTG--------------------------------------------ACCGGGAGTGCATCAACACCACTGAAGTTCGGGAATGGGACCGAACTGATCG…
aV10.1m_T23_080212	GACTCGATCTCCCAGGAGCCGTTTTCAGCGATGAAATTTGAAGATGAATTGGTGACCATTAGTTACAATTATTCG------ACCACT---GCTAGTACATATTCTTTGCAACTATATCGTCAGGATCACGACAAAACCCTAACATTCTTGATC---TACATCCCTAACTATGGCGATGCTATCAGAGCTAAGGGTGTG---GGGCCTCGATTTTCTGCTAATTTCGACGATGTGAAAAGTGAAGGGAATTTCACCATCCGTGATCTGCGACTGTCTGACAATGCCGTGTATTACTGCGGAGTG--------------------------------------------ACCGGGAGTGCATCAACACCACTGAAGTTCGGGAATGGGACCGAACTGATCG…
aV10.1m_T17_070612	GACTCGATCTCCCAGGAGCCGTTTTCAGCGATGAAATTTGAAGATGAATTGGTGACCATTAGTTACAATTATTCG------ACCACT---GCTAGTACATATTCTTTGCAACTATATCGTCAGGATCACGACAAAACCCTAACATTCTTGATC---TACATCCCTAACTATGGCGATGCTATCAGAGCTAAAGGTGTG---GGGCCTCGATTTTCTGCTAATTTCGACGATGTGAAAAGTGAAGGGAATTTCACCATCCGTGATCTGCGACTGTCTGACAATGCCGTGTATTACTGCGGAGTGAAA------CGGCCC--------------------------------------GGTAACAACCCGCTTGTCTTTGGAGGTGGGACCAGACTGATCG…
aV10.1m_T18_072012	GACTCGATCTCCCAGGAGCCGTTTTCAGCGATGAAATTTGAAGATGAATTGGTGACCATTAGTTACAATTATTCG------ACCACT---GCTAGTACATATTCTTTGCAACTATATCGTCAGGATCACGACAAAACCCTAACATTCTTGATC---TACATCCCTAACTATGGCGATGCTATCAGAGCTAAAGGTGTG---GGGCCTCGATTTTCTGCTAATTTCGACGATGTGAAAAGTGAAGGGAATTTCACCATCCGTGATCTGCGACTGTCTGACAATGCCGTGTATTACTGCGGAGTGAAA------CGGCCC--------------------------------------GGTAACAACCCGCTTGTCTTTGGAGGTGGGACCAGACTGATCG…
aV10.1m_T13_071212	GACTCGATCTCCCAGGAGCCGTTTTCAGCGATGAAATTTGAAGATGAATTGGTGACCATTAGTTACAATTATTCG------ACCACT---GCTAGTACATATTCTTTGCAACTATATCGTCAGGATCACGACAAAACCCTAACATTCTTGATC---TACATCCCTAACTATGGCGATGCTATCAGAGCTAAAGGTGTG---GGGCCTCGATTTTCTGCTAATTTCGACGATGTGAAAAGTGAAGGGAATTTCACCATCCGTGATCTGCGACTGTCTGACAATGCCGTGTATTACTGCGGAGTGAA-------CGAGCAG----------------------------------GATGGCACCAACAAGCTTATCTTTGGAGGTGGGACCAGACTGACAG…
aV10.1m_T23_072612	GACTCGATCTCCCAGGAGCCGTTTTCAGCGATGAAATTTGAAGATGAATTGGTGACCATTAGTTACAATTATTCG------ACCACT---GCTAGTACATATTCTTTGCAACTATATCGTCAGGATCACGACAAAACCCTAACATTCTTGATC---TACATCCCTAACTATGGCGATGCTATCAGAGCTAAAGGTGTG---GGGCCTCGATTTTCTGCTAATTTCGACGATGTGAAAAGTGAAGGGAATTTCACCATCCGTGATCTGCGACTGTCTGACAATGCCGTGTATTACTGCGGAGTGAA-------CGAGCAG----------------------------------GATGGCACCAACAAGCTTATCTTTGGAGGTGGGACCAGACTGACAG…
aV10.1m_T01_071212	GACTCGATCTCCCAGGAGCCGTTTTCAGCGATGAAATTTGAAGATGAATTGGTGACCATTAGTTACAATTATTCG------ACCACT---GCTAGTACATATTCTTTGCAACTATATCGTCAGGATCACGACAAAACCCTAACATTCTTGATC---TACATCCCTAACTATGGCGATGCTATCAGAGCTAAAGGTGTG---GGGCCTCGATTTTCTGCTAATTTCGACGATGTGAAAAGTGAAGGGAATTTCACCATCCGTGATCTGCGACTGTCTGACAATGCCGTGTATTACTGCGGAGT----------ATCA-------------------------------------AATGATGGCATCAGCCTTATCTTTGGAAATGGGACCAGACTGACAG…
aV10.1m_T08_071612	GACTCGATCTCCCAGGAGCCGTTTTCAGCGATGAAATTTGAAGATGAATTGGTGACCATTAGTTACAATTATTCG------ACCACT---GCTAGTACATATTCTTTGCAACTATATCGTCAGGATCACGACAAAACCCTAACATTCTTGATC---TACATCCCTAACTATGGCGATGCTATCAGAGCTAAAGGTGTG---GGGCCTCGATTTTCTGCTAATTTCGACGATGTGAAAAGTGAAGGGAATTTCACCATCCGTGATCTGCGACTGTCTGACAATGCCGTGTATTACTGCGGAGT----------ATCA-------------------------------------AATGATGGCATCAGCCTTATCTTTGGAAATGGGACCAGACTGACAG…
aV10.1m_T09_080912	GACTCGATCTCCCAGGAGCCGTTTTCAGCGATGAAATTTGAAGATGAATTGGTGACCATTAGTTACAATTATTCG------ACCACT---GCTAGTACATATTCTTTGCAACTATATCGTCAGGATCACGACAAAACCCTAACATTCTTGATC---TACATCCCTAACTATGGCGATGCTATCAGAGCTAAAGGTGTG---GGGCCTCGATTTTCTGCTAATTTCGACGATGTGAAAAGTGAAGGGAATTTCACCATCCGTGATCTGCGACTGTCTGACAATGCCGTGTATTACTGCGGAGT----------ATCA-------------------------------------AATGATGGCATCAGCCTTATCTTTGGAAATGGGACCAGACTGACAG…
aV10.1m_T18_080212	GACTCGATCTCCCAGGAGCCGTTTTCAGCGATGAAATTTGAAGATGAATTGGTGACCATTAGTTACAATTATTCG------ACCACT---GCTAGTACATATTCTTTGCAACTATATCGTCAGGATCACGACAAAACCCTAACATTCTTGATC---TACATCCCTAACTATGGCGATGCTATCAGAGCTAAAGGTGTG---GGGCCTCGATTTTCTGCTAATTTCGACGATGTGAAAAGTGAAGGGAATTTCACCATCCGTGATCTGCGACTGTCTGACAATGCCGTGTATTACTGCGGAGT----------ATCA-------------------------------------AATGATGGCATCAGCCTTATCTTTGGAAATGGGACCAGACTGACAG…
aV10.1m_T19_080212	GACTCGATCTCCCAGGAGCCGTTTTCAGCGATGAAATTTGAAGATGAATTGGTGACCATTAGTTACAATTATTCG------ACCACT---GCTAGTACATATTCTTTGCAACTATATCGTCAGGATCACGACAAAACCCTAACATTCTTGATC---TACATCCCTAACTATGGCGATGCTATCAGAGCTAAAGGTGTG---GGGCCTCGATTTTCTGCTAATTTCGACGATGTGAAAAGTGAAGGGAATTTCACCATCCGTGATCTGCGACTGTCTGACAATGCCGTGTATTACTGCGGAGT----------ATCA-------------------------------------AATGATGGCATCAGCCTTATCTTTGGAAATGGGACCAGACTGACAG…
aV10.1m_T05_060612	GACTCGATCTCCCAGGAGCCGTTTTCAGCGATGAAATTTGAAGATGAATTGGTGACCATTAGTTACAATTATTCG------ACCACT---GCTAGTACATATTCTTTGCAACTATATCGTCAGGATCACGACAAAACCCTAACATTCTTGATC---TACATCCCTAACTATGGCGATGCTATCAGAGCTAAAGGTGTG---GGGCCTCGATTTTCTGCTAATTTCGACGATGTGAAAAGTGAAGGGAATTTCACCATCCGTGATCTGCGACTGTCTGACAATGCCGTGTATTACTGCGGAGTGAAA------TCGCTN--------------------------------------GGAAACACCCCCCTCGTGTTTGGAAATGGGACCCGACTCATAG…
aV10.1m_T07_060612	GACTCGATCTCCCAGGAGCCGTTTTCAGCGATGAAATTTGAAGATGAATTGGTGACCATTAGTTACAATTATTCG------ACCACT---GCTAGTACATATTCTTTGCAACTATATCGTCAGGATCACGACAAAACCCTAACATTCTTGATC---TACATCCCTAACTATGGCGATGCTATCAGAGCTAAAGGTGTG---GGGCCTCGATTTTCTGCTAATTTCGACGATGTGAAAAGTGAAGGGAATTTCACCATCCGTGATCTGCGACTGTCTGACAATGCCGTGTATTACTGCGGAGTGAAA------TCGCTN--------------------------------------GGAAACACCCCCCTCGTGTTTGGAAATGGGACCCGACTCATAG…
aV10.1J_V18_102810	GACTCGATCTCCCAGGAGCCGTTTTCAGCGATGAAATTTGAAGATGAATTGGTGACCATTAGTTACAATTATTCG------ACCACT---GCTAGTACATATTCTTTGCAACTATATCGTCAGGATCACGACAAAACCCTAACATTCTTGATC---TACATCCCTAACTATGGCGATGCTATCAGAGCTAAGGGTGTG---GGGCCTCGATTTTCTGCTAATTTCGACGATGTGAAAAGTGAAGGGAATTTCACCATCCGTGATCTGCGACTGTCTGACAATGCCGTGTATTACTGCGGAGTGA--------GTCGGACTTACGGAGCTGGTACT------------------------------AAGCTTACCTTTGGAGAGGGGACAAAGTTAGCTG…
aV10.1J_T01_100410	GACTCGATCTCCCAGGAGCCGTTTTCAGCGATGAAATTTGAAGATGAATTGGTGACCATTAGTTACAATTATTCG------ACCACT---GCTAGTACATATTCTTTGCAACTATATCGTCAGGATCACGACAAAACCCTAACATTCTTGATC---TACATCCCTAACTATGGCGATGCTATCAGAGCTAAGGGTGTG---GGGCCTCGATTTTCTGCTAATTTCGACGATGTGAAAAGTGAAGGGAATTTCACCATCCGTGATCTGCGACTGTCTGACAATGCCGTGTATTACTGCGGAGTGAAA------GTGCCGGTG--------------------------------GATGGCACCAACAACCTTATCTTTGGAGGTGGGACCAGACTGATCG…
aV10.1m_T13_062612	GACTCGATCTCCCAGGAGCCGTTTTCAGCGATGAAATTTGAAGATGAATTGGTGACCATTAGTTACAATTATTCG------ACCACT---GCTAGTACATATTCTTTGCAACTATATCGTCAGGATCACGACAAAACCCTAACATTCTTGATC---TACATCCCTAACTATGGCGATGCTATCAGAGCTAAGGGTGTG---GGGCCTCGATTTTCTGCTAATTTCGACGATGTGAAAAGTGAAGGGAATTTCACCATCCGTGATCTGCGACTGTCTGACAATGCCGTGTATTACTGCGGAGT----------TCACAC-------------------------------------------CTACAAGTTTATCTTTGGAGCGGGGACCAGACTGACAG…
aV10.1m_T12_070912	GACTCGATCTCCCAGGAGCCGTTTTCAGCGATGAAATTTGAAGATGAATTGGTGACCATTAGTTACAATTATTCG------ACCACT---GCTAGTACATATTCTTTGCAACTATATCGTCAGGATCACGACAAAACCCTAACATTCTTGATC---TACATCCCTAACTATGGCGATGCTATCAGAGCTAAGGGTGTG---GGGCCTCGATTTTCTGCTAATTTCGACGATGTGAAAAGTGAAGGGAATTTCACCATCCGTGATCTGCGACTGTCTGACAATGCCGTGTATTACTGCGGAGTGAA-------CCAGGATATC-------------------------------------GGCTACAAGCTTATCTTTGGAGGTGGGACCAGACTGACAG…
aV10.1J_T46_100410	GACTCGATCTCCCAGGAGCCGTTTTCAGCGATGAAATTTGAAGATGAATTGGTGACCATTAGTTACAATTATTCG------ACCACT---GCTAGTACATATTCTTTGCAACTATATCGTCAGGATCACGACAAAACCCTAACATTCTTGATC---TACATCCCTAACTATGGCGATGCTATCAGAGCTAAGGGTGTG---GGGCCTCGATTTTCTGCTAATTTCGACGATGTGAAAAGTGAAGGGAATTTCACCATCCGTGATCTGCGACTGTCTGACAATGCCGTGTATTACTGCGGAGTGAAA------CGGGATGATT--------------------------------------ACAACAAGCTAATGTTCGGATCTGGAACTAGGCTAACTG…
aV10.1m_T14_062012	GACTCGATCTCCCAGGAGCCGTTTTCAGCGATGAAATTTGAAGATGAATTGGTGACCATTAGTTACAATTATTCG------ACCACT---GCTAGTACATATTCTTTGCAACTATATCGTCAGGATCACGACAAAACCCTAACATTCTTGATC---TACATCCCTAACTATGGCGATGCTATCAGAGCTAAGGGTGTG---GGGCCTCGATTTTCTGCTAATTTCGACGATGTGAAAAGTGAAGGGAATTTCACCATCCGTGATCTGCGACTGTCTGACAATGCCGTGTATTACTGCGGAG-----------CGAACGAGAACTATGCAAACAG------------------------------CCCACTTGTCTTTGGAAATGGAACCAGACTAATAG…
aV10.1m_T03_062012	GACTCGATCTCCCAGGAGCCGTTTTCAGCGATGAAATTTGAAGATGAATTGGTGACCATTAGTTACAATTATTCG------ACCACT---GCTAGTACATATTCTTTGCAACTATATCGTCAGGATCACGACAAAACCCTAACATTCTTGATC---TACATCCCTAACTATGGCGATGCTATCAGAGCTAAAGGTGTG---GGGCCTCGATTTTCTGCTAATTTCGACGATGTGAAAAGTGAAGGGAATTTCACCATCCGTGATCTGCGACTGTCTGACAATGCCGTGTATTACTGCGGAGT----------CGTCTGT----------------------------------------AACAACCCGCTTGTCTTTGGAGGTGGGACCAGACTGATCG…
aV10.1m_T20_062512	GACTCGATCTCCCAGGAGCCGTTTTCAGCGATGAAATTTGAAGATGAATTGGTGACCATTAGTTACAATTATTCG------ACCACT---GCTAGTACATATTCTTTGCAACTATATCGTCAGGATCACGACAAAACCCTAACATTCTTGATC---TACATCCCTAACTATGGCGATGCTATCAGAGCTAAAGGTGTG---GGGCCTCGATTTTCTGCTAATTTCGACGATGTGAAAAGTGAAGGGAATTTCACCATCCGTGATCTGCGACTGTCTGACAATGCCGTGTATTACTGCGGAGTGA--------GGCTGGA------------------------------------TGGAGGCTACGGGCTTACATTCGGAAATGGGACAAGGCTAACTG…
aV10.1m_T08_060612	GACTCGATCTCCCAGGAGCCGTTTTCAGCGATGAAATTTGAAGATGAATTGGTGACCATTAGTTACAATTATTCG------ACCACT---GCTAGTACATATTCTTTGCAACTATATCGTCAGGATCACGACAAAACCCTAACATTCTTGATC---TACATCCCTAACTATGGCGATGCTATCAGAGCTAAGGGTGTG---GGGCCTCGATTTTCTACTAATTTCGACGATGTGAAAAGTGAAGGGAATTTCACCATCCGTGATCTGCGACTGTCTGACAATGCCGTGTATTACTGCGGAGTGAA-------GAAT----------------------------------ATTGTAGGCACTGAAAGACTCACTTTTGGAACTGGGACTCAATTGATAG…
aV10.1B_6.7aJV	GACTCGATCTCCCAGGAGCCGTTTTCAGCGATGAAATTTGAAGATGAATTGGTGACCATTAGTTACAATTATTCG------ACCACT---GCTAGTACATATTCTTTGCAACTATATCGTCAGGATCACGACAAAACCCTAACATTCTTGATC---TACATCCCTAACTATGGCGATGCTATCAGAGCTAAAGGTGTG---GGGCCTCGATTTTCTGCTAATTTCGACGATGTGAAAAGTGAAGGGAATTTCACCATCCGTGATCTGCGACTGTCTGACAATGCCGTGTATTACTGCGGAGTG---------GCTGCA-----------------------------------------------AAGATGATCTTTGGCAGTGGGACCCAACTCACCG…
aV10.2J_T23_100410	GATTCGATCTCACAGGAGCCAGCTACAGCAAAACAGCTTGAAGGACAGTCGGTGAACATTAACTTTAGCTATTCG------ATCAAAATAGCTACTTCACATTCCTTACAATTCTACCTGCAAGACCTGGGTAAATCACCAACACTGTTGGTA---TGCATCCTTCAATCCGGAAATGTTCTCAGATCTGACGGCGTG---GGAAATCGATTTTGTGCAGCTCTGGGCATTTCGAAACCTGAGGGGAATTTCACCACTGGTGACCTACGACTGTCTGACAGCGCTGAGTATT--------------------CCCCATCGTCA---------------------------------------------CTGAAGTTCGGGAATGGGACCGAACTGATCG…
aV10.2J_V07_101310	GATTCGATCTCACAGGAGCCAGCTACAGCAAAACAGCTTGAAGGACAGTCGGTGAACATTAACTTTAGCTATTCG------ATCAAAATAGCTACTTCACATTCCTTACAATTCTACCTGCAAGACCTGGGTAAATCACCAACACTGTTGGTA---TGCATCCTTCAATCCGGAAATGTTCTCAGATCTGACGGCGTG---GGAAATCGATTTTGTGCAGCTCTGGGCATTTCGAAACCTGAGGGGAATTTCACCACTGGTGACCTACGACTGTCTGACAGCGCTGAGTATT--------------------CCTGTGTGCTGAGACATCGCCCCCCT---------------GGAAACAACTACAGGGTTATATTTGGAAATGGCACCAAGCTGACTG…
