# Supplementary figures and images for: Somatic hypermutation of T cell receptor α chain contributes to selection in nurse shark thymus
Source: eLife journal article supplement (doi:10.7554/elife.28477), 2018-04-17

Figure 9 – figure supplement 2

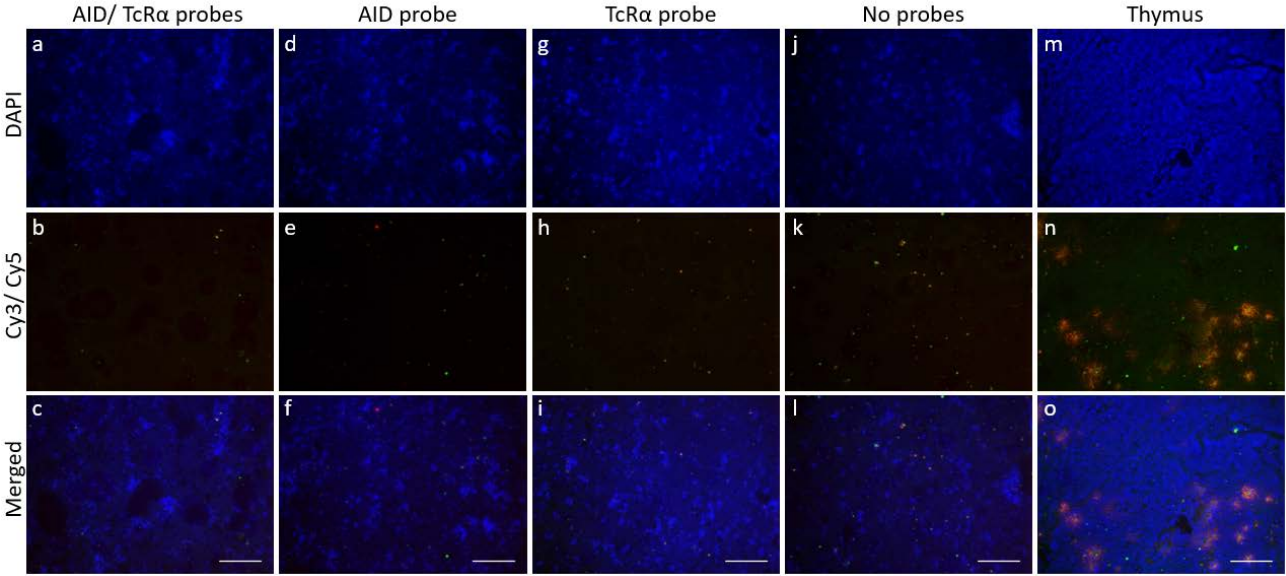

Supplement: supp [file elife-28477-supp-v1.zip › elife_poa_e28477_Figure_9_figure_supplement_2.pdf]

Figure 9 – figure supplement 1

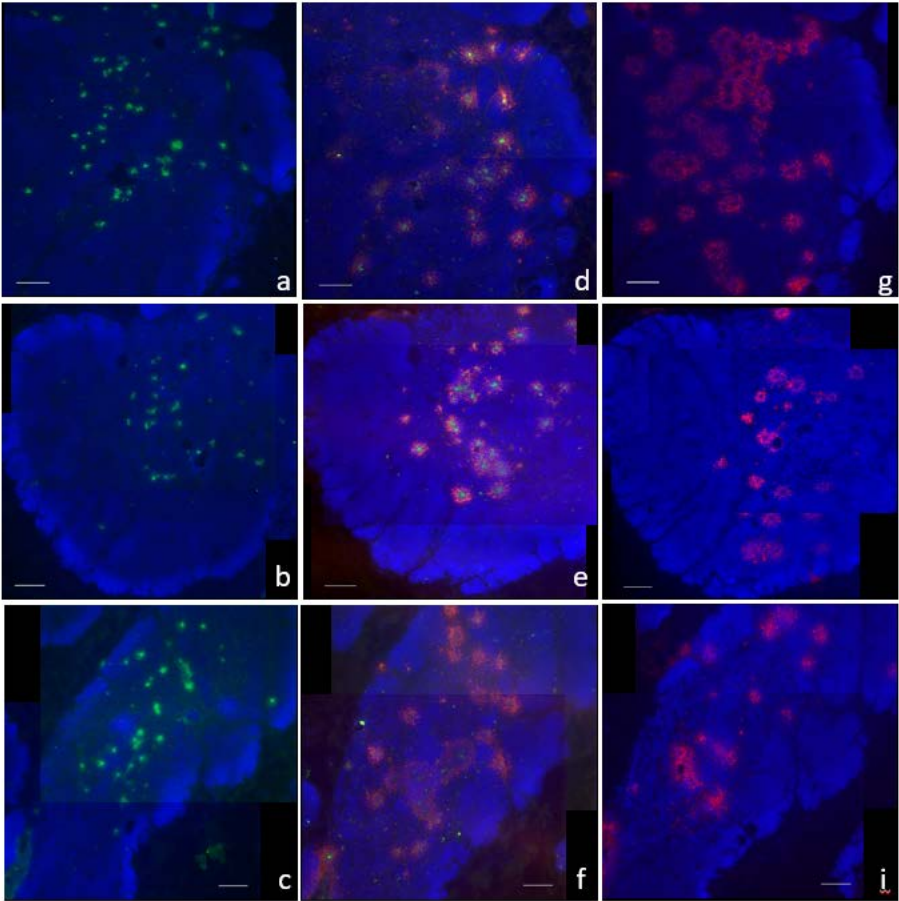

Supplement: supp [file elife-28477-supp-v1.zip › elife_poa_e28477_Figure_9_figure_supplement_1.pdf]
